# Supplementary material
Source: publisher figshare collection journal article supplement (https://gsapubs.figshare.com/articles/dataset/_/12533264)
Supplement: Supplementary file 1 [file 1 › 2016049_Tables.xlsx]

## Sheet: Table S1_XRF data
Table S1: Major (in wt.%) and trace (in ppm) element data for ignimbrites of the Cassia Formation. Major element data is recalculated volatile free.
Member		Shoshone Rhyolite			Kimberly Member			Castleford Crossing Member								Lincoln Reservoir Member												McMullen Creek Member																	Indian Springs Member
Sample		SHO-12.2-001	A2·751.6-754		A2·1419-1424	A2·1945.8-1953.2		AB-14-001	A2·2102-2106	A2·6400-6411	MBH-12.2-013	MBH-11.1-007	CF-14-001	CF-14-002		MCM3-12.1-001	RC-10.1-007	UTC-12.2-001	DG-11.1-002	RC-10.1-008	RC-11.1-003	MCM3-12.1-002	TC-12.1-012	GC-12.2-005	GC-12.2-009	ERC-12.1-004		BCW-12.2-005	HG-11.2-001	RC-10.1-009	IS-11.1-001	DG-11.1-001	CW-11.2-001	HG-11.2-002	RC-10.1-005	TC-12.1-004	TC-12.1-011	GC-12.2-004	GC-12.2-008	BCW-12.2-004	GC-12.2-003	GC-12.2-007	GC-12.2-010		Q2-11.1-001	Q2-11.1-002	DG-11.1-003	RC-10.1-010	RC-10.2-001
Rock Type		lithoidal	basal vitrophyre		upper vitrophyre	basal vitrophyre		upper vitrophyre	upper vitrophyre	lower lithoidal	basal vitrophyre	basal vitrophyre	basal vitrophyre	basal vitrophyre		upper vitrophyre	upper vitrophyre	upper lithoidal	vitrophyre	basal vitrophyre	basal vitrophyre	basal vitrophyre	basal vitrophyre	basal vitrophyre	basal vitrophyre	basal vitrophyre		upper vitrophyre	upper vitrophyre	upper lithoidal	basal vitrophyre	basal vitrophyre	basal vitrophyre	basal vitrophyre	basal vitrophyre	basal vitrophyre	basal vitrophyre	basal vitrophyre	basal vitrophyre	basal vitrophyre	lower grey ash	lower grey ash	lower grey ash		vitrophyre	vitrophyre	vitrophyre	vitrophyre	vitrophyre
Longitude*		N42°36'01.7''	N42°32'55.3"		N42°32'55.3"	N42°32'55.3"		N42°28'11.6"	N42°32'55.3"	N42°32'55.3"	N43°08'34.2''	N43°08'41.6''	N42°32'41.9"	N42°32'41.9"		N42°20'34.3''	N42°20' 36.0''	N42°10'45.8''	N42°24'59.6''	N42°20'31.0"	N42°20'32.0''	N42°20'31.8''	N42°10'44.3''	N42°04'36.7''	N42°01'42.1''	N42°22'29.9''		N42°16'59.0''	N42°19'25.0''	N42°20'27.4"	N42°23'53.6''	N42°24'55.0''	N42°21'08.0''	N42°19'21.4''	N42°20'30.3''	N42°10'00.9''	N42°10'43.0''	N42°04'36.07''	N42°01'42.1''	N42°16'52.9''	N42°04'36.07''	N42°01'42.1''	N41°57'45.8''		N42°23'57.7''	N42°23'54.4''	N42°24'55.1''	N42°20'39.7"	N42°20'39.8''
Latitude*		W114°28'04.9''	W114°22'15.8"		W114°22'15.8"	W114°22'15.8"		W113°28'0.4"	W114°22'15.8"	W114°22'15.8"	W114°39'20.9''	W114°39'33.6''	W114°57'13.7"	W114°57'13.7"		W114°17'00.9''	W114°16' 56.0''	W113°58'35.0''	W114°19'18.0''	W114°16'54.8"	W114°16'59.4''	W114°16'58.6''	W113°57'50.0''	W113°55'37.0''	W113°58'40.9''	W114°10'38.4''		W114°01'22.2''	W114°29'07.9''	W114°16'55.3"	W114°20'35.8''	W114°19'17.0''	W114°25'52.5''	W114°29'06.1''	W114°16'59.3''	W114°00'14.4''	W113°57'48.5''	W113°55'38.7''	W113°58'40.3''	W114°01'28.3''	W113°55'38.7''	W113°58'40.3''	W114°00'44.9''		W114°22'01.0''	W114°22'04.7''	W114°19'35.6''	W114°17'15.8"	W114°17'15.6''
SiO2		68.7569	69.6323		74.148	74.2576		69.8984	68.0388	68.2123	69.7325	70.2721	70.0685	69.8574		72.5012	72.3363	-	72.807	73.297	73.7162	73.434	72.7008	72.1244	-	-		-	74.5871	74.3189	72.7999	73.1127	72.7176	73.9966	71.9908	-	74.653	74.1936	-	-	74.1467	-	-		73.4197	73.7831	73.6933	74.8128	73.1961
TiO2		0.729034	0.699355		0.346375	0.344593		0.713022	0.796736	0.807123	0.767191	0.738997	0.726568	0.754172		0.507015	0.499513	-	0.481049	0.441837	0.451249	0.446574	0.491933	0.392112	-	-		-	0.458713	0.462867	0.481248	0.55238	0.559311	0.503712	0.566076	-	0.414721	0.466724	-	-	0.418646	-	-		0.443857	0.438504	0.421356	0.411838	0.458073
Al2O3		13.4946	13.5245		12.7445	12.5842		13.3367	13.4069	13.4079	13.634	13.5399	13.5429	13.4601		12.689	12.7539	-	12.6484	12.5636	12.3749	12.3423	12.4244	11.8164	-	-		-	12.223	12.357	12.5133	12.5341	12.5859	12.3401	13.1298	-	12.1629	12.1133	-	-	12.0756	-	-		12.3964	12.2756	12.2317	12.2509	12.4148
Fe2O3		4.97343	4.66923		2.99109	2.9711		4.58046	4.8706	4.85355	4.2557	4.22513	4.35396	4.53635		4.14166	4.09928	-	3.93063	3.66523	3.61964	3.67643	3.90996	3.19121	-	-		-	3.21063	3.30653	4.14376	3.79971	3.9447	3.42153	4.08479	-	2.97409	3.01586	-	-	2.74179	-	-		3.80855	3.76507	3.69044	2.90622	3.94036
MnO		0.0728297	0.0810106		0.0799392	0.0727402		0.0885832	0.0953567	0.0789665	0.0657734	0.0657195	0.0724724	0.0724396		0.0735722	0.0750371	-	0.0688071	0.067887	0.0598592	0.151783	0.0671032	0.0587313	-	-		-	0.0541213	0.0465755	0.0696883	0.0625209	0.0668449	0.0432812	0.0697866	-	0.0487896	0.049307	-	-	0.0560188	-	-		0.0608037	0.0626039	0.0638685	0.0435803	0.0593801
MgO		0.781908	0.670021		0.267057	0.185221		0.757327	0.915338	0.869182	0.764584	0.733621	0.794971	0.795697		0.285962	0.238939	-	0.285994	0.201324	0.24366	0.251263	0.313336	0.170903	-	-		-	0.213608	0.170851	0.289555	0.347975	0.369025	0.260545	0.332238	-	0.212943	0.203654	-	-	0.190479	-	-		0.223244	0.221549	0.203278	0.12548	0.221667
CaO		2.13771	2.16723		1.14317	1.08526		2.38891	2.75326	2.46194	2.32766	2.26049	2.29934	2.35603		1.59741	1.82052	-	1.54169	1.30725	1.24784	1.22053	1.56906	1.13395	-	-		-	1.09192	1.11111	1.47657	1.57682	1.67831	1.22282	1.78483	-	1.05851	1.08876	-	-	1.00303	-	-		1.30044	1.29445	1.29897	1.04105	1.26722
Na2O		3.79643	3.64298		3.95675	3.58454		3.37991	4.38867	4.21204	3.00972	3.14031	2.99695	3.21458		2.71782	2.7506	-	3.02511	3.01784	2.98687	3.01008	2.89819	2.50315	-	-		-	2.67716	3.16451	2.91773	2.94991	2.78486	2.5479	2.90644	-	2.45887	2.35094	-	-	2.20651	-	-		3.0076	2.90122	2.94812	2.56244	2.78224
K2O		5.09796	4.81056		4.27251	4.92256		4.67327	4.61774	4.98426	5.27278	4.85597	4.98241	4.76539		5.40194	5.3106	-	5.13072	5.34663	5.22832	5.40316	5.55284	6.1611	-	-		-	5.41731	4.98901	5.21027	4.96631	5.18918	5.58919	5.03137	-	5.9645	6.46043	-	-	7.11054	-	-		5.26684	5.1797	5.36628	5.79406	5.58327
P2O5		0.159142	0.151175		0.0409263	0.0420151		0.174304	0.171821	0.172243	0.17015	0.167712	0.161866	0.187853		0.0844459	0.0833195	-	0.0748723	0.0673975	0.0657959	0.0638791	0.0723526	0.0485327	-	-		-	0.0643711	0.0663586	0.0828288	0.0946495	0.0969522	0.0722673	0.101902	-	0.0516216	0.057386	-	-	0.0506924	-	-		0.0677611	0.0715855	0.076953	0.0495695	0.0630544
LOI		0.404179	1.94516		3.82257	2.57737		1.8	2.64651	0.302448	1.59982	1.66687	2.11392	1.86113		1.88735	2.03076	-	2.33965	2.29242	2.16022	2.24819	2.46251	2.42009	-	-		-	1.92387	1.17596	2.02	2.31855	2.40487	2.87318	2.28475	-	2.58682	2.70263	-	-	2.53	-	-		2.29244	2.62557	2.47151	2.47444	2.71711
ASI Indexa		0.872898	0.904092		0.968179	0.957111		0.903987	0.787806	0.807999	0.928322	0.944788	0.946406	0.927972		0.967046	0.94589	-	0.955065	0.962873	0.969598	0.953591	0.917307	0.923842	-	-		-	1.00384	0.984867	0.960712	0.965498	0.958304	0.996928	0.983473	-	0.983743	0.948483	-	-	0.922541	-	-		0.958587	0.970621	0.946138	0.99435	0.966203
Mg#b		0.260998	0.243774		0.167062	0.122841		0.27083	0.296851	0.286883	0.287544	0.280603	0.290863	0.282657		0.134278	0.11578	-	0.140488	0.109839	0.131357	0.133096	0.15256	0.107387	-	-		-	0.130025	0.104002	0.135677	0.170624	0.173658	0.146075	0.154487	-	0.138557	0.131715	-	-	0.134997	-	-		0.116356	0.116754	0.110113	0.0884168	0.112195
Ba		1165.45	1128.07		1118.91	1113.37		1247.91	968.227	1046.24	1131.46	1051.42	1037.2	1066.39		1156.67	1344.45	1292.97	1145.58	1155.46	1133.55	1210.38	1093.54	1154.09	1185.64	1101.03		1162.22	1188.59	1341.13	1159.49	1137.98	1127.97	1207.73	1155.47	1075.77	1079.89	1101.76	1111.31	1107.29	1158.64	1126.9	1119.16		1127.82	1130.24	1158.94	1162.6	1143.34
Ce		185.087	184.149		170.774	170.468		156.004	137.806	132.976	142.914	139.614	141.623	147.894		165.055	170.495	164.921	165.771	173.423	165.958	165.664	162.119	168.162	162.124	157.88		160.058	170.27	194.342	163.737	162.328	161.893	162.257	168.33	160.507	158.727	161.715	157.919	159.096	166.988	165.322	162.172		168.769	170.996	174.141	170.203	174.244
La		94.7033	90.7298		87.3559	83.6291		84.2517	68.718	68.126	74.2913	70.5299	72.7395	72.8064		85.4068	87.9985	85.42	83.9439	84.4507	86.5171	81.6796	82.4845	83.189	88.6649	78.8049		82.719	81.0677	108.89	84.5542	79.4074	79.1228	78.2889	81.026	81.0907	79.7743	81.519	83.0294	80.069	87.5843	82.7865	81.6153		83.2242	83.5224	85.8757	82.1881	83.9779
Nb		61.8646	61.8919		56.8924	56.9403		45.7459	42.0567	42.8423	42.7953	43.0611	43.1232	42.0733		53.0292	53.3043	54.0373	52.5847	53.8421	55.0125	53.008	52.4525	54.5997	55.1049	51.7076		52.8451	51.9485	53.019	50.9682	50.9879	49.5379	50.8877	50.1434	50.501	51.2451	51.4508	51.3768	51.3405	52.9193	52.0218	51.6658		52.1031	52.0174	52.9798	52.7878	52.1558
Nd		80.1068	78.5216		75.0821	73.5331		70.0397	55.3608	55.9853	58.7729	56.5653	59.0196	60.2962		73.8212	74.0768	69.3425	70.1731	74.3838	74.7528	69.5637	71.3421	72.7243	73.2089	67.4344		67.8462	71.4775	90.9285	70.0552	68.9394	68.8904	66.6398	71.7019	67.4213	68.5045	70.2336	67.4357	67.5824	69.5811	70.1938	68.089		71.0853	72.4	71.4119	69.4382	73.1625
Pb		29.113	27.908		27.4787	27.4265		24.0772	23.0814	22.8813	23.3126	23.4528	23.4848	25.0192		24.5901	24.8921	25.1658	24.9616	25.931	24.6412	25.009	25.0102	26.389	27.1941	24.7512		26.9378	25.2919	24.6858	24.3269	25.4189	24.15	24.5786	25.9071	25.165	25.6815	26.3397	25.6273	26.6503	27.5326	26.0963	26.4771		25.0931	25.9763	25.7717	25.9395	25.2452
Rb		171.713	172.202		173.875	182.779		153.329	156.79	154.412	160.515	161.158	157.427	157.821		159.32	161.647	167.394	161.522	166.424	166.795	162.879	161.915	176.335	170.394	158.477		171.769	173.553	170.902	173.463	166.361	158.157	169.144	162.869	165.666	169.239	176.191	172.465	168.415	185.403	172.626	177.649		178.505	180.031	179.894	177.83	179.112
Sr		108.474	104.116		66.6986	65.4788		130.189	122.666	124.48	128.24	126.41	121.144	125.249		105.828	118.954	96.4799	99.7523	82.7484	83.1378	80.5721	91.2994	68.753	80.783	93.9208		77.1483	74.9778	86.1015	94.1931	96.5267	100.926	84.2826	110.572	74.0254	63.3648	66.0896	72.5491	74.7986	59.9099	74.4774	63.1247		77.8276	75.0241	73.8475	64.4564	79.7141
Th		27.8709	27.876		27.5679	28.1099		25.2669	24.5188	24.7271	25.0474	25.4873	26.0122	25.6184		26.1377	25.8375	27.2381	26.1391	26.8352	27.2019	26.8246	26.2668	27.9974	26.8565	25.5681		27.5727	27.1042	28.2818	27.6742	26.5011	25.4351	26.7648	26.4251	26.7419	27.3252	28.282	27.6784	27.4883	28.1697	27.516	27.1926		28.9158	29.1536	29.5738	28.4196	28.4937
V		23.2447	23.4147		4.14825	3.15623		22.6695	34.6051	34.1469	31.1918	31.6389	25.4205	24.8183		8.09416	9.21061	8.66998	7.69854	5.1095	4.66693	4.02551	2.65795	2.49844	1.98292	4.41919		6.38523	7.95874	10.1101	7.96006	9.58219	11.6107	8.51962	11.6793	6.46094	4.30134	4.83207	7.05632	4.42378	5.12046	8.52332	5.41351		5.99099	5.12284	6.4154	4.53568	8.75033
Y		84.3966	85.4604		79.2709	79.6769		67.0223	56.3429	55.5563	58.0638	57.9996	57.2977	57.9486		77.5981	76.7091	71.8297	74.8847	73.6344	73.8347	72.2866	72.7859	73.5884	73.6112	70.7391		69.2999	65.0372	118.021	72.6258	68.8348	67.6391	64.1973	67.9174	66.4594	68.334	67.4962	67.3302	68.1718	68.3643	67.465	67.4756		73.7509	73.9704	75.3392	67.2129	74.2694
Zn		72.5189	71.644		64.7727	68.1651		55.7134	61.3117	57.0107	53.2594	55.7635	52.7872	49.3819		75.6562	71.7631	67.0609	69.675	65.4217	65.2315	66.4806	68.0446	63.7943	69.5533	67.9671		59.1952	56.376	54.1729	69.1655	58.34	61.6645	57.1663	65.1972	58.952	57.0627	52.7435	58.2443	57.0409	57.1315	59.8459	53.1376		65.6426	66.1513	67.8837	53.773	68.3863
Zr		735.324	733.664		532.286	545.274		590.141	601.284	604.536	560.81	597.826	604.287	583.813		679.418	680.791	652.456	654.954	646.246	645.45	634.93	635.551	612.283	684.039	644.239		638.369	611.874	631.015	622.683	643.4	632.338	607.682	643.533	600.253	586.167	582.128	585.453	608.475	594.638	634.879	569.308		615.037	613.22	635.324	581.375	632.139
Th/Nb		0.450514	0.450398		0.484562	0.493672		0.552331	0.582993	0.577166	0.585285	0.591887	0.603205	0.608899		0.492892	0.484717	0.50406	0.497086	0.498404	0.494467	0.506048	0.500774	0.512775	0.48737	0.494474		0.521765	0.52175	0.533428	0.542969	0.519753	0.513447	0.525959	0.52699	0.529533	0.533226	0.54969	0.538732	0.535411	0.532315	0.528933	0.526317		0.554973	0.560458	0.558208	0.538373	0.546319
Th/Zr		0.0379029	0.0379956		0.0517915	0.0515518		0.042815	0.0407774	0.0409026	0.044663	0.0426333	0.043046	0.0438811		0.0384707	0.0379522	0.041747	0.0399099	0.0415246	0.042144	0.0422481	0.0413292	0.0457262	0.0392616	0.0396873		0.0431924	0.044297	0.0448196	0.0444434	0.0411892	0.0402239	0.0440441	0.0410626	0.0445511	0.0466168	0.0485838	0.0472768	0.0451757	0.0473729	0.0433406	0.0477642		0.0470147	0.0475417	0.0465491	0.0488834	0.0450751
Rb/Sr		1.58299	1.65394		2.60687	2.79142		1.17774	1.27819	1.24046	1.25168	1.27488	1.2995	1.26005		1.50546	1.3589	1.73501	1.61923	2.01121	2.00625	2.02152	1.77345	2.56476	2.10928	1.68734		2.22648	2.31472	1.98489	1.84156	1.72347	1.56706	2.00687	1.47297	2.23797	2.67087	2.66595	2.37722	2.25158	3.0947	2.31783	2.81425		2.29359	2.39964	2.43602	2.75891	2.24693
La/Ba		0.0812589	0.080429		0.0780725	0.0751134		0.0675141	0.070973	0.0651149	0.0656598	0.0670804	0.0701308	0.068274		0.0738386	0.0654531	0.0660648	0.0732763	0.0730883	0.0763242	0.0674827	0.0754292	0.0720819	0.0747821	0.0715738		0.0711733	0.0682051	0.0811928	0.0729234	0.0697795	0.0701462	0.064823	0.070124	0.0753789	0.0738728	0.0739899	0.0747134	0.0723106	0.0755923	0.0734637	0.0729258		0.073792	0.0738982	0.0740985	0.0706936	0.0734495
*co-ordinates in bold indicate type localities; aASI = Alkali Saturation Index; bMg# = [100xMgO/(MgO+FeO)]; LOI = loss on ignition
[truncated: 43 more columns]

## Sheet: Table S2_Cpx data
Table S2: Clinopyroxene composition data (cores and rims) for all Cassia Formation members (values determined by electron microprobe, Open University, Milton Keynes, UK). Note: 'single' denotes a crystal isolated from all others and 'cluster' refers to those that are part of crystal aggregates/clusters.
Shoshone Rhyolite
	A2·751.6-754
	pigeonite	pigeonite	pigeonite	pigeonite	pigeonite	pigeonite	pigeonite	pigeonite	pigeonite	pigeonite	pigeonite	pigeonite	pigeonite	pigeonite	pigeonite	pigeonite	pigeonite	pigeonite	pigeonite	augite	augite	augite	augite	augite	augite	augite	augite	augite	augite	augite	augite	augite	augite	augite	augite	augite	augite
	core	core	core	core	core	core	core	core	core	core	core	core	core	core	core	core	core	core	core	core	core	core	core	core	core	core	core	core	core	core	core	core	core	core	core	core	core
	single	single	single	single	single	single	single	single	single	single	single	single	single	single	single	single	single	single	single	single	single	single	single	single	single	single	single	single	single	single	single	single	single	single	single	single	single
SiO2	48.682	48.748	49.205	49.004	48.793	46.78	48.775	48.266	48.434	48.447	48.414	47.143	48.312	47.55	47.689	47.916	47.819	48.063	48.125	48.526	48.644	48.418	48.759	48.288	48.799	48.598	48.923	48.261	48.441	48.752	49.028	49.011	49.007	48.589	48.617	48.091	48.199
TiO2	0.164	0.233	0.225	0.231	0.226	0.153	0.168	0.195	0.175	0.192	0.233	0.207	0.199	0.195	0.218	0.203	0.135	0.233	0.209	0.352	0.319	0.293	0.335	0.406	0.279	0.315	0.308	0.408	0.295	0.357	0.32	0.403	0.296	0.335	0.344	0.364	0.25
Al2O3	0.279	0.28	0.344	0.291	0.311	0.422	0.324	0.298	0.304	0.289	0.332	0.257	0.274	0.276	0.274	0.303	0.27	0.253	0.292	0.669	0.715	0.799	0.734	0.905	0.732	0.735	0.722	0.782	0.738	0.83	0.71	0.859	0.864	0.761	0.859	0.731	0.675
Cr2O3	0.025	0.003	0.003	0.001	0.007	0	0	0	0	0.003	0	0.002	0	0	0	0.022	0	0	0	0.019	0	0.011	0	0.009	0.013	0.014	0.004	0.003	0.001	0.014	0.003	0	0	0	0	0.011	0
FeO	30.754	30.607	29.632	31.08	31.354	30.181	31.42	30.665	30.451	30.39	30.823	30.301	30.952	30.602	30.8	30.243	30.311	31.08	30.898	19.539	18.979	18.678	17.825	18.585	17.74	18.345	18.344	18.552	18.033	18.422	18.103	18.518	18.139	17.887	17.946	18.191	18.089
MnO	1.075	1.106	1.029	1.119	1.083	1.036	1.105	1.098	1.078	1.066	1.111	1.064	1.081	1.122	1.052	1.093	1.119	1.086	1.139	0.685	0.672	0.635	0.634	0.653	0.602	0.633	0.645	0.656	0.646	0.615	0.638	0.632	0.62	0.659	0.622	0.614	0.647
MgO	13.605	13.396	13.515	13.276	13.567	12.778	13.175	13.659	13.567	13.71	13.471	13.551	13.212	13.497	13.23	13.257	13.166	13.459	13.457	10.728	10.617	10.832	11.359	10.637	11.331	10.671	11.162	10.793	11.058	10.928	11.222	10.746	11.021	10.871	10.905	10.881	11.119
CaO	3.849	3.922	5.122	3.829	3.851	3.675	3.805	3.78	3.733	3.725	3.757	3.66	3.753	3.711	3.848	3.745	3.769	3.744	3.756	16.925	17.682	17.286	18.099	18.008	17.732	18.201	17.651	17.56	17.946	18.035	17.732	17.656	17.652	17.998	17.947	17.996	17.959
Na2O	0.051	0.022	0.115	0.057	0.064	0.096	0.048	0.055	0.025	0.064	0.082	0.056	0.01	0.06	0.048	0.079	0.098	0.06	0.121	0.251	0.25	0.33	0.278	0.271	0.309	0.345	0.277	0.302	0.304	0.233	0.309	0.313	0.273	0.336	0.339	0.294	0.263
K2O	0	0	0	0	0	0.001	0	0	0	0	0	0	0	0	0	0	0	0	0	0	0	0	0	0	0	0	0	0	0	0	0	0	0	0	0	0	0
NiO	0	0	0.002	0.01	0.008	0.007	0.023	0.008	0.02	0.01	0.007	0.005	0	0	0.004	0.013	0	0.006	0	0.008	0	0.002	0	0.007	0.001	0	0.029	0.001	0	0	0.007	0.007	0.018	0.006	0	0	0
BaO	0	0	0	0	0.022	0.109	0.026	0	0.007	0	0	0	0.009	0.052	0	0.014	0.043	0	0	0	0	0.025	0	0.012	0.011	0	0.004	0.024	0	0.008	0.018	0	0	0	0.003	0.032	0
Total	98.484	98.316	99.194	98.899	99.285	95.238	98.87	98.024	97.794	97.895	98.231	96.247	97.801	97.067	97.161	96.89	96.73	97.985	97.996	97.701	97.878	97.309	98.022	97.78	97.549	97.856	98.069	97.344	97.462	98.194	98.091	98.145	97.889	97.442	97.582	97.204	97.2
O	6	6	6	6	6	6	6	6	6	6	6	6	6	6	6	6	6	6	6	6	6	6	6	6	6	6	6	6	6	6	6	6	6	6	6	6	6
Si	1.9575	1.962	1.9575	1.9635	1.9515	1.9515	1.959	1.9515	1.959	1.9575	1.9545	1.944	1.959	1.9455	1.95	1.959	1.9605	1.9485	1.95	1.9395	1.9395	1.938	1.9335	1.9275	1.941	1.9365	1.9395	1.9335	1.9335	1.9335	1.941	1.9425	1.944	1.9395	1.9365	1.929	1.932
Ti	0.0045	0.0075	0.006	0.0075	0.0075	0.0045	0.0045	0.006	0.006	0.006	0.0075	0.006	0.006	0.006	0.006	0.006	0.0045	0.0075	0.006	0.0105	0.009	0.009	0.0105	0.012	0.009	0.009	0.009	0.012	0.009	0.0105	0.009	0.012	0.009	0.0105	0.0105	0.0105	0.0075
Al	0.0135	0.0135	0.0165	0.0135	0.015	0.021	0.015	0.0135	0.015	0.0135	0.0165	0.012	0.0135	0.0135	0.0135	0.015	0.0135	0.012	0.0135	0.0315	0.033	0.0375	0.0345	0.042	0.0345	0.0345	0.033	0.0375	0.0345	0.039	0.033	0.0405	0.0405	0.036	0.0405	0.0345	0.0315
Cr	0.0015	0	0	0	0	0	0	0	0	0	0	0	0	0	0	0	0	0	0	0	0	0	0	0	0	0	0	0	0	0	0	0	0	0	0	0	0
Fe2	1.0335	1.0305	0.9855	1.041	1.0485	1.053	1.056	1.0365	1.0305	1.0275	1.041	1.0455	1.05	1.047	1.053	1.0335	1.0395	1.0545	1.047	0.654	0.633	0.6255	0.591	0.621	0.5895	0.6105	0.609	0.621	0.6015	0.6105	0.6	0.6135	0.6015	0.597	0.5985	0.6105	0.606
Mn	0.036	0.0375	0.0345	0.0375	0.036	0.036	0.0375	0.0375	0.0375	0.036	0.0375	0.0375	0.0375	0.039	0.036	0.0375	0.039	0.0375	0.039	0.0225	0.0225	0.021	0.021	0.0225	0.021	0.021	0.021	0.0225	0.0225	0.021	0.021	0.021	0.021	0.0225	0.021	0.021	0.0225
Mg	0.816	0.804	0.8025	0.7935	0.8085	0.795	0.789	0.8235	0.8175	0.825	0.81	0.8325	0.7995	0.8235	0.807	0.8085	0.804	0.813	0.813	0.639	0.6315	0.6465	0.672	0.633	0.672	0.6345	0.66	0.645	0.6585	0.6465	0.663	0.6345	0.651	0.6465	0.648	0.651	0.6645
Ca	0.1665	0.1695	0.219	0.165	0.165	0.165	0.1635	0.1635	0.162	0.1605	0.162	0.162	0.1635	0.162	0.168	0.1635	0.165	0.162	0.1635	0.7245	0.756	0.741	0.768	0.7695	0.756	0.777	0.75	0.753	0.768	0.7665	0.753	0.75	0.75	0.7695	0.7665	0.774	0.771
Na	0.0045	0.0015	0.009	0.0045	0.0045	0.0075	0.003	0.0045	0.0015	0.0045	0.006	0.0045	0.0015	0.0045	0.0045	0.006	0.0075	0.0045	0.009	0.0195	0.0195	0.0255	0.021	0.021	0.024	0.027	0.021	0.024	0.024	0.018	0.024	0.024	0.021	0.0255	0.0255	0.0225	0.021
K	0	0	0	0	0	0	0	0	0	0	0	0	0	0	0	0	0	0	0	0	0	0	0	0	0	0	0	0	0	0	0	0	0	0	0	0	0
Ni	0	0	0	0	0	0	0	0	0	0	0	0	0	0	0	0	0	0	0	0	0	0	0	0	0	0	0.0015	0	0	0	0	0	0	0	0	0	0
Ba	0	0	0	0	0	0.0015	0	0	0	0	0	0	0	0.0015	0	0	0	0	0	0	0	0	0	0	0	0	0	0	0	0	0	0	0	0	0	0	0
Total	4.032	4.0245	4.032	4.0245	4.0365	4.0365	4.0305	4.038	4.029	4.032	4.035	4.0455	4.029	4.044	4.038	4.0305	4.0335	4.041	4.041	4.0425	4.044	4.047	4.05	4.05	4.0455	4.05	4.044	4.0485	4.0515	4.0455	4.044	4.038	4.038	4.0455	4.0455	4.0545	4.0545
Enstatite	40.4762	40.1198	39.9851	39.6849	39.9852	39.4933	39.283	40.6968	40.6716	40.9836	40.2385	40.8088	39.7168	40.5166	39.7929	40.3141	40.0299	40.0591	40.1779	31.6729	31.2546	32.1162	33.0871	31.2824	33.3086	31.3798	32.6895	31.9465	32.4704	31.9496	32.8869	31.7568	32.5094	32.1162	32.1908	31.9823	32.5496
Ferrosilite	51.2649	51.4222	49.1031	52.063	51.8546	52.31	52.5765	51.2231	51.2687	51.0432	51.7139	51.25	52.161	51.5129	51.9231	51.5333	51.755	51.9586	51.742	32.4164	31.3289	31.073	29.099	30.6894	29.2193	30.1929	30.1634	30.7578	29.6598	30.1705	29.7619	30.7057	30.0375	29.6572	29.7317	29.9926	29.6841
Wollastonite	8.25893	8.45808	10.9118	8.25206	8.16024	8.19672	8.1404	8.08006	8.0597	7.97317	8.04769	7.94118	8.12221	7.97048	8.28402	8.15258	8.21509	7.98226	8.08006	35.9108	37.4165	36.8107	37.8139	38.0282	37.4721	38.4273	37.1471	37.2957	37.8698	37.8799	37.3512	37.5375	37.4532	38.2265	38.0775	38.0251	37.7663
total	100	100	100	100	100	100	100	100	100	100	100	100	100	100	100	100	100	100	100	100	100	100	100	100	100	100	100	100	100	100	100	100	100	100	100	100	100
Mg#	44.12	43.8267	44.8826	43.2543	43.538	43.0195	42.7642	44.2742	44.237	44.5344	43.7601	44.3291	43.2279	44.0257	43.3871	43.8925	43.6127	43.5341	43.7097	49.42	49.9407	50.8255	53.2067	50.4785	53.2699	50.9639	52.0095	50.9479	52.2619	51.432	52.4941	50.8413	51.976	51.9903	51.9856	51.6052	52.3022
Kimberly Member
	A2·1945.8-1953.2
	pigeonite	pigeonite	pigeonite	pigeonite	augite	augite	augite	augite	augite	augite	augite	augite	augite	augite	augite	augite	augite	augite	augite	augite	augite	augite	augite	augite	augite	augite	augite	augite	augite	augite	augite	augite	augite	augite	augite	augite
	core	rim	core	core	rim	core	rim	core	rim	core	rim	core	rim	core	rim	rim	rim	core	rim	core	rim	core	rim	core	rim	core	rim	core	rim	core	rim	core	rim	core	rim	core
	single	single	single	single	single	single	single	single	single	single	single	single	single	single	single	single	single	single	single	single	single	single	single	single	single	single	single	single	single	single	single	single	single	single	single	single
SiO2	46.619	46.122	46.888	46.45	46.728	47.15	47.326	47.249	46.578	46.467	47.341	46.827	46.851	47.346	47.834	47.215	47.617	47.638	47.678	47.619	47.28	47.258	47.196	47.116	47.414	47.357	47.468	47.331	47.665	47.292	47.267	47.713	46.825	47.046	47.28	47.069
TiO2	0.235	0.183	0.161	0.169	0.295	0.312	0.285	0.325	0.329	0.25	0.302	0.288	0.242	0.291	0.258	0.341	0.233	0.272	0.239	0.256	0.274	0.34	0.285	0.354	0.317	0.341	0.29	0.311	0.263	0.319	0.265	0.239	0.214	0.266	0.322	0.284
Al2O3	0.374	0.223	0.244	0.204	0.616	0.601	0.53	0.711	0.574	0.521	0.728	0.591	0.694	0.557	0.676	1.243	0.707	0.598	0.592	0.586	0.577	0.601	0.576	0.56	0.546	0.563	0.578	0.592	0.547	0.568	0.546	0.58	0.536	0.51	0.571	0.558
Cr2O3	0.002	0	0	0	0	0.019	0.005	0.032	0.02	0	0	0	0	0.029	0.024	0	0	0	0	0	0	0.018	0	0.013	0	0	0	0.03	0.017	0	0	0	0	0	0.011	0.01
FeO	36.727	38.13	38.513	38.12	25.234	25.385	25.261	25.142	25.366	25.837	23.995	25.529	25.471	25.68	25.429	24.924	25.168	25.515	25.522	25.639	24.761	24.896	25.708	25.577	25.301	25.611	25.461	26.137	25.343	25.668	25.569	25.523	27.584	27.272	25.595	26.167
MnO	1.466	1.579	1.601	1.53	0.97	0.955	1.008	0.97	0.956	0.972	0.93	0.965	0.94	0.984	0.982	0.879	0.92	0.957	0.965	0.977	0.904	0.965	0.979	0.986	0.975	0.938	0.963	1.028	0.972	0.952	0.977	1.001	1.052	1.074	0.972	0.987
MgO	9.079	7.109	7.109	7.064	5.996	6.22	6.364	6.415	6.131	6.206	7.308	6.182	6.334	6.183	6.431	5.913	6.363	6.327	6.351	6.161	6.614	6.695	6.22	6.214	6.303	5.938	6.185	6.071	6.443	5.669	6.46	6.399	6.1	6.153	6.299	6.146
CaO	3.483	4.268	4.268	4.374	16.751	16.841	16.904	16.723	17.009	16.752	17.229	16.727	16.123	16.888	16.615	15.936	16.686	16.867	17.01	16.926	17.145	16.868	16.831	16.661	16.939	17.284	17.139	16.621	17.028	17.153	16.846	16.845	15.077	15.605	16.775	16.818
Na2O	0.096	0.034	0.075	0.087	0.278	0.285	0.211	0.25	0.222	0.166	0.23	0.229	0.252	0.235	0.282	0.218	0.231	0.213	0.229	0.245	0.191	0.24	0.162	0.22	0.301	0.248	0.263	0.208	0.21	0.246	0.235	0.233	0.176	0.24	0.204	0.299
K2O	0	0	0	0	0	0	0	0	0.002	0	0	0	0.031	0	0.035	0.364	0.048	0	0	0	0	0	0	0	0	0	0	0	0	0	0	0	0	0	0	0
NiO	0	0	0	0	0	0	0.006	0	0.003	0.006	0.006	0	0	0	0	0	0	0.003	0.009	0	0.018	0	0	0.012	0.015	0.005	0.025	0	0	0.023	0.001	0	0	0.001	0	0.025
BaO	0.017	0	0.006	0	0.008	0.031	0.008	0.049	0.028	0.053	0	0	0	0.047	0.048	0.017	0	0.011	0.029	0.01	0	0.018	0.009	0.004	0.022	0	0.002	0.008	0	0.036	0	0.013	0	0	0	0
Total	98.097	97.648	98.864	97.998	96.876	97.799	97.909	97.867	97.218	97.23	98.068	97.337	96.939	98.239	98.615	97.051	97.972	98.401	98.624	98.419	97.765	97.9	97.966	97.718	98.134	98.283	98.374	98.337	98.488	97.925	98.166	98.546	97.565	98.168	98.028	98.362
O	6	6	6	6	6	6	6	6	6	6	6	6	6	6	6	6	6	6	6	6	6	6	6	6	6	6	6	6	6	6	6	6	6	6	6	6
Si	1.9485	1.9575	1.9635	1.9635	1.9455	1.944	1.947	1.944	1.9365	1.935	1.9335	1.9425	1.947	1.9455	1.9515	1.953	1.953	1.95	1.9485	1.95	1.944	1.941	1.944	1.9455	1.947	1.9455	1.9455	1.9455	1.9485	1.9515	1.9425	1.95	1.947	1.944	1.9455	1.938
Ti	0.0075	0.006	0.0045	0.006	0.009	0.009	0.009	0.0105	0.0105	0.0075	0.009	0.009	0.0075	0.009	0.0075	0.0105	0.0075	0.009	0.0075	0.0075	0.009	0.0105	0.009	0.0105	0.0105	0.0105	0.009	0.009	0.0075	0.0105	0.0075	0.0075	0.006	0.009	0.0105	0.009
Al	0.018	0.0105	0.012	0.0105	0.03	0.0285	0.0255	0.0345	0.0285	0.0255	0.0345	0.0285	0.0345	0.027	0.033	0.06	0.0345	0.0285	0.0285	0.0285	0.0285	0.0285	0.0285	0.027	0.027	0.027	0.0285	0.0285	0.027	0.027	0.027	0.0285	0.027	0.0255	0.027	0.027
Cr	0	0	0	0	0	0	0	0.0015	0	0	0	0	0	0.0015	0.0015	0	0	0	0	0	0	0	0	0	0	0	0	0.0015	0	0	0	0	0	0	0	0
Fe2	1.284	1.353	1.3485	1.347	0.879	0.876	0.87	0.8655	0.882	0.9	0.8205	0.885	0.885	0.882	0.867	0.8625	0.864	0.873	0.8715	0.8775	0.852	0.855	0.8865	0.8835	0.8685	0.8805	0.873	0.8985	0.867	0.885	0.879	0.873	0.9585	0.942	0.8805	0.9
Mn	0.0525	0.057	0.057	0.0555	0.0345	0.033	0.0345	0.0345	0.033	0.0345	0.0315	0.0345	0.033	0.0345	0.0345	0.0315	0.0315	0.033	0.033	0.0345	0.0315	0.033	0.0345	0.0345	0.0345	0.033	0.033	0.036	0.033	0.033	0.0345	0.0345	0.0375	0.0375	0.0345	0.0345
Mg	0.5655	0.45	0.444	0.4455	0.372	0.3825	0.39	0.393	0.3795	0.3855	0.4455	0.3825	0.393	0.3795	0.3915	0.3645	0.3885	0.3855	0.387	0.3765	0.405	0.4095	0.3825	0.3825	0.3855	0.363	0.378	0.372	0.393	0.348	0.396	0.39	0.378	0.3795	0.387	0.3765
Ca	0.156	0.1935	0.192	0.198	0.747	0.744	0.7455	0.7365	0.7575	0.747	0.7545	0.744	0.7185	0.744	0.726	0.7065	0.7335	0.7395	0.744	0.7425	0.756	0.7425	0.7425	0.7365	0.7455	0.7605	0.753	0.732	0.7455	0.7575	0.741	0.738	0.672	0.69	0.7395	0.741
Na	0.0075	0.003	0.006	0.0075	0.0225	0.0225	0.0165	0.0195	0.018	0.0135	0.018	0.018	0.021	0.018	0.0225	0.018	0.018	0.0165	0.018	0.0195	0.015	0.0195	0.0135	0.018	0.024	0.0195	0.021	0.0165	0.0165	0.0195	0.018	0.018	0.0135	0.0195	0.0165	0.024
K	0	0	0	0	0	0	0	0	0	0	0	0	0.0015	0	0.0015	0.0195	0.003	0	0	0	0	0	0	0	0	0	0	0	0	0	0	0	0	0	0	0
Ni	0	0	0	0	0	0	0	0	0	0	0	0	0	0	0	0	0	0	0	0	0	0	0	0	0	0	0.0015	0	0	0.0015	0	0	0	0	0	0.0015
Ba	0	0	0	0	0	0	0	0.0015	0	0.0015	0	0	0	0.0015	0.0015	0	0	0	0	0	0	0	0	0	0	0	0	0	0	0	0	0	0	0	0	0
Total	4.0395	4.032	4.0275	4.0305	4.041	4.0425	4.0395	4.038	4.047	4.05	4.0485	4.044	4.0395	4.041	4.0365	4.0245	4.0335	4.0365	4.0395	4.038	4.041	4.0425	4.0395	4.0395	4.0425	4.0395	4.041	4.0395	4.038	4.035	4.0455	4.038	4.041	4.0455	4.0395	4.0515
Enstatite	28.1975	22.5394	22.3734	22.3813	18.6186	19.1011	19.4465	19.6992	18.7964	18.9668	22.049	19.0157	19.6844	18.923	19.7279	18.8518	19.5619	19.2943	19.3258	18.858	20.1192	20.4036	19.0157	19.1011	19.2798	18.1138	18.8623	18.5768	19.5961	17.483	19.6429	19.4903	18.82	18.8665	19.2825	18.6617
Ferrosilite	64.0239	67.7686	67.9516	67.6714	43.994	43.7453	43.3807	43.3835	43.685	44.2804	40.6088	43.997	44.3276	43.9791	43.6886	44.6082	43.5045	43.6937	43.5206	43.9519	42.3249	42.6009	44.0716	44.1199	43.4359	43.9371	43.5629	44.8689	43.2311	44.4612	43.6012	43.6282	47.7222	46.8307	43.8714	44.6097
Wollastonite	7.77861	9.69196	9.67498	9.94725	37.3874	37.1536	37.1728	36.9173	37.5186	36.7528	37.3422	36.9873	35.988	37.098	36.5835	36.54	36.9335	37.012	37.1536	37.1901	37.5559	36.9955	36.9128	36.779	37.2843	37.9491	37.5749	36.5543	37.1728	38.0558	36.756	36.8816	33.4578	34.3028	36.846	36.7286
total	100	100	100	100	100	100	100	100	100	100	100	100	100	100	100	100	100	100	100	100	100	100	100	100	100	100	100	100	100	100	100	100	100	100	100	100
Mg#	30.5758	24.9584	24.7699	24.8536	29.7362	30.3933	30.9524	31.2277	30.0832	29.9883	35.1896	30.1775	30.7512	30.0832	31.1085	29.7066	31.018	30.6317	30.7509	30.0239	32.2196	32.3843	30.1418	30.2133	30.7416	29.1918	30.2158	29.2798	31.1905	28.2238	31.0588	30.8789	28.2828	28.7174	30.5325	29.4947
Castleford Crossing Member
	CF-14-001																																							A2·2102-2106
	augite	augite	pigeonite	augite	augite	pigeonite	pigeonite	pigeonite	augite	pigeonite	pigeonite	augite	augite	pigeonite	augite	pigeonite	pigeonite	pigeonite	pigeonite	pigeonite	pigeonite	pigeonite	pigeonite	augite	pigeonite	pigeonite	pigeonite	augite	augite	pigeonite	pigeonite	augite	augite	pigeonite	pigeonite	augite	augite	augite	pigeonite	pigeonite	pigeonite	pigeonite	pigeonite	pigeonite	pigeonite	augite	augite	pigeonite	pigeonite
	core	core	core	core	rim	core	rim	core	core	core	rim	core	rim	core	core	core	rim	core	rim	core	rim	core	core	core	core	core	rim	core	core	core	core	core	rim	rim	core	core	rim	core	core	core	core	core	core	rim	core	rim	core	core	rim
	cluster	cluster	cluster	cluster	cluster	single	single	cluster	cluster	single	single	single	single	cluster	cluster	single	single	single	single	single	single	single	single	cluster	cluster	cluster	cluster	cluster	cluster	cluster	single	single	single	single	single	single	single	single	single	cluster	cluster	cluster	single	single	single	cluster	cluster	cluster	cluster
SiO2	51.1185	50.8688	50.9679	51.2521	51.1675	51.0215	50.8424	50.9884	51.1563	50.6092	50.6493	51.0965	51.2707	50.9221	51.2733	51.0872	51.0606	51.2139	51.2392	51.1587	50.7827	51.2448	51.0281	51.349	51.1473	50.7734	51.1851	51.0703	51.2154	51.138	50.8904	51.2438	51.5379	51.2733	51.12	51.3444	51.3663	50.9742	50.9839	51.3246	50.9528	50.8402	50.7384	51.0579	51.1105	51.3332	51.1141	50.3548	51.1494
TiO2	0.351466	0.435622	0.265117	0.344502	0.357297	0.24839	0.237724	0.217393	0.343668	0.245749	0.218816	0.335332	0.379733	0.252067	0.306869	0.227382	0.271727	0.271065	0.29125	0.248714	0.247339	0.253869	0.237645	0.358887	0.268206	0.215166	0.238217	0.362129	0.32815	0.237219	0.243499	0.329324	0.394988	0.228595	0.223313	0.382109	0.370364	0.395591	0.231116	0.221878	0.219	0.230935	0.22164	0.247396	0.223727	0.337629	0.353843	0.22301	0.261805
Al2O3	0.905845	0.949658	0.443846	0.91724	0.936766	0.44973	0.450704	0.458863	0.915759	0.430945	0.432702	0.880826	0.954468	0.526807	0.872003	0.42387	0.485877	0.423626	0.467556	0.418788	0.419708	0.520056	0.435082	0.916571	0.438406	0.435179	0.428599	0.930333	0.866568	0.41964	0.431677	1.00065	0.997623	0.461988	0.440378	0.945701	0.96857	0.958534	0.425654	0.346144	0.41011	0.42026	0.457796	0.435082	0.416335	0.893218	0.907513	0.441833	0.449665
Cr2O3	0	0.028656	0	0	0.035829	0	0.024606	0	0.03351	0.024539	0	0.016763	0	0	0	0.017912	0	0.026902	0.02013	0.071548	0	0	0.006708	0.007172	0	0.033476	0.029048	0.016739	0	0.102831	0.022328	0.043112	0.040619	0	0	0	0	0.031086	0	0	0.051375	0	0.093818	0	0.049148	0.021539	0	0.053613	0.006704
FeO	16.0698	16.1661	28.8681	15.5564	16.2885	28.5393	28.3912	28.7004	15.6187	29.1429	28.1703	15.4897	15.8794	28.6094	15.736	28.1674	28.5457	27.8262	28.6282	28.586	28.6894	26.4012	28.5744	15.9753	28.9705	28.7609	28.9401	15.8782	16.0778	28.7138	29.0169	15.3474	16.1721	28.6147	29.1437	15.8572	16.0934	15.865	28.8627	28.7177	28.902	28.5969	28.921	28.793	29.0478	15.6667	16.0808	28.4189	28.8714
MnO	0.583008	0.605307	0.990863	0.540848	0.546259	0.918975	0.872683	0.982977	0.552585	0.936981	0.968313	0.544376	0.566621	0.992212	0.58915	0.921811	0.958754	0.922141	0.98311	0.9667	0.967739	0.914685	0.948193	0.544118	0.896664	0.948761	0.959571	0.55715	0.629149	0.953866	0.976808	0.555111	0.571181	0.88659	0.948942	0.625745	0.560588	0.509828	1.0328	0.861034	0.852571	0.879571	0.940829	0.930672	0.88862	0.590434	0.546382	0.944336	0.989834
MgO	12.6047	12.4066	17.161	12.5411	12.4674	16.9522	17.3172	17.3524	12.621	16.9964	17.0205	12.6628	12.4489	17.0202	12.557	17.3449	17.4772	17.2506	17.3698	17.0803	17.2738	16.5571	17.3077	12.6115	17.3627	16.4026	17.3871	12.5994	12.6092	17.4343	17.3958	12.5215	12.4863	17.3323	17.4526	12.5866	12.6604	12.4168	17.4478	17.5834	17.5392	17.4448	17.5364	17.5687	17.6051	12.7341	12.6309	16.6648	17.3695
CaO	18.5943	18.0965	1.73047	18.7557	18.5017	1.66145	1.72131	1.78231	18.5999	1.76523	2.54544	18.7434	18.399	1.72027	18.3047	1.74201	1.69455	1.73882	1.71167	1.7148	1.75957	4.33525	1.71124	18.2989	1.72106	1.68918	1.75474	18.4501	18.3789	1.66279	1.70128	18.4109	18.3079	1.6986	1.70122	18.1984	18.1323	18.386	1.73856	1.7674	1.65661	1.75333	1.73658	1.72254	1.75473	18.5292	18.1857	1.70847	1.72313
Na2O	0.284091	0.315163	0.024872	0.297394	0.315161	0.025348	0	0.03547	0.277903	0.006616	0.02228	0.32318	0.31046	0.031436	0.248401	0.037888	0	0.058992	0.047589	0	0.041581	0.064212	0.023801	0.309467	0.040592	0	0.013187	0.308041	0.261883	0	0	0.286439	0.278715	0.020248	0.048723	0.287309	0.311022	0.262604	0.064906	0.017712	0.003549	0.019744	0.027902	0.047606	0.00152	0.269229	0.290062	0.013711	0
K2O	0	0	0	0.013872	0	0.006652	0.013067	0	0.004856	0.000475	0.002371	0.00578	0.002082	0.010212	0.012032	0.010219	0	0.01569	0.004988	0.000238	0.001662	0.000237	0	0	0.001187	0.005698	0.007599	0.00185	0	0.00095	0	0.028694	0.000925	0.002138	0	0	0	0.0111	0	0	0	0.003088	0	0.008313	0	0.023595	0.016659	0.025407	0
NiO	0.047589	0.011896	0	0	0.004758	0.029558	0.013008	0	0.011901	0	0.022466	0.032136	0	0	0.024992	0.01301	0	0	0	0	0.007093	0.01894	0	0	0.062653	0	0	0	0	0	0	0	0	0.030745	0	0	0	0	0	0.024833	0.016552	0	0	0	0	0.007141	0	0	0
Total	100.559	99.8842	100.452	100.219	100.621	99.853	99.8838	100.518	100.136	100.159	100.053	100.131	100.211	100.085	99.9245	99.9936	100.494	99.748	100.763	100.246	100.191	100.31	100.273	100.371	100.909	99.2643	100.943	100.174	100.367	100.663	100.679	99.7669	100.788	100.549	101.079	100.227	100.463	99.8107	100.787	100.865	100.604	100.189	100.674	100.811	101.097	100.406	100.126	98.8489	100.821
O	6	6	6	6	6	6	6	6	6	6	6	6	6	6	6	6	6	6	6	6	6	6	6	6	6	6	6	6	6	6	6	6	6	6	6	6	6	6	6	6	6	6	6	6	6	6	6	6	6
Si	1.94951	1.95226	1.96582	1.95618	1.95079	1.97551	1.96771	1.96408	1.95447	1.96184	1.9617	1.95283	1.95772	1.96896	1.96187	1.97246	1.96457	1.97844	1.96671	1.97343	1.96355	1.97031	1.96831	1.95746	1.96369	1.98073	1.9642	1.95233	1.95505	1.9657	1.96	1.9609	1.95724	1.97088	1.96088	1.95887	1.95633	1.95495	1.9607	1.96791	1.96158	1.96373	1.95467	1.96108	1.95921	1.95556	1.95487	1.97263	1.96452
Ti	0.01008	0.012573	0.00769	0.009888	0.010244	0.007232	0.006919	0.006297	0.009874	0.007164	0.006373	0.009638	0.010904	0.007329	0.00883	0.006602	0.007862	0.007875	0.008407	0.007215	0.007192	0.00734	0.006893	0.010288	0.007744	0.006312	0.006874	0.010411	0.00942	0.006857	0.007053	0.009477	0.011281	0.006608	0.006442	0.010963	0.010608	0.011409	0.006684	0.006398	0.00634	0.006708	0.006421	0.007146	0.006449	0.009672	0.010177	0.00657	0.007562
Al	0.040715	0.042955	0.020176	0.041261	0.042092	0.020523	0.020558	0.020832	0.041235	0.019688	0.019752	0.039675	0.042954	0.024007	0.039324	0.019288	0.022033	0.019287	0.021151	0.019039	0.019126	0.023566	0.019779	0.04118	0.019837	0.020008	0.019384	0.041916	0.038987	0.019011	0.019595	0.045128	0.044652	0.020929	0.019909	0.042523	0.043476	0.043326	0.019293	0.015642	0.018608	0.019132	0.020786	0.019695	0.018809	0.040104	0.040906	0.0204	0.020355
Cr	0	0.00087	0	0	0.00108	0	0.000753	0	0.001012	0.000752	0	0.000507	0	0	0	0.000547	0	0.000822	0.000611	0.002182	0	0	0.000205	0.000216	0	0.001033	0.000881	0.000506	0	0.003125	0.00068	0.001304	0.00122	0	0	0	0	0.000943	0	0	0.001564	0	0.002858	0	0.00149	0.000649	0	0.001661	0.000204
Fe2	0.512533	0.518867	0.93117	0.496558	0.519352	0.92413	0.918929	0.924573	0.499044	0.944783	0.912466	0.495086	0.507083	0.925131	0.503545	0.909508	0.918517	0.898989	0.918962	0.92219	0.927712	0.848934	0.921775	0.509302	0.930189	0.938332	0.928768	0.507635	0.513276	0.923057	0.93462	0.491147	0.513628	0.919859	0.934913	0.505944	0.512596	0.508851	0.928284	0.920859	0.930527	0.923757	0.931784	0.924878	0.931209	0.499129	0.514338	0.93106	0.927359
Mn	0.018833	0.019677	0.032371	0.017485	0.01764	0.030139	0.028608	0.032072	0.017882	0.030765	0.031767	0.017622	0.018326	0.032496	0.019094	0.030146	0.031245	0.030174	0.031962	0.031586	0.031694	0.029789	0.030979	0.017569	0.029159	0.03135	0.03119	0.018041	0.020343	0.031057	0.031866	0.017992	0.018373	0.028866	0.030832	0.020221	0.018084	0.016562	0.033643	0.027964	0.027801	0.028777	0.0307	0.030278	0.028852	0.019052	0.0177	0.031335	0.032201
Mg	0.716632	0.709831	0.986739	0.713587	0.708606	0.97851	0.99914	0.996463	0.718849	0.98221	0.982759	0.721467	0.708641	0.981092	0.716275	0.998344	1.00246	0.993471	0.993912	0.982226	0.995701	0.949042	0.995259	0.716705	0.99376	0.953928	0.994678	0.718043	0.717565	0.999062	0.9988	0.714304	0.706917	0.993202	0.99801	0.71587	0.718829	0.70992	1.00031	1.00507	1.00661	1.00451	1.00714	1.00598	1.00605	0.723195	0.720153	0.97324	0.994532
Ca	0.759787	0.744125	0.071512	0.767	0.755777	0.068925	0.071377	0.073559	0.761389	0.073316	0.10563	0.767517	0.752731	0.071267	0.750424	0.072063	0.069856	0.071971	0.070392	0.070873	0.072895	0.178593	0.070723	0.747398	0.070796	0.070604	0.072147	0.755701	0.751697	0.068482	0.070204	0.754838	0.744942	0.069956	0.069918	0.743894	0.739917	0.755505	0.071636	0.072607	0.068331	0.072561	0.07168	0.070887	0.072068	0.756302	0.745199	0.07171	0.070909
Na	0.021007	0.023452	0.00186	0.022008	0.023297	0.001903	0	0.002649	0.020586	0.000497	0.001673	0.023948	0.022985	0.002357	0.018428	0.002836	0	0.004419	0.003542	0	0.003117	0.004787	0.00178	0.022873	0.003022	0	0.000981	0.022832	0.019383	0	0	0.021252	0.020523	0.001509	0.003624	0.021253	0.022967	0.019527	0.00484	0.001317	0.000265	0.001479	0.002084	0.003545	0.000113	0.019886	0.021509	0.001041	0
K	0	0	0	0.000675	0	0.000329	0.000645	0	0.000237	2.3e-05	0.000117	0.000282	0.000101	0.000504	0.000587	0.000503	0	0.000773	0.000244	1.2e-05	8.2e-05	1.2e-05	0	0	5.8e-05	0.000284	0.000372	9e-05	0	4.7e-05	0	0.001401	4.5e-05	0.000105	0	0	0	0.000543	0	0	0	0.000152	0	0.000407	0	0.001147	0.000813	0.00127	0
Ni	0.00146	0.000367	0	0	0.000146	0.00092	0.000405	0	0.000366	0	0.0007	0.000988	0	0	0.000769	0.000404	0	0	0	0	0.000221	0.000586	0	0	0.001935	0	0	0	0	0	0	0	0	0.00095	0	0	0	0	0	0.000766	0.000512	0	0	0	0	0.000219	0	0	0
Total	4.03056	4.02498	4.01734	4.02464	4.02902	4.00812	4.01504	4.02053	4.02494	4.02104	4.02294	4.02956	4.02144	4.01314	4.01914	4.0127	4.01655	4.00622	4.0159	4.00875	4.02129	4.01296	4.0157	4.02299	4.02019	4.00258	4.01947	4.02751	4.02573	4.0164	4.02282	4.01774	4.01883	4.01286	4.02453	4.01953	4.02281	4.02154	4.02539	4.01853	4.02213	4.02081	4.02813	4.0239	4.02425	4.02491	4.02566	4.01092	4.01764
Enstatite	36.0306	35.9805	49.5993	36.0918	35.7208	49.6311	50.222	49.9582	36.3187	49.1029	49.117	36.363	35.9999	49.613	36.3546	50.4236	50.3538	50.573	50.1149	49.7257	49.8771	48.0146	50.0695	36.3182	49.8189	48.5988	49.8437	36.2396	36.1943	50.189	49.8497	36.4387	35.9665	50.0854	49.8297	36.4179	36.4639	35.9585	50.0096	50.2904	50.1932	50.2048	50.0915	50.2551	50.0691	36.5504	36.3771	49.2528	49.9063
Ferrosilite	25.769	26.3007	46.8061	25.1149	26.1805	46.8729	46.1902	46.3539	25.2134	47.2319	45.6038	24.9531	25.7605	46.7831	25.5575	45.9367	46.1373	45.7633	46.3358	46.6863	46.4714	42.9499	46.3726	25.8083	46.632	47.8042	46.541	25.6203	25.8898	46.3708	46.6465	25.0548	26.1324	46.3868	46.6793	25.7385	26.0024	25.7741	46.409	46.0766	46.3995	46.1686	46.3434	46.2036	46.3442	25.226	25.9807	47.1182	46.5355
Wollastonite	38.2004	37.7188	3.59461	38.7933	38.0987	3.49595	3.58778	3.68792	38.4679	3.66523	5.27924	38.684	38.2397	3.60391	38.0879	3.6397	3.50888	3.66371	3.5493	3.58798	3.65149	9.03551	3.55793	37.8735	3.54913	3.59699	3.61532	38.1402	37.9159	3.44027	3.50385	38.5065	37.9011	3.52776	3.49094	37.8436	37.5337	38.2674	3.5814	3.63301	3.40724	3.62654	3.56509	3.54126	3.58667	38.2236	37.6422	3.62903	3.55826
total	100	100	100	100	100	100	100	100	100	100	100	100	100	100	100	100	100	100	100	100	100	100	100	100	100	100	100	100	100	100	100	100	100	100	100	100	100	100	100	100	100	100	100	100	100	100	100	100	100
Mg#	58.3023	57.771	51.4487	58.9671	57.706	51.4291	52.0909	51.8711	59.024	50.9711	51.8545	59.3042	58.2896	51.4679	58.7197	52.3282	52.1849	52.4963	51.9591	51.5762	51.7674	52.7839	51.9166	58.4585	51.6521	50.4121	51.7133	58.5833	58.2988	51.9771	51.6598	59.2562	57.9181	51.9169	51.6322	58.5908	58.3738	58.2488	51.8672	52.1863	51.9638	52.094	51.9433	52.1001	51.9317	59.1656	58.336	51.1075	51.7476
Lincoln Reservoir Member
	RC-10.1-008
	pigeonite	pigeonite	pigeonite	pigeonite	pigeonite	pigeonite	pigeonite	pigeonite	pigeonite	pigeonite	pigeonite	pigeonite	pigeonite	pigeonite	pigeonite	pigeonite	pigeonite	pigeonite	pigeonite	pigeonite	pigeonite	pigeonite	pigeonite	pigeonite	pigeonite	pigeonite	pigeonite	pigeonite	pigeonite	pigeonite	pigeonite	pigeonite	pigeonite	pigeonite	pigeonite	pigeonite	pigeonite	pigeonite	pigeonite	augite	augite	augite	augite	augite	augite	augite	augite	augite	augite
	rim	core	core	rim	core	rim	rim	core	rim	core	core	core	core	core	rim	core	rim	core	rim	core	rim	core	rim	core	rim	rim	core	rim	core	core	core	rim	core	core	rim	core	core	core	core	rim	core	core	rim	rim	rim	rim	rim	core	rim
	cluster	cluster	cluster	cluster	single	single	single	single	cluster	cluster	single	single	cluster	single	single	single	single	cluster	cluster	single	cluster	cluster	single	single	single	single	single	single	cluster	cluster	cluster	single	single	single	single	single	cluster	cluster	single	cluster	cluster	cluster	single	single	single	single	cluster	cluster	single
SiO2	49.1253	49.4562	49.0734	49.2111	49.1311	49.3921	49.3188	49.1658	49.2226	48.9416	48.651	48.407	49.1754	49.1893	48.9325	49.3454	49.0509	48.9729	47.8139	47.4349	49.2805	49.1237	49.222	49.1727	49.3425	49.7929	48.9158	49.7247	49.6863	49.5286	49.8425	50.0405	50.4537	49.5345	49.6657	49.8911	49.577	49.7431	44.7811	49.7576	50.0374	50.166	48.4254	49.8802	50.0754	50.2525	49.1274	49.7107	49.0896
TiO2	0.22175	0.26666	0.28001	0.26256	0.17573	0.27843	0.3224	0.22519	0.24046	0.22141	0.30303	0.27069	0.27831	0.17333	0.21989	0.25036	0.24068	0.24725	0.2313	0.24353	0.30386	0.27565	0.24125	0.19754	0.24675	0.2302	0.28617	0.28956	0.21179	0.21969	0.2546	0.2215	0.2562	0.18248	0.2707	0.26291	0.25096	0.28884	0.29477	0.23651	0.32168	0.29634	0.65832	0.34748	0.31996	0.39785	0.40832	0.39909	0.39201
Al2O3	0.38862	0.39161	0.38624	0.43283	0.38302	0.37987	0.40258	0.60493	0.40263	0.39146	0.48733	0.39992	0.42374	0.3916	0.42723	0.37472	0.70583	0.42843	0.47059	0.54478	0.47779	0.46721	0.40655	0.44205	0.43554	0.49201	0.48417	0.51838	0.52502	0.51643	0.5226	0.52675	0.50911	0.47757	0.53528	0.51602	0.544	0.50188	0.43646	0.82251	0.74558	0.79006	1.28076	0.84051	0.78431	0.78218	0.98293	0.95723	0.80964
Cr2O3	1e-05	0.00421	1e-05	1e-05	0.00388	0.01803	1e-05	0.01308	1e-05	0.00791	0.01127	0.00363	0.01679	0.00107	0.00783	1e-05	0.01598	1e-05	0.01419	1e-05	0.0057	1e-05	0.00447	1e-05	1e-05	1e-05	0.01501	1e-05	0.03211	1e-05	1e-05	1e-05	0.00544	0.00635	1e-05	0.01292	1e-05	1e-05	1e-05	0.0105	0.00933	0.01398	0.01586	1e-05	0.00223	1e-05	1e-05	0.01288	0.00376
FeO	35.952	35.8711	35.4147	35.6064	35.8452	35.3921	35.3332	34.8562	35.7416	35.4075	34.6284	35.0599	35.5583	35.3808	35.7093	35.3709	33.4638	35.699	35.1408	34.0209	34.9158	34.8642	35.483	35.6163	35.1217	33.3076	33.2096	33.3379	33.5151	33.3853	33.3991	33.5833	33.6453	33.7833	33.6041	33.4887	33.2468	33.8303	34.8213	26.2851	24.0426	24.0852	23.7152	24.4578	23.5598	23.8404	23.6297	23.6735	24.1212
MnO	1.17726	1.16317	1.20002	1.18532	1.20058	1.18231	1.17372	1.17503	1.20142	1.18285	1.14475	1.1594	1.1808	1.14075	1.18383	1.21651	1.1432	1.1365	1.18002	1.12241	1.15866	1.15075	1.18638	1.19173	1.19795	1.05747	1.11712	1.088	1.10112	1.1023	1.12337	1.1084	1.11191	1.11284	1.14871	1.12189	1.07902	1.09207	1.12924	0.84318	0.77371	0.77157	0.73336	0.79702	0.77753	0.76618	0.75844	0.78096	0.74336
MgO	8.89633	8.92224	8.93677	8.87583	9.06557	8.92699	8.95663	8.72904	8.90022	8.90406	8.77569	8.74385	8.97885	8.94575	8.82823	8.92794	8.63212	8.9921	8.82305	8.37321	9.11344	9.11078	8.86506	8.93478	8.98334	10.1276	10.2725	10.2436	10.1704	10.1164	10.2449	10.3613	10.282	10.156	10.1388	10.3636	10.1863	10.2237	10.6662	7.85426	7.78893	7.81999	7.53391	7.9167	7.84964	7.73149	7.65561	7.905	7.67617
CaO	4.84952	4.81637	5.00324	5.0324	4.85757	4.87103	4.94033	4.85715	4.9763	5.04308	4.91245	4.9569	5.14097	4.88067	4.86289	4.90551	6.18171	4.85566	4.85225	6.03928	5.20521	5.51472	4.91389	4.93765	4.89786	5.17527	5.19479	5.13141	5.2212	5.28295	5.07978	5.10481	5.11326	5.2269	5.18135	5.12079	5.16002	5.11325	4.58413	13.5621	16.5348	16.7588	17.0904	16.2648	16.7472	16.7948	16.3132	16.5142	16.1274
Na2O	0.0944	0.07018	0.05293	0.07617	0.03765	0.07957	0.06523	0.0755	0.07651	0.06978	0.05605	0.05973	0.06665	0.0661	0.07135	0.08033	0.1064	0.05708	0.08946	0.09428	0.09489	0.05265	0.05522	0.04616	0.06791	0.09924	0.09416	0.06236	0.07028	0.0634	0.04695	0.07862	0.0923	0.07574	0.06622	0.07256	0.06324	0.07045	0.27387	0.18997	0.20802	0.24229	0.23792	0.22582	0.20192	0.21545	0.23652	0.2268	0.23749
K2O	1e-05	1e-05	1e-05	1e-05	1e-05	1e-05	1e-05	0.00983	1e-05	1e-05	1e-05	1e-05	1e-05	1e-05	1e-05	1e-05	0.02189	1e-05	1e-05	0.00411	1e-05	1e-05	1e-05	1e-05	1e-05	1e-05	1e-05	1e-05	1e-05	1e-05	1e-05	1e-05	1e-05	1e-05	1e-05	1e-05	1e-05	1e-05	1e-05	1e-05	1e-05	1e-05	1e-05	1e-05	1e-05	1e-05	1e-05	1e-05	1e-05
NiO	0.00191	0.0085	0.01285	1e-05	1e-05	1e-05	0.00616	0.00569	1e-05	0.00625	0.01756	0.00591	0.01388	0.00416	0.0149	0.00297	1e-05	1e-05	0.007	1e-05	1e-05	0.01631	0.00192	1e-05	1e-05	0.0052	1e-05	0.0095	1e-05	1e-05	1e-05	0.00743	0.00397	1e-05	1e-05	0.01194	0.00528	0.00612	1e-05	1e-05	0.01296	1e-05	0.00085	0.00119	0.00523	1e-05	0.00238	0.00047	1e-05
Total	100.707	100.97	100.36	100.683	100.7	100.52	100.519	99.7174	100.762	100.176	98.9875	99.067	100.834	100.174	100.258	100.475	99.5626	100.389	98.6225	97.8775	100.556	100.576	100.38	100.539	100.294	100.287	99.5894	100.405	100.533	100.215	100.514	101.033	101.473	100.556	100.611	100.862	100.113	100.87	96.9871	99.5617	100.475	100.944	99.692	100.732	100.323	100.781	99.1145	100.181	99.2008
O	6	6	6	6	6	6	6	6	6	6	6	6	6	6	6	6	6	6	6	6	6	6	6	6	6	6	6	6	6	6	6	6	6	6	6	6	6	6	6	6	6	6	6	6	6	6	6	6	6
Si	1.98	1.9845	1.9815	1.9815	1.9785	1.9875	1.9845	1.9905	1.9815	1.98	1.986	1.98	1.977	1.9875	1.98	1.9875	1.9845	1.9785	1.9695	1.968	1.98	1.9755	1.986	1.9815	1.9875	1.9875	1.9725	1.983	1.9815	1.9815	1.986	1.983	1.989	1.9785	1.98	1.9815	1.983	1.9785	1.893	1.9845	1.9725	1.9695	1.932	1.965	1.974	1.9725	1.9635	1.9635	1.9635
Ti	0.006	0.0075	0.009	0.0075	0.006	0.009	0.0105	0.0075	0.0075	0.006	0.009	0.009	0.009	0.006	0.006	0.0075	0.0075	0.0075	0.0075	0.0075	0.009	0.009	0.0075	0.006	0.0075	0.0075	0.009	0.009	0.006	0.006	0.0075	0.006	0.0075	0.006	0.0075	0.0075	0.0075	0.009	0.009	0.0075	0.009	0.009	0.0195	0.0105	0.009	0.012	0.012	0.012	0.012
Al	0.018	0.018	0.018	0.021	0.018	0.018	0.0195	0.0285	0.0195	0.018	0.024	0.0195	0.0195	0.018	0.021	0.018	0.033	0.021	0.0225	0.027	0.0225	0.0225	0.0195	0.021	0.021	0.0225	0.0225	0.024	0.024	0.024	0.024	0.024	0.024	0.0225	0.0255	0.024	0.0255	0.024	0.021	0.039	0.0345	0.036	0.06	0.039	0.036	0.036	0.0465	0.045	0.0375
Cr	0	0	0	0	0	0	0	0	0	0	0	0	0	0	0	0	0	0	0	0	0	0	0	0	0	0	0	0	0.0015	0	0	0	0	0	0	0	0	0	0	0	0	0	0	0	0	0	0	0	0
Fe2	1.212	1.203	1.1955	1.1985	1.2075	1.191	1.1895	1.1805	1.203	1.1985	1.182	1.2	1.1955	1.1955	1.209	1.191	1.1325	1.206	1.2105	1.1805	1.173	1.173	1.197	1.2	1.1835	1.1115	1.119	1.1115	1.1175	1.1175	1.113	1.113	1.11	1.128	1.1205	1.113	1.1115	1.125	1.2315	0.876	0.792	0.7905	0.792	0.8055	0.777	0.783	0.7905	0.7815	0.807
Mn	0.0405	0.039	0.0405	0.0405	0.0405	0.0405	0.0405	0.0405	0.0405	0.0405	0.039	0.0405	0.0405	0.039	0.0405	0.042	0.039	0.039	0.0405	0.039	0.039	0.039	0.0405	0.0405	0.0405	0.036	0.0375	0.0375	0.0375	0.0375	0.0375	0.0375	0.0375	0.0375	0.039	0.0375	0.036	0.0375	0.0405	0.0285	0.0255	0.0255	0.0255	0.027	0.0255	0.0255	0.0255	0.0255	0.0255
Mg	0.534	0.534	0.5385	0.5325	0.5445	0.5355	0.537	0.5265	0.534	0.537	0.534	0.534	0.5385	0.5385	0.5325	0.5355	0.5205	0.5415	0.5415	0.5175	0.546	0.546	0.5325	0.537	0.54	0.603	0.618	0.609	0.6045	0.603	0.609	0.612	0.6045	0.6045	0.603	0.6135	0.6075	0.606	0.672	0.4665	0.4575	0.4575	0.4485	0.465	0.4605	0.453	0.456	0.465	0.4575
Ca	0.21	0.207	0.216	0.2175	0.21	0.21	0.213	0.21	0.2145	0.219	0.2145	0.2175	0.222	0.2115	0.2115	0.2115	0.2685	0.21	0.2145	0.2685	0.2235	0.237	0.213	0.213	0.2115	0.222	0.225	0.219	0.2235	0.2265	0.2175	0.2175	0.216	0.2235	0.222	0.2175	0.2205	0.2175	0.207	0.579	0.699	0.705	0.7305	0.687	0.7065	0.7065	0.699	0.699	0.6915
Na	0.0075	0.006	0.0045	0.006	0.003	0.006	0.0045	0.006	0.006	0.006	0.0045	0.0045	0.0045	0.0045	0.006	0.006	0.009	0.0045	0.0075	0.0075	0.0075	0.0045	0.0045	0.003	0.006	0.0075	0.0075	0.0045	0.006	0.0045	0.003	0.006	0.0075	0.006	0.0045	0.006	0.0045	0.006	0.0225	0.015	0.0165	0.018	0.018	0.0165	0.015	0.0165	0.018	0.018	0.018
K	0	0	0	0	0	0	0	0	0	0	0	0	0	0	0	0	0.0015	0	0	0	0	0	0	0	0	0	0	0	0	0	0	0	0	0	0	0	0	0	0	0	0	0	0	0	0	0	0	0	0
Ni	0	0	0	0	0	0	0	0	0	0	0	0	0	0	0	0	0	0	0	0	0	0	0	0	0	0	0	0	0	0	0	0	0	0	0	0	0	0	0	0	0	0	0	0	0	0	0	0	0
Total	4.008	4.0005	4.0035	4.0035	4.008	3.9975	3.999	3.9915	4.005	4.0065	3.9945	4.0035	4.0065	4.0005	4.0065	3.999	3.996	4.0065	4.0155	4.0155	4.002	4.0065	3.999	4.0035	3.9975	3.9975	4.011	3.999	4.002	4.002	3.996	4.0005	3.9945	4.008	4.002	4.002	3.999	4.0035	4.098	3.996	4.008	4.0125	4.026	4.014	4.0065	4.005	4.011	4.011	4.014
Enstatite	27.3006	27.4691	27.6154	27.3287	27.7523	27.653	27.6875	27.4648	27.3636	27.4751	27.6612	27.3636	27.5307	27.6793	27.2657	27.6316	27.0882	27.6628	27.5362	26.3158	28.1081	27.9141	27.4131	27.5385	27.907	31.1387	31.4985	31.3998	31.0717	30.9707	31.3998	31.5058	31.3131	30.9049	30.9946	31.5586	31.3225	31.1008	31.8408	24.2779	23.4796	23.4255	22.7549	23.7548	23.6883	23.3205	23.4387	23.9013	23.3896
Ferrosilite	61.9632	61.8827	61.3077	61.5089	61.5443	61.5027	61.3302	61.5806	61.6449	61.32	61.2277	61.4912	61.1196	61.4495	61.9048	61.4551	58.9383	61.6092	61.5561	60.0305	60.3861	59.9693	61.6216	61.5385	61.1628	57.3974	57.0336	57.3086	57.4402	57.396	57.3859	57.2973	57.4981	57.6687	57.5944	57.2531	57.3086	57.7367	58.3511	45.5894	40.6467	40.4762	40.1826	41.1494	39.9691	40.3089	40.6322	40.1696	41.2577
Wollastonite	10.7362	10.6481	11.0769	11.1624	10.7034	10.8443	10.9822	10.9546	10.9915	11.2049	11.1111	11.1453	11.3497	10.8712	10.8295	10.9133	13.9735	10.728	10.9077	13.6537	11.5058	12.1166	10.9653	10.9231	10.9302	11.464	11.4679	11.2916	11.488	11.6333	11.2142	11.1969	11.1888	11.4264	11.4109	11.1883	11.3689	11.1624	9.8081	30.1327	35.8737	36.0983	37.0624	35.0958	36.3426	36.3707	35.9291	35.9291	35.3528
total	100	100	100	100	100	100	100	100	100	100	100	100	100	100	100	100	100	100	100	100	100	100	100	100	100	100	100	100	100	100	100	100	100	100	100	100	100	100	100	100	100	100	100	100	100	100	100	100	100
Mg#	30.5842	30.7427	31.0554	30.7626	31.0788	31.0165	31.1034	30.8436	30.7427	30.9421	31.1189	30.7958	31.0554	31.0554	30.5771	31.0165	31.4882	30.9871	30.9075	30.477	31.7627	31.7627	30.7892	30.9154	31.3316	35.1706	35.5786	35.3967	35.1045	35.048	35.3659	35.4783	35.2581	34.8918	34.9869	35.5343	35.3403	35.0087	35.3034	34.7486	36.6146	36.6587	36.1548	36.5998	37.2121	36.6505	36.5824	37.3045	36.1803
McMullen Creek Member
	RC-10.1-005
	pigeonite	pigeonite	pigeonite	pigeonite	pigeonite	pigeonite	pigeonite	pigeonite	pigeonite	pigeonite	pigeonite	pigeonite	pigeonite	pigeonite	pigeonite	pigeonite	pigeonite	pigeonite	pigeonite	pigeonite	pigeonite	pigeonite	pigeonite	pigeonite	pigeonite	pigeonite	pigeonite	pigeonite	pigeonite	pigeonite	pigeonite	pigeonite	pigeonite	pigeonite	pigeonite	pigeonite	pigeonite	pigeonite	pigeonite	pigeonite	pigeonite	pigeonite	augite	augite	augite	augite	augite	augite	augite
	core	core	rim	core	rim	core	rim	core	core	rim	core	core	rim	core	core	rim	rim core	core	core	core	core	core	rim	core	core	rim	core	rim	core	core	rim	core	rim	core	rim	core	core	core	core	rime	core	core	core	core	core	rim	core	core	core
	cluster	single	single	single	single	cluster	cluster	cluster	single	single	cluster	single	cluster	cluster	cluster	cluster	cluster	cluster	cluster	cluster	cluster	single	single	single	single	single	single	single	single	single	single	single	cluster	cluster	cluster	cluster	cluster	cluster	single	single	single	single	single	single	single	cluster	cluster	cluster	cluster
SiO2	49.712	49.71	49.22	49.537	49.344	49.465	49.229	49.831	49.68	49.699	49.792	49.321	49.462	49.148	49.898	49.668	49.759	49.47	49.784	49.1	49.771	47.4358	49.0613	48.963	48.0095	47.4177	47.5012	48.6313	48.8647	48.5254	48.6375	47.928	47.0948	47.8348	49.1003	48.8982	47.9859	47.9702	48.5416	49.2621	49.1276	49.5039	48.8475	49.0806	48.5537	48.215	48.7936	47.6646	50.0739
TiO2	0.18	0.192	0.165	0.164	0.262	0.203	0.306	0.27	0.228	0.183	0.165	0.1	0.324	0.328	0.166	0.214	0.224	0.18	0.231	0.231	0.231	0.28757	0.2475	0.28624	0.22239	0.23058	0.21539	0.2316	0.18769	0.18951	0.23938	0.29796	0.2345	0.16458	0.2058	0.20981	0.23981	0.2276	0.28732	0.21851	0.21527	0.23583	0.47514	0.33257	0.38393	0.2657	0.44444	0.31641	0.39984
Al2O3	0.346	0.379	0.388	0.379	0.424	0.399	0.45	0.632	0.373	0.399	0.461	0.361	0.791	0.614	0.28	0.347	0.391	0.363	0.356	0.465	0.38	0.67855	0.45564	0.45551	0.38749	0.36871	0.38627	0.37044	0.36783	0.38586	0.37826	0.42022	0.36364	0.36066	0.3809	0.40566	0.39663	0.34303	0.51941	0.34378	0.35643	0.41492	1.01849	0.79657	0.9389	0.62558	1.01929	0.76665	0.9206
Cr2O3	0	0	0	0	0.035	0	0	0	0.006	0.018	0.042	0	0.037	0	0	0.024	0	0	0.026	0.009	0.018	0.0169	1e-05	0.00627	1e-05	0.00179	0.00596	0.00504	1e-05	1e-05	0.00298	1e-05	1e-05	1e-05	0.0269	1e-05	1e-05	1e-05	0.00417	1e-05	0.00264	1e-05	0.00761	1e-05	0.01147	0.00262	0.00192	1e-05	0.00803
FeO	33.353	33.689	33.378	33.8	33.349	33.382	32.581	28.943	32.956	33.025	33.346	31.99	27.229	29.856	32.88	32.668	33.819	33.73	33.413	33.327	31.998	33.3855	32.923	34.3024	34.4083	34.5913	34.3911	34.4415	34.5778	34.3266	34.3333	34.196	33.5342	34.2523	34.6236	34.4642	33.9501	34.1825	32.5172	34.8972	34.7389	33.8305	22.7924	26.2839	23.4282	30.3075	21.8134	27.3903	19.2033
MnO	1.08	1.102	1.014	1.035	1.109	1.049	1.068	1.036	1.092	1.147	1.035	1.062	0.848	0.962	1.098	1.042	0.958	1.076	1.11	1.055	0.968	1.01523	1.00159	1.05045	1.07662	1.04701	1.03856	1.04696	1.07325	1.07836	1.0427	1.04187	1.02369	1.09875	1.08008	1.07774	1.04644	1.06967	1.01157	1.09985	1.03867	1.04007	0.70467	0.81058	0.68947	0.92123	0.64301	0.80386	0.57566
MgO	10.622	10.604	10.349	10.698	10.552	10.621	10.521	9.864	10.483	10.609	10.409	10.692	9.975	10.079	11.57	10.326	10.709	10.462	10.706	10.748	11.43	9.90549	10.1335	10.2671	10.2749	10.4996	10.4072	10.5444	10.3831	10.3336	10.1021	10.3555	10.1539	10.4142	10.3346	10.2706	10.1378	10.3482	10.0392	10.4721	10.4267	10.0945	9.1417	9.49236	9.13504	9.7875	8.91983	9.31069	10.1181
CaO	4.23	4.279	4.355	4.29	4.317	4.701	4.708	8.767	4.572	4.199	4.23	4.094	9.842	8.412	3.943	4.646	4.264	4.416	4.472	4.561	4.416	4.4366	5.62102	4.60194	4.35978	3.95763	3.92079	3.87421	4.10561	4.40691	4.50531	4.4342	5.20174	4.07148	4.39801	4.40298	4.58877	4.17045	5.96084	3.93158	4.09321	4.98616	15.5397	11.9817	15.0523	8.09182	16.7657	11.4855	17.7504
Na2O	0.066	0.068	0.126	0.077	0.036	0.084	0.054	0.182	0.086	0.047	0.11	0.026	0.211	0.107	0.103	0.01	0.072	0.011	0.057	0.029	0.016	0.04978	0.07553	0.08926	0.04794	0.07976	0.06152	0.06024	0.05038	0.07752	0.07493	0.09286	0.07895	0.05569	0.0593	0.0534	0.05795	0.09628	0.09203	0.06459	0.04527	0.10621	0.24041	0.17101	0.19624	0.11506	0.24348	0.15135	0.23335
K2O	0	0.01	0.007	0	0.001	0.011	0.01	0.016	0.025	0.01	0.038	0.04	0	0.031	0	0.068	0	0.009	0	0	0.006	0.05693	1e-05	1e-05	1e-05	1e-05	1e-05	1e-05	1e-05	1e-05	1e-05	1e-05	1e-05	1e-05	1e-05	1e-05	1e-05	1e-05	1e-05	1e-05	1e-05	1e-05	1e-05	1e-05	1e-05	1e-05	1e-05	1e-05	1e-05
NiO	0	0	0	0	0.01	0	0.009	0	0	0	0	0	0.027	0.002	0.023	0.047	0.038	0	0.034	0	0	1e-05	0.00597	0.00779	1e-05	1e-05	0.01277	1e-05	1e-05	0.00745	1e-05	0.00931	0.00702	1e-05	0.00799	1e-05	1e-05	1e-05	1e-05	0.017	1e-05	1e-05	0.00134	0.00945	0.00326	1e-05	1e-05	1e-05	1e-05
Total	99.589	100.033	99.002	99.98	99.439	99.915	98.936	99.541	99.501	99.336	99.628	97.686	98.746	99.539	99.961	99.06	100.234	99.717	100.189	99.525	99.234	97.2683	99.5251	100.03	98.7869	98.1942	97.9408	99.2057	99.6104	99.3312	99.3164	98.7759	97.6925	98.2524	100.218	99.7827	98.4034	98.408	98.9734	100.307	100.045	100.212	98.7689	98.9587	98.3925	98.3321	98.6447	97.8893	99.2832
O	6	6	6	6	6	6	6	6	6	6	6	6	6	6	6	6	6	6	6	6	6	6	6	6	6	6	6	6	6	6	6	6	6	6	6	6	6	6	6	6	6	6	6	6	6	6	6	6	6
Si	1.99452	1.98906	1.99044	1.98474	1.98564	1.98246	1.9869	1.98594	1.9941	1.9965	1.99644	2.00682	1.97868	1.96824	1.98852	2.00052	1.98672	1.98786	1.98744	1.9761	1.99146	1.9635	1.977	1.971	1.9635	1.953	1.959	1.9725	1.9755	1.9695	1.974	1.959	1.95	1.965	1.974	1.974	1.9665	1.9665	1.9695	1.977	1.977	1.983	1.9485	1.965	1.9485	1.962	1.947	1.944	1.9605
Ti	0.00546	0.00576	0.00504	0.00492	0.00792	0.00612	0.0093	0.0081	0.0069	0.00552	0.00498	0.00306	0.00972	0.0099	0.00498	0.00648	0.00672	0.00546	0.00696	0.00702	0.00696	0.009	0.0075	0.009	0.0075	0.0075	0.006	0.0075	0.006	0.006	0.0075	0.009	0.0075	0.0045	0.006	0.006	0.0075	0.0075	0.009	0.006	0.006	0.0075	0.015	0.0105	0.012	0.0075	0.0135	0.009	0.012
Al	0.01638	0.01788	0.01848	0.01788	0.0201	0.01884	0.02142	0.0297	0.01764	0.0189	0.02178	0.01734	0.03732	0.02898	0.01314	0.0165	0.01842	0.01722	0.01674	0.02208	0.01794	0.033	0.021	0.021	0.018	0.018	0.0195	0.018	0.018	0.018	0.018	0.0195	0.018	0.018	0.018	0.0195	0.0195	0.0165	0.0255	0.0165	0.0165	0.0195	0.048	0.0375	0.045	0.03	0.048	0.0375	0.042
Cr	0	0	0	0	0.00114	0	0	0	0.00018	0.0006	0.00132	0	0.0012	0	0	0.00078	0	0	0.00084	0.0003	0.00054	0	0	0	0	0	0	0	0	0	0	0	0	0	0.0015	0	0	0	0	0	0	0	0	0	0	0	0	0	0
Fe2	1.11912	1.12734	1.1289	1.13256	1.12236	1.11894	1.09974	0.96468	1.10628	1.10952	1.11822	1.08858	0.91098	0.99996	1.09584	1.10046	1.12926	1.13352	1.11558	1.12176	1.07076	1.1565	1.11	1.155	1.176	1.1925	1.1865	1.1685	1.1685	1.1655	1.1655	1.1685	1.161	1.176	1.164	1.164	1.164	1.1715	1.1025	1.1715	1.1685	1.134	0.7605	0.8805	0.786	1.032	0.7275	0.9345	0.6285
Mn	0.03672	0.03738	0.03474	0.0351	0.0378	0.03564	0.03654	0.03498	0.03714	0.03906	0.03516	0.0366	0.02874	0.03264	0.03708	0.03558	0.0324	0.0366	0.03756	0.03594	0.03282	0.036	0.0345	0.036	0.0375	0.036	0.036	0.036	0.0375	0.0375	0.036	0.036	0.036	0.0375	0.0375	0.0375	0.036	0.0375	0.0345	0.0375	0.036	0.036	0.024	0.027	0.024	0.0315	0.021	0.0285	0.0195
Mg	0.63528	0.63252	0.62388	0.63894	0.633	0.63456	0.633	0.58602	0.62724	0.63534	0.62214	0.64854	0.59484	0.60168	0.6873	0.61998	0.63738	0.6267	0.63714	0.64482	0.68178	0.612	0.609	0.6165	0.6255	0.645	0.6405	0.6375	0.6255	0.6255	0.6105	0.6315	0.627	0.6375	0.6195	0.618	0.6195	0.633	0.6075	0.627	0.6255	0.603	0.543	0.567	0.546	0.594	0.531	0.5655	0.591
Ca	0.18186	0.18348	0.1887	0.1842	0.18612	0.2019	0.20358	0.3744	0.19662	0.18072	0.18174	0.1785	0.42186	0.36096	0.16836	0.20052	0.1824	0.19014	0.19128	0.19668	0.1893	0.1965	0.243	0.198	0.1905	0.174	0.174	0.168	0.1785	0.192	0.1965	0.1935	0.231	0.1785	0.189	0.1905	0.201	0.183	0.2595	0.1695	0.177	0.2145	0.6645	0.5145	0.648	0.3525	0.717	0.5025	0.744
Na	0.00516	0.00528	0.0099	0.006	0.00282	0.00654	0.0042	0.01404	0.00672	0.00366	0.00858	0.00204	0.01638	0.00828	0.00798	0.00078	0.00558	0.00084	0.00444	0.00228	0.00126	0.0045	0.006	0.0075	0.0045	0.006	0.0045	0.0045	0.0045	0.006	0.006	0.0075	0.006	0.0045	0.0045	0.0045	0.0045	0.0075	0.0075	0.0045	0.003	0.009	0.018	0.0135	0.015	0.009	0.0195	0.012	0.018
K	0	0.00054	0.00036	0	6e-05	0.00054	0.00054	0.00084	0.00126	0.00054	0.00192	0.0021	0	0.00156	0	0.00348	0	0.00048	0	0	0.0003	0.003	0	0	0	0	0	0	0	0	0	0	0	0	0	0	0	0	0	0	0	0	0	0	0	0	0	0	0
Ni	0	0	0	0	0.0003	0	0.0003	0	0	0	0	0	0.00084	6e-05	0.00072	0.0015	0.0012	0	0.00108	0	0	0	0	0	0	0	0	0	0	0	0	0	0	0	0	0	0	0	0	0	0	0	0	0	0	0	0	0	0
Total	3.99444	3.99912	4.00038	4.00434	3.99726	4.00554	3.99546	3.99858	3.99408	3.9903	3.99228	3.98352	4.00056	4.01232	4.00392	3.98652	4.00014	3.99876	3.999	4.00692	3.99312	4.014	4.008	4.0125	4.023	4.0335	4.026	4.014	4.0125	4.0185	4.0125	4.026	4.0365	4.023	4.0125	4.0125	4.0185	4.0215	4.014	4.011	4.0095	4.0035	4.0215	4.014	4.0245	4.0185	4.0245	4.0335	4.0155
Enstatite	32.8096	32.5481	32.1342	32.6707	32.604	32.4517	32.6909	30.441	32.4971	32.9947	32.3677	33.8554	30.8578	30.6573	35.2191	32.2745	32.7023	32.1325	32.7747	32.8444	35.11	31.145	31.0398	31.3024	31.4006	32.0656	32.009	32.2948	31.711	31.5431	30.9506	31.678	31.055	32.003	31.4068	31.3308	31.2169	31.8491	30.8454	31.8598	31.7352	30.8993	27.5915	28.8991	27.5758	30.0227	26.8793	28.2397	30.0993
Ferrosilite	57.798	58.0104	58.1464	57.9107	57.8095	57.2231	56.7954	50.1106	57.316	57.62	58.177	56.8265	47.2578	50.9508	56.1537	57.287	57.9393	58.1185	57.3858	57.1376	55.1415	58.855	56.5749	58.6443	59.0361	59.2841	59.2954	59.1945	59.2395	58.7746	59.0875	58.6155	57.5037	59.0361	59.0114	59.0114	58.6546	58.9434	55.9787	59.5274	59.2846	58.1091	38.6433	44.8777	39.697	52.1607	36.8261	46.6667	32.0092
Wollastonite	9.39233	9.44148	9.71939	9.41862	9.5865	10.3253	10.5138	19.4483	10.1868	9.38522	9.45528	9.31813	21.8843	18.3919	8.62721	10.4385	9.35845	9.74897	9.83951	10.018	9.74849	10	12.3853	10.0533	9.56325	8.65026	8.69565	8.51064	9.04943	9.6823	9.96198	9.70655	11.4413	8.96084	9.58175	9.65779	10.1285	9.20755	13.1759	8.6128	8.98021	10.9915	33.7652	26.2232	32.7273	17.8165	36.2946	25.0936	37.8915
total	100	100	100	100	100	100	100	100	100	100	100	100	100	100	100	100	100	100	100	100	100	100	100	100	100	100	100	100	100	100	100	100	100	100	100	100	100	100	100	100	100	100	100	100	100	100	100	100	100
Mg#	36.2107	35.9415	35.5937	36.0677	36.061	36.1882	36.5317	37.7907	36.183	36.4121	35.7478	37.3342	39.5027	37.5665	38.5444	36.0361	36.0787	35.6035	36.3515	36.501	38.9024	34.6056	35.4276	34.801	34.7211	35.102	35.0575	35.299	34.8662	34.9246	34.375	35.0833	35.0671	35.153	34.7351	34.6801	34.7351	35.079	35.5263	34.8624	34.8662	34.715	41.6571	39.171	40.991	36.5314	42.1931	37.7	48.4625
Indian Springs Member
	RC-10.1-010
	pigeonite	pigeonite	pigeonite	pigeonite	pigeonite	pigeonite	pigeonite	pigeonite	pigeonite	pigeonite	pigeonite	pigeonite	pigeonite	pigeonite	pigeonite	pigeonite	pigeonite	pigeonite	pigeonite	pigeonite	pigeonite	pigeonite	pigeonite	pigeonite	pigeonite	pigeonite	pigeonite	pigeonite	pigeonite	pigeonite	pigeonite	pigeonite	pigeonite	pigeonite	augite	augite	augite	augite	augite	augite	augite	augite
	core	core	core	core	rim	core	rim	rim	core	rim	core	core	rim	core	core	core	core	core	core	rim	core	rim	core	core	core	core	core	rim	rim	rim	core	rim	core	core	core	core	core	core	rim	core	core	core
	single	single	single	single	single	single	single	single	single	single	single	single	single	single	single	single	single	single	single	single	single	single	single	single	single	single	single	single	single	single	single	single	single	single	single	single	single	single	single	single	single	single
SiO2	49.591	49.806	49.961	49.772	49.918	49.399	49.724	49.391	49.792	50.283	49.542	50.271	49.275	49.509	49.825	49.3353	48.168	47.4232	49.5615	47.5894	47.1587	48.6165	48.9846	48.088	47.8886	48.511	46.0815	48.3824	47.0559	48.1001	48.8197	48.3143	48.9383	48.5185	49.7928	49.3632	48.21	49.1887	48.5324	48.6274	49.0172	50.522
TiO2	0.132	0.229	0.102	0.199	0.223	0.173	0.172	0.142	0.201	0.141	0.224	0.248	0.177	0.242	0.105	0.30821	0.17609	0.21047	0.23483	0.25578	0.23871	0.24493	0.22145	0.35829	0.2821	0.22589	0.216	0.21878	0.20054	0.20826	0.14524	0.21672	0.17724	0.17201	0.35792	0.36196	0.49713	0.43322	0.41595	0.42952	0.42526	0.33
Al2O3	0.424	0.306	0.208	0.277	0.381	0.365	0.398	0.416	0.412	0.358	0.353	0.508	0.373	0.439	0.352	0.41637	0.38378	0.36892	0.41523	0.42192	0.67055	0.35074	0.35168	0.38411	0.4172	0.37188	0.95405	0.25991	0.63661	0.36045	0.36801	0.36409	0.36491	0.36593	0.8801	0.84744	1.00715	1.24423	0.93924	0.88724	0.88617	0.857
Cr2O3	0	0	0.065	0	0.028	0	0.033	0.016	0	0.031	0	0.025	0	0	0	1e-05	0.01112	1e-05	1e-05	0.01293	1e-05	1e-05	1e-05	0.02957	1e-05	0.01357	1e-05	1e-05	0.0299	1e-05	0.01176	1e-05	1e-05	0.00142	1e-05	1e-05	1e-05	0.00253	0.00085	1e-05	0.00632	0
FeO	33.052	33.529	33.543	34.021	33.469	33.369	33.839	33.424	33.391	33.631	33.972	32.451	33.553	32.965	33.625	33.6397	33.7002	32.7989	30.6702	33.5606	32.4311	34.1749	34.5793	34.4718	33.9358	34.2685	32.4421	34.434	32.7007	33.8833	33.7758	34.1678	34.5798	33.8039	21.6874	21.9526	22.3577	21.6218	21.7261	22.2798	22.5883	20.148
MnO	0.988	1.089	1.075	1.134	1.093	1.089	1.098	1.123	1.044	1.117	0.998	1.081	1.121	1.15	1.057	1.03811	1.03588	1.05389	1.01104	1.0304	0.96689	1.05874	1.07603	1.05423	1.02062	1.01331	0.99841	1.08517	0.97014	1.05579	1.03981	1.05927	1.069	1.06033	0.66086	0.65507	0.67424	0.60692	0.64274	0.65703	0.70506	0.603
MgO	10.222	10.392	11.348	10.496	10.664	9.691	10.646	9.508	10.626	10.446	10.55	9.713	9.669	10.543	10.383	10.4928	10.2758	10.5132	13.1403	10.218	9.86099	10.4127	10.4046	10.1991	10.2551	10.2795	9.05438	10.2894	10.199	10.4906	10.4134	10.2029	10.3973	10.4067	8.98407	8.89899	8.85586	9.22518	9.27504	9.18961	8.95053	9.283
CaO	4.723	4.36	3.811	4.153	4.359	4.359	4.256	4.077	4.578	4.35	4.173	5.168	4.51	4.638	4.072	4.55952	4.50444	4.96874	4.09162	5.19066	5.9304	4.26279	4.13846	4.45718	4.35953	4.39326	4.5725	3.81565	4.15752	4.41681	4.2551	4.42382	4.21612	4.46029	16.9125	16.9947	16.5846	16.0164	16.7431	16.3916	16.1487	17.341
Na2O	0.046	0.024	0.032	0.095	0.114	0.077	0.051	0	0.036	0.068	0.009	0.103	0.068	0.116	0.056	0.08026	0.0681	0.08382	0.05537	0.06986	0.08362	0.04312	0.09117	0.08697	0.09347	0.09463	0.15312	0.05617	0.08322	0.05677	0.04025	0.03953	0.05702	0.05696	0.21976	0.26148	0.22104	0.27164	0.21711	0.26066	0.25486	0.267
K2O	0.026	0.004	0.001	0.027	0.005	0	0.012	0.13	0.017	0.027	0.009	0.059	0.032	0.026	0.009	1e-05	1e-05	1e-05	1e-05	1e-05	0.01768	1e-05	1e-05	1e-05	1e-05	1e-05	0.0759	1e-05	0.04182	1e-05	1e-05	1e-05	1e-05	1e-05	1e-05	1e-05	1e-05	0.07368	1e-05	1e-05	1e-05	0.041
NiO	0.056	0	0.013	0	0	0.032	0.001	0	0.068	0	0	0.032	0.026	0.056	0	1e-05	1e-05	1e-05	0.00391	1e-05	1e-05	1e-05	0.03603	0.01845	0.01383	0.01032	0.013	1e-05	1e-05	0.00421	1e-05	1e-05	1e-05	1e-05	1e-05	1e-05	0.01608	0.00726	0.00182	0.00663	0.0147	0
Total	99.26	99.739	100.159	100.174	100.254	98.554	100.23	98.227	100.165	100.452	99.83	99.659	98.804	99.684	99.484	99.8703	98.3234	97.4211	99.184	98.3496	97.3586	99.1644	99.8833	99.1477	98.2662	99.1818	94.561	98.5415	96.0755	98.5764	98.8691	98.7885	99.7998	98.8461	99.4955	99.3354	98.4238	98.6915	98.4944	98.7295	98.9971	99.392
O	6	6	6	6	6	6	6	6	6	6	6	6	6	6	6	6	6	6	6	6	6	6	6	6	6	6	6	6	6	6	6	6	6	6	6	6	6	6	6	6	6	6
Si	1.99674	1.99692	1.99146	1.99152	1.99038	2.00604	1.98672	2.01216	1.9395	1.9881	2.00016	1.9881	2.00982	1.9998	1.98618	1.98	1.9725	1.959	1.9725	1.9545	1.9515	1.9725	1.9755	1.959	1.965	1.971	1.965	1.9785	1.968	1.9665	1.9815	1.971	1.9755	1.974	1.9635	1.956	1.9365	1.9545	1.941	1.9425	1.953	1.9797
Ti	0.00402	0.0069	0.00306	0.006	0.00666	0.00528	0.00516	0.00438	0.01128	0.00606	0.0042	0.00678	0.00744	0.0054	0.00732	0.009	0.006	0.006	0.0075	0.0075	0.0075	0.0075	0.006	0.0105	0.009	0.0075	0.0075	0.006	0.006	0.006	0.0045	0.006	0.006	0.006	0.0105	0.0105	0.015	0.0135	0.012	0.0135	0.012	0.00972
Al	0.0201	0.01446	0.00978	0.01308	0.01788	0.01746	0.01872	0.01998	0.02232	0.01938	0.0168	0.01668	0.02394	0.01782	0.02076	0.0195	0.018	0.018	0.0195	0.021	0.033	0.0165	0.0165	0.018	0.0195	0.018	0.048	0.012	0.0315	0.018	0.018	0.018	0.018	0.018	0.0405	0.039	0.048	0.0585	0.045	0.042	0.042	0.0396
Cr	0	0	0.00204	0	0.0009	0	0.00102	0.00054	0.0012	0	0.00096	0	0.00078	0	0	0	0	0	0	0	0	0	0	0.0015	0	0	0	0	0.0015	0	0	0	0	0	0	0	0	0	0	0	0	0
Fe2	1.113	1.12428	1.11822	1.1385	1.11612	1.13328	1.13076	1.1388	1.2483	1.11504	1.11882	1.14018	1.08504	1.13886	1.10598	1.1295	1.1535	1.134	1.0215	1.152	1.122	1.1595	1.1655	1.1745	1.164	1.164	1.1565	1.1775	1.143	1.158	1.1475	1.1655	1.167	1.1505	0.7155	0.7275	0.7515	0.7185	0.726	0.744	0.753	0.6603
Mn	0.03372	0.03696	0.0363	0.03846	0.0369	0.03744	0.03714	0.03876	0.0435	0.03528	0.03762	0.0339	0.0366	0.03852	0.03906	0.036	0.036	0.0375	0.0345	0.036	0.0345	0.036	0.036	0.036	0.036	0.0345	0.036	0.0375	0.0345	0.036	0.036	0.036	0.036	0.036	0.0225	0.0225	0.0225	0.021	0.0225	0.0225	0.024	0.02004
Mg	0.61356	0.62112	0.67428	0.62604	0.63384	0.58668	0.63408	0.57744	0.54042	0.63246	0.61944	0.63114	0.57888	0.58494	0.63048	0.6285	0.627	0.648	0.78	0.6255	0.609	0.63	0.6255	0.6195	0.627	0.6225	0.576	0.627	0.636	0.639	0.63	0.621	0.6255	0.6315	0.528	0.525	0.5295	0.546	0.5535	0.5475	0.531	0.54222
Ca	0.20376	0.18732	0.16278	0.17808	0.18624	0.18966	0.18222	0.17796	0.22806	0.19584	0.1854	0.17946	0.2214	0.19614	0.19938	0.1965	0.198	0.2205	0.174	0.228	0.2625	0.186	0.1785	0.195	0.192	0.1905	0.2085	0.1665	0.186	0.1935	0.1845	0.1935	0.183	0.195	0.7155	0.7215	0.714	0.681	0.717	0.702	0.6885	0.7281
Na	0.0036	0.00186	0.00246	0.00738	0.00882	0.00606	0.00396	0	0.00324	0.00276	0.00522	0.00072	0.00798	0.00534	0.009	0.006	0.006	0.006	0.0045	0.006	0.006	0.003	0.0075	0.0075	0.0075	0.0075	0.012	0.0045	0.006	0.0045	0.003	0.003	0.0045	0.0045	0.0165	0.0195	0.0165	0.021	0.0165	0.0195	0.0195	0.02028
K	0.00132	0.00018	6e-05	0.00138	0.00024	0	0.0006	0.00678	0.0024	0.00084	0.00138	0.00048	0.003	0.00168	0.00132	0	0	0	0	0	0.0015	0	0	0	0	0	0.0045	0	0.0015	0	0	0	0	0	0	0	0	0.003	0	0	0	0.00204
Ni	0.0018	0	0.00042	0	0	0.00102	6e-05	0	0	0.00216	0	0	0.00102	0.00084	0.0018	0	0	0	0	0	0	0	0.0015	0	0	0	0	0	0	0	0	0	0	0	0	0	0	0	0	0	0	0
Total	3.99162	3.99	4.00086	4.00032	3.99804	3.98298	4.0005	3.97668	4.04028	3.99798	3.99006	3.99738	3.9759	3.9894	4.00134	4.0035	4.0155	4.029	4.0125	4.0305	4.0275	4.0125	4.014	4.023	4.02	4.017	4.0125	4.011	4.014	4.0215	4.0065	4.0155	4.014	4.014	4.0125	4.023	4.0335	4.017	4.0335	4.0335	4.0245	4.00194
Enstatite	31.7854	32.1371	34.4851	32.2266	32.7363	30.7223	32.566	30.4846	32.545	32.2011	32.3532	30.7046	30.4666	32.5688	32.2725	32.1566	31.6907	32.3596	39.4837	31.1892	30.5493	31.8907	31.7593	31.1463	31.6188	31.4871	29.6754	31.8113	32.3664	32.1025	32.1101	31.3636	31.6629	31.9423	26.9525	26.5957	26.5414	28.0648	27.7235	27.4643	26.9202	28.0853
Ferrosilite	57.6588	58.1709	57.1898	58.6064	57.6449	59.3458	58.0753	60.1204	57.3775	58.161	58.4474	57.552	59.3175	57.1318	58.6317	57.7897	58.3017	56.6292	51.7084	57.442	56.2829	58.694	59.1775	59.0498	58.6989	58.8771	59.5827	59.7412	58.1679	58.1763	58.4862	58.8636	59.0737	58.1942	36.5237	36.8541	37.6692	36.9314	36.3636	37.3213	38.1749	34.2014
Wollastonite	10.5558	9.69204	8.32515	9.167	9.61884	9.93182	9.35873	9.395	10.0775	9.63788	9.1994	11.7434	10.2159	10.2994	9.09572	10.0537	10.0076	11.0112	8.8079	11.3687	13.1678	9.41534	9.06321	9.80392	9.6823	9.63581	10.7419	8.44749	9.46565	9.72118	9.40367	9.77273	9.26348	9.86343	36.5237	36.5502	35.7895	35.0039	35.9128	35.2144	34.9049	37.7133
total	100	100	100	100	100	100	100	100	100	100	100	100	100	100	100	100	100	100	100	100	100	100	100	100	100	100	100	100	100	100	100	100	100	100	100	100	100	100	100	100	100	100
Mg#	35.5366	35.5861	37.6167	35.4789	36.2203	34.1101	35.9285	33.6456	30.2127	36.1923	35.6356	35.6311	34.7901	33.9332	36.3084	35.7509	35.2148	36.3636	43.2973	35.1899	35.182	35.2054	34.9246	34.5318	35.0084	34.8447	33.2468	34.7465	35.7504	35.5593	35.443	34.7607	34.8954	35.4377	42.4608	41.9162	41.3349	43.1791	43.2591	42.3926	41.3551	45.0903
Dry Gulch Member
	DG-11.1-004
	pigeonite	pigeonite	pigeonite	pigeonite	pigeonite	pigeonite	pigeonite	pigeonite	pigeonite	pigeonite	pigeonite	pigeonite	pigeonite	pigeonite	pigeonite	pigeonite	pigeonite	pigeonite	pigeonite	pigeonite	augite	augite	augite	augite	augite	augite	augite	augite	augite	augite	augite	augite	augite	augite	augite	augite	augite	augite	augite
	rim	core	core	core	rim	core	core	rim	rim	core	core	core	core	rim	core	core	core	core	rim	core	core	rim	core	core	rim	rim	core	rim	core	rim	core	rim	rim	rim	core	rim	core	rim	core
	cluster	cluster	cluster	cluster	cluster	cluster	single	single	cluster	cluster	cluster	cluster	cluster	cluster	cluster	cluster	cluster	single	cluster	cluster	cluster	cluster	single	single	cluster	cluster	cluster	single	single	cluster	cluster	cluster	cluster	single	cluster	single	single	single	single
SiO2	44.6413	45.1594	46.9936	47.486	47.4012	45.6656	45.0558	46.3387	45.8503	45.8546	46.2297	46.6386	46.962	46.0027	46.133	46.841	46.6243	46.9627	45.7988	45.6499	47.4184	46.802	48.0585	47.59	46.1788	47.0918	46.8761	46.8677	46.431	46.4202	47.1158	47.1357	47.4981	47.6823	47.3851	46.6263	47.1544	47.5975	47.1963
TiO2	0.17982	0.21238	0.24205	0.2612	0.24381	0.24526	0.17988	0.23659	0.16692	0.19751	0.17975	0.20626	0.15572	0.20689	0.2589	0.18464	0.16099	0.2603	0.18405	0.18099	0.24599	0.25216	0.35419	0.25473	0.2477	0.33819	0.30398	0.29077	0.36468	0.2774	0.33431	0.31274	0.29714	0.30143	0.32629	0.30812	0.35127	0.30649	0.28236
Al2O3	0.30337	0.39917	0.32139	0.4076	0.34727	0.32053	0.30494	0.43781	0.30277	0.31112	0.30901	0.31055	0.34268	0.36489	0.34869	0.35894	0.2906	0.34274	0.27599	0.3241	0.58181	0.439	0.67488	0.66646	0.56418	0.80369	0.86412	0.90808	0.73888	0.7078	0.65555	0.75003	0.68709	0.69636	0.73145	0.65532	0.70001	0.68738	0.72083
Cr2O3	1e-05	1e-05	1e-05	0.01406	1e-05	1e-05	1e-05	1e-05	0.00088	0.00503	0.00053	0.0121	0.01663	1e-05	1e-05	0.00753	0.00655	0.00422	1e-05	1e-05	1e-05	1e-05	1e-05	0.00515	1e-05	0.0078	1e-05	0.00715	1e-05	0.01004	0.01105	1e-05	1e-05	0.01652	1e-05	0.00771	0.01527	1e-05	1e-05
FeO	36.0462	35.4769	36.105	34.7069	35.9431	35.5687	35.3579	34.4085	36.2957	36.1911	35.2792	35.7246	35.8615	36.1577	35.6732	35.945	35.9717	35.4198	35.7725	35.7424	27.5898	31.325	22.711	22.9837	27.3209	22.6436	21.9081	22.6422	22.7288	22.5684	22.7094	22.9605	22.6139	23.6544	22.8317	22.8849	23.4447	22.9315	22.8999
MnO	1.16143	1.08245	1.1259	1.13556	1.14772	1.15459	1.13923	1.08822	1.12746	1.13163	1.13177	1.14529	1.17324	1.1626	1.14317	1.14174	1.14837	1.08138	1.17171	1.17581	0.82613	1.01756	0.71881	0.7181	0.89466	0.69934	0.67522	0.67406	0.69329	0.71195	0.67648	0.70284	0.70888	0.73164	0.72582	0.70395	0.73393	0.70632	0.70741
MgO	9.02434	8.83389	8.86986	8.86531	9.00304	8.87527	8.89212	8.67947	8.97963	8.99803	8.94133	8.91837	9.05532	8.95948	9.0501	9.10733	8.97365	8.82504	8.87683	9.01876	8.25776	8.59759	7.81134	7.85553	8.24023	8.24131	8.32957	7.74683	7.86444	7.93157	7.88406	7.92664	7.84966	7.86958	7.70009	7.86678	7.70599	7.74434	7.99018
CaO	4.32239	5.0904	4.43056	5.57163	4.80915	4.53707	4.29565	4.42852	4.29564	4.34459	4.26148	4.3175	4.3969	4.46845	4.32529	4.4498	4.3011	4.87639	4.25581	4.28029	12.7824	9.1086	17.7172	17.3598	12.7761	17.4083	17.3357	17.1803	17.389	17.6682	17.6163	17.4128	17.4508	16.6956	17.671	17.394	17.4964	17.4195	17.3155
Na2O	0.0614	0.06908	0.04773	0.07457	0.05033	0.08062	0.07672	0.06957	0.05347	0.06941	0.07004	0.05679	0.06857	0.0512	0.0646	0.07176	0.05136	0.07814	0.07063	0.06032	0.21603	0.15016	0.21772	0.22936	0.16276	0.22742	0.21833	0.22986	0.21554	0.266	0.21416	0.22492	0.2308	0.21688	0.23798	0.24699	0.20231	0.20343	0.21716
K2O	1e-05	1e-05	1e-05	1e-05	1e-05	1e-05	0.00186	0.00265	1e-05	1e-05	1e-05	1e-05	1e-05	1e-05	1e-05	1e-05	1e-05	1e-05	1e-05	1e-05	1e-05	1e-05	1e-05	1e-05	1e-05	1e-05	1e-05	0.07479	1e-05	1e-05	1e-05	1e-05	1e-05	1e-05	1e-05	1e-05	1e-05	1e-05	1e-05
NiO	0.00038	1e-05	1e-05	0.02643	0.00719	0.01709	0.0084	0.01264	0.007	1e-05	0.02715	0.00629	0.0007	0.00356	1e-05	1e-05	1e-05	0.02025	1e-05	0.00347	1e-05	0.00313	0.00178	0.01564	0.00594	1e-05	0.00533	1e-05	0.0008	0.00829	1e-05	1e-05	0.00233	1e-05	1e-05	1e-05	1e-05	0.01777	1e-05
Total	95.7407	96.3238	98.1361	98.5494	98.9528	96.4648	95.3125	95.7026	97.0797	97.103	96.43	97.3364	98.0333	97.3774	96.997	98.1077	97.5286	97.8709	96.4063	96.436	97.9183	97.6952	98.2654	97.6786	96.3913	97.4614	96.5164	96.6218	96.4263	96.5699	97.2172	97.4262	97.3388	97.8647	97.6094	96.6941	97.8044	97.6142	97.3297
O	6	6	6	6	6	6	6	6	6	6	6	6	6	6	6	6	6	6	6	6	6	6	6	6	6	6	6	6	6	6	6	6	6	6	6	6	6	6	6
Si	1.9215	1.9275	1.9575	1.9605	1.956	1.941	1.9395	1.968	1.9395	1.938	1.9575	1.9575	1.956	1.938	1.9455	1.9515	1.9545	1.9575	1.947	1.941	1.9455	1.9425	1.944	1.941	1.9305	1.9245	1.929	1.932	1.923	1.92	1.932	1.929	1.941	1.9425	1.935	1.926	1.9275	1.9425	1.932
Ti	0.006	0.0075	0.0075	0.0075	0.0075	0.0075	0.006	0.0075	0.006	0.006	0.006	0.006	0.0045	0.006	0.0075	0.006	0.0045	0.0075	0.006	0.006	0.0075	0.0075	0.0105	0.0075	0.0075	0.0105	0.009	0.009	0.012	0.009	0.0105	0.009	0.009	0.009	0.0105	0.009	0.0105	0.009	0.009
Al	0.015	0.0195	0.0165	0.0195	0.0165	0.0165	0.015	0.0225	0.015	0.015	0.015	0.015	0.0165	0.018	0.018	0.018	0.015	0.0165	0.0135	0.0165	0.0285	0.021	0.0315	0.0315	0.0285	0.039	0.042	0.0435	0.036	0.0345	0.0315	0.036	0.033	0.033	0.0345	0.0315	0.033	0.033	0.0345
Cr	0	0	0	0	0	0	0	0	0	0	0	0	0	0	0	0	0	0	0	0	0	0	0	0	0	0	0	0	0	0	0	0	0	0	0	0	0	0	0
Fe2	1.2975	1.266	1.257	1.1985	1.2405	1.2645	1.2735	1.2225	1.284	1.2795	1.2495	1.254	1.2495	1.275	1.2585	1.2525	1.2615	1.2345	1.272	1.2705	0.9465	1.0875	0.768	0.7845	0.9555	0.774	0.7545	0.78	0.7875	0.7815	0.7785	0.786	0.7725	0.8055	0.78	0.7905	0.801	0.783	0.7845
Mn	0.042	0.039	0.039	0.039	0.0405	0.042	0.042	0.039	0.0405	0.0405	0.0405	0.0405	0.042	0.042	0.0405	0.0405	0.0405	0.0375	0.042	0.042	0.0285	0.036	0.024	0.0255	0.0315	0.024	0.024	0.024	0.024	0.0255	0.024	0.024	0.024	0.0255	0.0255	0.024	0.0255	0.024	0.024
Mg	0.579	0.5625	0.5505	0.546	0.5535	0.5625	0.57	0.549	0.567	0.567	0.564	0.558	0.5625	0.5625	0.5685	0.5655	0.561	0.549	0.5625	0.5715	0.5055	0.5325	0.471	0.477	0.513	0.5025	0.5115	0.4755	0.486	0.489	0.4815	0.4845	0.4785	0.4785	0.4695	0.4845	0.4695	0.471	0.4875
Ca	0.1995	0.2325	0.198	0.246	0.213	0.207	0.198	0.201	0.195	0.1965	0.1935	0.1935	0.1965	0.2025	0.195	0.198	0.1935	0.2175	0.1935	0.195	0.5625	0.405	0.768	0.759	0.573	0.762	0.7635	0.759	0.771	0.783	0.774	0.7635	0.7635	0.729	0.774	0.7695	0.7665	0.762	0.759
Na	0.0045	0.006	0.0045	0.006	0.0045	0.006	0.006	0.006	0.0045	0.006	0.006	0.0045	0.006	0.0045	0.006	0.006	0.0045	0.006	0.006	0.0045	0.0165	0.012	0.0165	0.018	0.0135	0.018	0.018	0.018	0.018	0.021	0.0165	0.018	0.018	0.0165	0.0195	0.0195	0.0165	0.0165	0.0165
K	0	0	0	0	0	0	0	0	0	0	0	0	0	0	0	0	0	0	0	0	0	0	0	0	0	0	0	0.0045	0	0	0	0	0	0	0	0	0	0	0
Ni	0	0	0	0.0015	0	0	0	0	0	0	0.0015	0	0	0	0	0	0	0	0	0	0	0	0	0	0	0	0	0	0	0	0	0	0	0	0	0	0	0	0
Total	4.0665	4.059	4.029	4.0245	4.0305	4.047	4.05	4.017	4.05	4.05	4.032	4.0305	4.0335	4.0485	4.0395	4.0365	4.035	4.029	4.0425	4.047	4.041	4.044	4.0365	4.044	4.053	4.0545	4.05	4.047	4.056	4.0635	4.05	4.0515	4.0425	4.0395	4.047	4.0575	4.0515	4.041	4.05
Enstatite	9.60983	11.2809	9.87285	12.3587	10.6129	10.177	9.69875	10.1901	9.53079	9.61821	9.64126	9.64847	9.78342	9.92647	9.64392	9.82143	9.59821	10.8696	9.54142	9.5729	27.9226	20	38.2661	37.565	28.0676	37.3804	37.6201	37.6768	37.7109	38.13	38.0531	37.5369	37.9002	36.2146	38.2506	37.6376	37.6289	37.7976	37.3708
Ferrosilite	27.8902	27.2926	27.4495	27.4303	27.5785	27.6549	27.9206	27.8327	27.7126	27.7533	28.1016	27.8235	28.006	27.5735	28.1157	28.0506	27.8274	27.4363	27.7367	28.056	25.0931	26.2963	23.4679	23.608	25.1286	24.6505	25.2033	23.6039	23.7711	23.813	23.6726	23.8201	23.7528	23.7705	23.2024	23.6977	23.0486	23.3631	24.003
Wollastonite	62.5	61.4265	62.6776	60.211	61.8087	62.1681	62.3806	61.9772	62.7566	62.6285	62.2571	62.528	62.2106	62.5	62.2404	62.128	62.5744	61.6942	62.7219	62.3711	46.9844	53.7037	38.2661	38.827	46.8038	37.9691	37.1766	38.7193	38.518	38.057	38.2743	38.6431	38.347	40.0149	38.5471	38.6647	39.3225	38.8393	38.6263
total	100	100	100	100	100	100	100	100	100	100	100	100	100	100	100	100	100	100	100	100	100	100	100	100	100	100	100	100	100	100	100	100	100	100	100	100	100	100	100
Mg#	30.8553	30.7629	30.4564	31.2984	30.8528	30.7882	30.9194	30.9907	30.6321	30.7067	31.1001	30.7947	31.043	30.6122	31.1166	31.1056	30.7819	30.7822	30.6623	31.0261	34.814	32.8704	38.0145	37.8121	34.9336	39.3655	40.4028	37.8734	38.1625	38.4888	38.2143	38.1346	38.2494	37.2664	37.575	38	36.954	37.5598	38.3255
Little Creek Member
	RC-11.1-004
	pigeonite	pigeonite	pigeonite	pigeonite	pigeonite	pigeonite	pigeonite	pigeonite	pigeonite	pigeonite	pigeonite	pigeonite	pigeonite	pigeonite	pigeonite	pigeonite	pigeonite	pigeonite	pigeonite	pigeonite	pigeonite	pigeonite	pigeonite	pigeonite	pigeonite	pigeonite	pigeonite	augite	augite	augite	augite	augite	augite	augite	augite	augite	augite	augite	augite	augite	augite	augite	augite	augite	augite	augite	augite	augite
	core	core	rim	rim	core	core	rim	core	rim	rim	core	core	rim	rim	core	core	core	core	core	rim	core	rim	core	core	rim	core	rim	core	rim	rim	core	core	rim	core	core	rim	core	rim	core	rim	mid	core	rim	core	rim	core	core	core
	cluster	single	single	single	single	single	single	cluster	cluster	single	single	cluster	cluster	single	single	single	single	single	single	single	single	single	single	cluster	cluster	single	single	single	single	single	single	cluster	cluster	single	single	single	single	single	single	cluster	cluster	cluster	single	single	single	single	single	single
SiO2	50.899	50.1315	51.0342	49.6187	50.1302	48.3586	47.9889	49.6773	48.6274	47.6111	47.3901	47.4212	47.8151	47.4572	46.7733	49.2505	48.7779	48.6806	47.6015	47.6474	49.556	48.9211	47.4719	47.347	47.5869	46.7901	47.1132	49.8285	50.1692	50.13	48.902	49.6802	48.6388	50.1247	48.0532	49.6082	48.8065	48.5922	48.2104	48.7195	49.0725	48.219	48.8547	47.931	49.3744	49.2426	48.0418	49.0842
TiO2	0.16656	0.21395	0.17124	0.18957	0.19314	0.17975	0.14366	0.21374	0.21804	0.17034	0.25428	0.21762	0.18742	0.23713	0.24596	0.1901	0.17332	0.26788	0.2944	0.25886	0.18862	0.18788	0.20695	0.15781	0.17075	0.16233	0.25215	0.35001	0.40014	0.40556	0.36267	0.33086	0.36359	0.37284	0.39059	0.381	0.42789	0.38951	0.41331	0.3547	0.35959	0.33152	0.34978	0.34708	0.39997	0.38787	0.3437	0.3076
Al2O3	0.40207	0.42275	0.3986	0.45319	0.4269	0.41907	0.3864	0.41763	0.41236	0.42696	0.38027	0.43339	0.40554	0.40802	0.40776	0.42686	0.41416	0.43059	0.42051	0.41892	0.38327	0.39443	0.4099	0.42864	0.39208	0.38425	0.39985	0.91178	0.93951	1.03748	0.86281	0.9021	0.93649	0.99695	1.01128	0.90418	0.94826	0.95087	0.84148	0.92931	0.9745	0.99738	0.95179	0.90407	0.97093	1.00453	0.97594	0.92207
Cr2O3	0.00082	0.01115	1e-05	1e-05	0.00579	1e-05	1e-05	0.00268	1e-05	1e-05	1e-05	0.02219	0.00832	0.00896	0.02064	0.01452	1e-05	1e-05	0.01019	1e-05	1e-05	0.00893	1e-05	0.00055	0.02896	0.00023	0.00953	0.00356	1e-05	0.01524	0.01058	0.015	0.00591	1e-05	1e-05	1e-05	0.00894	0.00261	1e-05	0.00258	0.01157	0.00526	1e-05	0.01222	1e-05	0.00162	1e-05	0.0006
FeO	29.9493	30.4154	30.0365	30.1887	30.2163	30.5473	30.3595	30.4215	30.6812	30.4266	30.3904	29.4199	30.0491	29.9921	30.286	30.0745	29.8885	30.4517	30.3648	30.012	30.243	30.2648	30.1232	30.4521	30.0136	30.0228	30.4615	18.0419	17.6455	17.9487	17.8679	17.8367	17.7218	17.5609	17.6362	18.1057	17.7897	17.7514	17.6536	17.7206	17.786	17.8865	17.987	17.843	17.6752	18.0712	18.0097	17.8877
MnO	0.91112	0.91834	0.92652	0.90892	0.90185	0.88857	0.90907	0.9273	0.8972	0.87558	0.89466	0.87445	0.92352	0.88064	0.89569	0.90222	0.88367	0.92667	0.95259	0.93129	0.91892	0.9103	0.89685	0.92862	0.86266	0.89726	0.8892	0.5487	0.54004	0.52358	0.52684	0.51881	0.53671	0.51775	0.48234	0.55544	0.52972	0.52307	0.51128	0.54626	0.52133	0.52933	0.5132	0.5215	0.52967	0.53693	0.52813	0.53548
MgO	13.59	13.5579	13.677	13.5249	13.6846	13.6849	13.4032	13.793	13.7383	13.6742	13.6879	15.4679	13.6329	13.3429	13.5375	13.6133	13.7125	13.3519	13.4937	13.5396	13.8332	13.5404	13.2138	13.5489	14.215	13.5059	13.4868	11.2009	11.0996	10.8119	10.2394	11.0676	10.9903	11.1076	11.2191	11.1173	11.1456	10.9022	10.5184	10.9596	10.9583	10.9171	11.1156	10.0173	11.2323	11.0463	10.9674	10.9998
CaO	3.99093	3.83804	4.04793	3.81343	3.89026	3.8427	3.92576	3.67542	3.88334	4.13287	3.86751	3.91121	3.9616	3.82586	3.9224	3.98156	3.85002	4.08584	3.96891	3.95297	3.83147	3.88471	3.89224	3.83936	3.88302	3.91759	3.96025	17.6702	18.0072	17.7945	17.8702	17.9343	18.1589	18.1447	18.0279	17.7338	18.0262	17.8069	18.109	18.0521	17.7913	17.7681	17.7901	17.7672	17.8909	17.9743	17.598	18.1061
Na2O	0.06549	0.07474	0.07474	0.06677	0.03863	0.08286	0.05975	0.06361	0.08718	0.05533	0.05598	0.16569	0.06426	0.07726	0.07175	0.05145	0.05169	0.05938	0.06811	0.03785	0.07231	0.06576	0.07813	0.08086	0.07389	0.08056	0.0384	0.26287	0.26684	0.29388	0.30289	0.28316	0.2519	0.25061	0.2677	0.2467	0.24831	0.22709	0.26258	0.28329	0.29917	0.24884	0.28724	0.31225	0.26542	0.24874	0.2817	0.26382
K2O	1e-05	1e-05	1e-05	1e-05	1e-05	1e-05	1e-05	1e-05	1e-05	1e-05	1e-05	1e-05	1e-05	1e-05	1e-05	1e-05	1e-05	1e-05	1e-05	1e-05	1e-05	1e-05	0.00142	1e-05	1e-05	1e-05	1e-05	1e-05	1e-05	0.01641	0.01216	1e-05	1e-05	0.00513	1e-05	1e-05	1e-05	0.01609	0.0165	1e-05	1e-05	1e-05	1e-05	0.01682	1e-05	1e-05	1e-05	1e-05
NiO	1e-05	1e-05	1e-05	0.02288	1e-05	1e-05	0.00732	0.00942	0.0128	0.00272	0.00102	0.01081	0.00145	0.02349	1e-05	1e-05	0.0062	0.01353	0.01875	1e-05	1e-05	0.03899	1e-05	1e-05	1e-05	1e-05	1e-05	0.00196	0.00065	0.01505	0.00547	0.00181	0.02209	0.00322	0.01584	1e-05	1e-05	0.02715	1e-05	0.01184	0.01316	1e-05	0.01625	0.00581	1e-05	0.00918	0.00863	0.01172
Total	99.9753	99.5837	100.367	98.7871	99.4877	98.0038	97.1836	99.2016	98.5579	97.3757	96.9222	97.9443	97.0493	96.2536	96.161	98.505	97.758	98.2682	97.1935	96.799	99.0268	98.2174	96.2944	96.7838	97.2268	95.7611	96.611	98.8204	99.0687	98.9923	96.9629	98.5706	97.6266	99.0845	97.1042	98.6524	97.9311	97.1892	96.5366	97.5798	97.7874	96.9031	97.8657	95.6784	98.3388	98.5232	96.7551	98.119
O	6	6	6	6	6	6	6	6	6	6	6	6	6	6	6	6	6	6	6	6	6	6	6	6	6	6	6	6	6	6	6	6	6	6	6	6	6	6	6	6	6	6	6	6	6	6	6	6
Si	1.9935	1.98	1.992	1.9755	1.98	1.9515	1.9545	1.971	1.9515	1.9395	1.9395	1.9125	1.9485	1.9515	1.9335	1.9695	1.965	1.959	1.9425	1.9485	1.9695	1.965	1.953	1.941	1.9365	1.9395	1.9365	1.9515	1.956	1.9575	1.956	1.95	1.935	1.953	1.923	1.9485	1.9335	1.9395	1.941	1.938	1.944	1.9335	1.9365	1.9485	1.9425	1.9395	1.9305	1.941
Ti	0.0045	0.006	0.0045	0.006	0.006	0.006	0.0045	0.006	0.006	0.0045	0.0075	0.006	0.006	0.0075	0.0075	0.006	0.006	0.0075	0.009	0.0075	0.006	0.006	0.006	0.0045	0.0045	0.0045	0.0075	0.0105	0.012	0.012	0.0105	0.0105	0.0105	0.0105	0.012	0.0105	0.012	0.012	0.012	0.0105	0.0105	0.0105	0.0105	0.0105	0.012	0.012	0.0105	0.009
Al	0.018	0.0195	0.018	0.021	0.0195	0.0195	0.018	0.0195	0.0195	0.021	0.018	0.021	0.0195	0.0195	0.0195	0.0195	0.0195	0.021	0.0195	0.0195	0.018	0.018	0.0195	0.021	0.0195	0.0195	0.0195	0.042	0.0435	0.048	0.0405	0.042	0.0435	0.0465	0.048	0.042	0.045	0.045	0.0405	0.0435	0.045	0.0465	0.045	0.0435	0.045	0.0465	0.0465	0.0435
Cr	0	0	0	0	0	0	0	0	0	0	0	0	0	0	0	0	0	0	0	0	0	0	0	0	0.0015	0	0	0	0	0	0	0	0	0	0	0	0	0	0	0	0	0	0	0	0	0	0	0
Fe2	0.981	1.005	0.981	1.005	0.9975	1.032	1.035	1.0095	1.0305	1.0365	1.0395	0.993	1.0245	1.032	1.047	1.005	1.0065	1.0245	1.0365	1.026	1.005	1.017	1.0365	1.044	1.0215	1.041	1.047	0.591	0.576	0.5865	0.597	0.585	0.5895	0.573	0.5895	0.594	0.5895	0.5925	0.594	0.5895	0.5895	0.6	0.597	0.606	0.582	0.5955	0.6045	0.591
Mn	0.03	0.03	0.03	0.03	0.03	0.03	0.0315	0.0315	0.03	0.03	0.0315	0.03	0.0315	0.03	0.0315	0.03	0.03	0.0315	0.033	0.0315	0.0315	0.0315	0.0315	0.033	0.03	0.0315	0.0315	0.018	0.018	0.018	0.018	0.018	0.018	0.0165	0.0165	0.018	0.018	0.018	0.018	0.018	0.018	0.018	0.0165	0.018	0.018	0.018	0.018	0.018
Mg	0.7935	0.798	0.7965	0.8025	0.8055	0.8235	0.8145	0.816	0.822	0.831	0.8355	0.93	0.828	0.8175	0.834	0.8115	0.8235	0.801	0.8205	0.825	0.819	0.8115	0.81	0.828	0.8625	0.834	0.8265	0.654	0.645	0.63	0.6105	0.648	0.651	0.645	0.669	0.651	0.6585	0.648	0.6315	0.6495	0.6465	0.6525	0.657	0.6075	0.6585	0.648	0.657	0.648
Ca	0.168	0.162	0.1695	0.162	0.165	0.1665	0.171	0.156	0.1665	0.18	0.1695	0.1695	0.1725	0.168	0.174	0.171	0.1665	0.1755	0.174	0.1725	0.1635	0.1665	0.171	0.168	0.1695	0.174	0.174	0.741	0.7515	0.744	0.7665	0.7545	0.774	0.7575	0.7725	0.7455	0.765	0.762	0.7815	0.7695	0.7545	0.7635	0.756	0.774	0.7545	0.759	0.7575	0.7665
Na	0.0045	0.006	0.006	0.0045	0.003	0.006	0.0045	0.0045	0.0075	0.0045	0.0045	0.0135	0.0045	0.006	0.006	0.0045	0.0045	0.0045	0.006	0.003	0.006	0.0045	0.006	0.006	0.006	0.006	0.003	0.0195	0.0195	0.0225	0.024	0.021	0.0195	0.0195	0.021	0.0195	0.0195	0.018	0.021	0.0225	0.0225	0.0195	0.0225	0.024	0.021	0.0195	0.0225	0.0195
K	0	0	0	0	0	0	0	0	0	0	0	0	0	0	0	0	0	0	0	0	0	0	0	0	0	0	0	0	0	0.0015	0	0	0	0	0	0	0	0.0015	0.0015	0	0	0	0	0.0015	0	0	0	0
Ni	0	0	0	0	0	0	0	0	0	0	0	0	0	0.0015	0	0	0	0	0	0	0	0.0015	0	0	0	0	0	0	0	0	0	0	0	0	0	0	0	0.0015	0	0	0	0	0	0	0	0	0	0
Total	3.9945	4.0065	3.9975	4.011	4.0065	4.035	4.0335	4.0155	4.035	4.047	4.0455	4.0755	4.038	4.035	4.0515	4.017	4.0215	4.026	4.041	4.035	4.0185	4.0215	4.035	4.047	4.0515	4.05	4.047	4.0275	4.0215	4.0185	4.0245	4.029	4.0425	4.0215	4.0515	4.029	4.041	4.035	4.038	4.041	4.0335	4.0425	4.041	4.032	4.0335	4.0365	4.047	4.038
Enstatite	40.6107	40.9091	40.7464	40.9299	40.727	40.3118	41.1809	40.7132	40.5861	40.8657	40.8657	42.0101	40.5204	40.5839	43.0435	41.2472	40.03	40.3988	40.7709	41.2075	42.8962	36.8667	40.5882	40.6994	40.7028	40.3663	42.4088	32.9305	32.6996	32.1347	30.9271	32.6038	32.3157	32.65	32.9394	32.7054	32.7124	32.3596	31.4649	32.3376	32.4793	32.3661	32.6866	30.566	33.0075	32.3596	32.5409	32.3111
Ferrosilite	51.145	50.3852	51.0282	50.686	51.0386	51.2249	50.9463	51.0401	50.6227	50.8437	50.8437	49.6023	51.1524	50.9489	48.6087	50.4132	51.1994	51.034	50.7042	50.566	48.7022	54.014	51.1765	50.8929	50.8053	51.1355	49.2701	29.7583	29.2015	29.9158	30.2432	29.434	29.2628	29.0053	29.0251	29.8417	29.2846	29.588	29.5964	29.3503	29.6157	29.7619	29.7015	30.4906	29.1729	29.7378	29.9406	29.469
Wollastonite	8.24427	8.7057	8.22544	8.38415	8.23442	8.46325	7.87282	8.24666	8.79121	8.29054	8.29054	8.38756	8.32714	8.46715	8.34783	8.33959	8.77061	8.56721	8.52483	8.22642	8.40164	9.11925	8.23529	8.40774	8.49195	8.49817	8.32117	37.3112	38.0989	37.9495	38.8298	37.9623	38.4214	38.3447	38.0355	37.4529	38.003	38.0524	38.9387	38.3122	37.905	37.872	37.6119	38.9434	37.8195	37.9026	37.5186	38.2199
total	100	100	100	100	100	100	100	100	100	100	100	100	100	100	100	100	100	100	100	100	100	100	100	100	100	100	100	100	100	100	100	100	100	100	100	100	100	100	100	100	100	100	100	100	100	100	100	100
Mg#	44.7168	44.2596	44.8101	44.3983	44.6755	44.3816	44.0389	44.7001	44.3725	44.498	44.56	48.3619	44.6964	44.2011	44.3381	44.6738	45	43.8784	44.1842	44.5705	44.9013	44.3806	43.8668	44.2308	45.7803	44.48	44.1153	52.5301	52.8256	51.7879	50.559	52.5547	52.4788	52.9557	53.1585	52.2892	52.7644	52.237	51.53	52.4213	52.3058	52.0958	52.3923	50.0618	53.0834	52.111	52.0809	52.3002
Wooden Shoe Member
	RC-10.1-002
	pigeonite	pigeonite	pigeonite	pigeonite	pigeonite	pigeonite	pigeonite	pigeonite	pigeonite	pigeonite	pigeonite	pigeonite	pigeonite	pigeonite	pigeonite	pigeonite	pigeonite	pigeonite	pigeonite	pigeonite	pigeonite	pigeonite	pigeonite	pigeonite	pigeonite	pigeonite	pigeonite	pigeonite	pigeonite	pigeonite	pigeonite	pigeonite	pigeonite	augite	augite	augite	augite	augite	augite	augite	augite	augite	augite	augite	augite	augite	augite	augite	augite
	core	rim	core	rim	core	core	rim	rim	rim	core	rim	core	rim	core	core	rim	core	rim	rim	core	rim	core	rim	rim	core	rim	core	rim	core	rim	core	rim	core	rim	core	core	rim	core	core	rim	core	core	rim	core	rim	core	rim	rim	core
	single	single	cluster	cluster	cluster	single	single	cluster	cluster	cluster	cluster	cluster	single	single	single	single	cluster	cluster	cluster	cluster	single	single	single	single	single	single	single	cluster	cluster	cluster	cluster	cluster	single	single	single	single	single	single	single	cluster	cluster	single	single	single	single	single	single	single	cluster
SiO2	48.366	48.3137	48.3153	49.3953	49.1524	48.3944	48.7923	48.7739	48.9864	48.5728	48.545	48.7812	49.1338	48.9121	49.5592	48.7778	48.9213	49.009	49.1754	47.2585	46.8292	47.0219	46.3559	46.2149	45.9278	46.199	46.2927	45.5038	45.2042	46.7889	46.8838	46.5596	46.6087	47.6662	47.279	47.379	47.0494	47.869	47.4327	47.1932	47.9659	49.2801	48.7252	48.9976	49.3915	50.0139	49.6185	48.3814	50.3779
TiO2	0.19465	0.11809	0.16924	0.26732	0.24262	0.19721	0.15851	0.25833	0.24782	0.22965	0.29815	0.28136	0.20672	0.24469	0.21758	0.22289	0.20863	0.21853	0.26803	0.24296	0.18075	0.24089	0.19878	0.23445	0.24074	0.20479	0.20392	0.21714	0.22081	0.26046	0.22103	0.20699	0.21608	0.3507	0.38955	0.36966	0.40422	0.34934	0.39184	0.38579	0.39864	0.32757	0.40228	0.41674	0.47609	0.36244	0.33329	0.26343	0.28934
Al2O3	0.35135	0.42198	0.47238	0.37553	0.3241	0.29638	0.31398	0.46327	0.41068	0.41894	0.41489	0.40511	0.38427	0.95133	0.4183	0.63924	0.41329	0.39157	0.43683	0.44721	0.41782	0.41262	0.43968	0.39336	0.41053	0.42695	0.53548	0.39936	0.39994	0.4597	0.4115	0.44466	0.40472	0.99221	0.83633	0.85575	0.76503	0.82514	0.83081	0.78369	0.82215	0.91801	1.18266	1.03835	1.17883	0.85067	0.96867	0.86449	0.80181
Cr2O3	1e-05	0.02731	0.00233	1e-05	1e-05	1e-05	1e-05	0.00205	1e-05	1e-05	1e-05	0.01222	1e-05	1e-05	1e-05	1e-05	0.02354	1e-05	0.00486	1e-05	1e-05	0.00662	0.00047	0.01429	1e-05	0.00483	1e-05	1e-05	0.00839	1e-05	1e-05	1e-05	1e-05	0.02085	1e-05	1e-05	0.00669	1e-05	1e-05	0.00719	1e-05	1e-05	0.00777	1e-05	0.01102	1e-05	1e-05	0.00545	0.01733
FeO	36.132	35.8804	34.934	35.5742	35.7725	35.9834	36.111	33.9164	33.9789	33.9361	33.9162	33.8123	34.0234	32.2449	33.7551	33.0725	33.8936	33.3453	34.2198	32.5058	33.9854	34.2462	33.8059	33.9979	33.8134	34.1081	32.4996	33.8174	34.0578	33.0626	33.7219	33.7739	34.0572	21.7032	21.8148	21.8609	21.9403	22.9922	21.8231	21.6248	21.3135	22.8962	22.4599	22.3575	22.2297	22.0862	22.6332	21.081	21.4931
MnO	1.00969	1.02118	0.97182	1.00042	1.03966	1.03574	1.02815	0.95126	0.95921	0.96941	0.94478	0.95343	0.96429	0.93295	0.96139	0.95804	0.99036	0.97865	0.94973	0.96186	0.98376	0.98661	0.964	0.9753	0.9806	0.97092	0.90826	0.98166	0.98202	0.96449	0.96305	0.98862	0.96964	0.59416	0.59621	0.58471	0.60096	0.64841	0.6034	0.6149	0.60405	0.63604	0.62453	0.6288	0.5884	0.59914	0.64339	0.58112	0.59963
MgO	9.41381	9.30761	9.33267	9.31493	9.65541	9.38866	9.47235	10.6338	10.6787	10.7137	10.7184	10.5798	10.657	9.76642	10.7033	10.5436	10.6092	10.6706	10.6022	10.085	10.5397	10.4582	10.6071	10.4188	10.4213	10.5477	10.2196	10.4584	10.4734	10.3851	10.4094	10.4275	10.463	8.83841	8.88323	8.91957	8.89883	9.03376	8.92977	9.00255	8.94623	9.23604	8.51578	8.61865	8.51624	8.75685	8.98628	9.00165	9.16704
CaO	4.25588	4.18275	5.14115	4.75575	4.21565	4.04594	4.04325	4.48721	4.50397	4.40016	4.46185	4.58337	4.51547	4.14881	4.55285	4.51948	4.37618	4.46838	4.72737	4.64246	4.6064	4.58958	4.50029	4.6109	4.56456	4.49094	5.83775	4.46799	4.43766	5.40454	4.62713	4.60992	4.55405	17.1792	17.4396	17.3847	17.1632	16.2441	17.1669	17.2779	17.7193	15.4165	17.3869	17.1526	17.2499	17.34	16.6117	17.0282	17.2743
Na2O	0.04639	0.07287	0.08001	0.07819	0.0604	0.0491	0.05217	0.06219	0.04207	0.09444	0.04848	0.05	0.06871	0.14624	0.05101	0.13306	0.07639	0.05079	0.05531	0.09903	0.08627	0.05596	0.08236	0.06983	0.05451	0.06254	0.07433	0.05358	0.0761	0.07872	0.06814	0.07796	0.06222	0.19595	0.25928	0.23706	0.22765	0.19444	0.22466	0.21753	0.24093	0.21637	0.27733	0.24344	0.23382	0.24007	0.23327	0.31669	0.23247
K2O	1e-05	1e-05	1e-05	1e-05	1e-05	1e-05	1e-05	1e-05	1e-05	1e-05	1e-05	1e-05	1e-05	0.17362	1e-05	0.00118	1e-05	1e-05	1e-05	1e-05	1e-05	1e-05	1e-05	1e-05	1e-05	1e-05	1e-05	1e-05	1e-05	1e-05	1e-05	1e-05	1e-05	1e-05	1e-05	1e-05	1e-05	1e-05	1e-05	1e-05	1e-05	1e-05	1e-05	1e-05	1e-05	1e-05	1e-05	0.01055	1e-05
NiO	1e-05	0.0127	0.03392	0.0057	1e-05	1e-05	0.00124	1e-05	0.00484	1e-05	0.00577	0.01247	1e-05	0.03089	0.01216	1e-05	0.01271	1e-05	0.00228	1e-05	0.00409	1e-05	0.0143	1e-05	0.02184	0.01394	0.00096	1e-05	1e-05	1e-05	1e-05	0.00847	1e-05	0.01486	0.00532	0.00649	0.01411	0.01334	1e-05	0.00058	0.00118	0.01126	0.01588	1e-05	0.00716	1e-05	0.02927	0.0031	1e-05
Total	99.7697	99.3586	99.4528	100.767	100.463	99.3909	99.973	99.5485	99.8127	99.3353	99.3536	99.4712	99.9537	97.5519	100.231	98.8678	99.5253	99.1328	100.442	96.2428	97.6334	98.0186	96.9688	96.9297	96.4353	97.0297	96.5726	95.8993	95.8603	97.4045	97.306	97.0976	97.3357	97.5558	97.5032	97.5979	97.0704	98.1697	97.4031	97.1081	98.0119	98.9382	99.5982	99.4537	99.8826	100.249	100.058	97.5371	100.253
O	6	6	6	6	6	6	6	6	6	6	6	6	6	6	6	6	6	6	6	6	6	6	6	6	6	6	6	6	6	6	6	6	6	6	6	6	6	6	6	6	6	6	6	6	6	6	6	6	6
Si	1.9695	1.974	1.968	1.9815	1.9785	1.9755	1.9785	1.968	1.971	1.9665	1.965	1.971	1.974	1.998	1.9815	1.9755	1.974	1.98	1.968	1.9725	1.9425	1.944	1.9365	1.935	1.9335	1.932	1.938	1.929	1.92	1.941	1.9485	1.9425	1.941	1.932	1.923	1.9245	1.923	1.9335	1.9275	1.9245	1.9335	1.9605	1.935	1.9455	1.9485	1.962	1.9545	1.9515	1.9695
Ti	0.006	0.003	0.0045	0.0075	0.0075	0.006	0.0045	0.0075	0.0075	0.0075	0.009	0.009	0.006	0.0075	0.006	0.0075	0.006	0.006	0.0075	0.0075	0.006	0.0075	0.006	0.0075	0.0075	0.006	0.006	0.0075	0.0075	0.0075	0.0075	0.006	0.0075	0.0105	0.012	0.012	0.012	0.0105	0.012	0.012	0.012	0.0105	0.012	0.012	0.0135	0.0105	0.0105	0.0075	0.009
Al	0.0165	0.021	0.0225	0.018	0.015	0.015	0.015	0.0225	0.0195	0.0195	0.0195	0.0195	0.018	0.0465	0.0195	0.03	0.0195	0.018	0.021	0.0225	0.021	0.0195	0.021	0.0195	0.021	0.021	0.027	0.0195	0.0195	0.0225	0.0195	0.0225	0.0195	0.048	0.0405	0.0405	0.0375	0.039	0.0405	0.0375	0.039	0.0435	0.0555	0.048	0.0555	0.039	0.045	0.0405	0.0375
Cr	0	0.0015	0	0	0	0	0	0	0	0	0	0	0	0	0	0	0.0015	0	0	0	0	0	0	0	0	0	0	0	0	0	0	0	0	0	0	0	0	0	0	0	0	0	0	0	0	0	0	0	0
Fe2	1.23	1.2255	1.1895	1.194	1.2045	1.2285	1.224	1.1445	1.143	1.149	1.1475	1.1415	1.143	1.101	1.128	1.1205	1.1445	1.1265	1.146	1.134	1.179	1.1835	1.1805	1.191	1.1895	1.194	1.137	1.1985	1.2105	1.1475	1.1715	1.1775	1.1865	0.735	0.7425	0.7425	0.75	0.777	0.7425	0.738	0.7185	0.762	0.7455	0.7425	0.7335	0.7245	0.7455	0.711	0.702
Mn	0.0345	0.036	0.033	0.0345	0.036	0.036	0.036	0.033	0.033	0.033	0.033	0.033	0.033	0.033	0.033	0.033	0.0345	0.033	0.0315	0.0345	0.0345	0.0345	0.0345	0.0345	0.0345	0.0345	0.0315	0.0345	0.036	0.0345	0.0345	0.0345	0.0345	0.021	0.021	0.0195	0.021	0.0225	0.021	0.021	0.021	0.021	0.021	0.021	0.0195	0.0195	0.021	0.0195	0.0195
Mg	0.5715	0.567	0.567	0.558	0.579	0.5715	0.573	0.6405	0.6405	0.6465	0.6465	0.6375	0.639	0.594	0.6375	0.636	0.6375	0.642	0.633	0.627	0.651	0.645	0.66	0.651	0.654	0.6585	0.6375	0.66	0.663	0.642	0.645	0.648	0.6495	0.534	0.5385	0.54	0.5415	0.5445	0.5415	0.5475	0.537	0.5475	0.504	0.51	0.501	0.5115	0.528	0.5415	0.534
Ca	0.186	0.183	0.225	0.204	0.1815	0.177	0.1755	0.1935	0.1935	0.1905	0.1935	0.198	0.195	0.1815	0.195	0.1965	0.189	0.1935	0.2025	0.207	0.204	0.2025	0.201	0.207	0.2055	0.201	0.2625	0.2025	0.2025	0.24	0.2055	0.2055	0.2025	0.7455	0.7605	0.756	0.7515	0.7035	0.747	0.7545	0.765	0.657	0.7395	0.729	0.729	0.729	0.7005	0.735	0.723
Na	0.003	0.006	0.006	0.006	0.0045	0.0045	0.0045	0.0045	0.003	0.0075	0.0045	0.0045	0.006	0.012	0.0045	0.0105	0.006	0.0045	0.0045	0.0075	0.0075	0.0045	0.006	0.006	0.0045	0.0045	0.006	0.0045	0.006	0.006	0.006	0.006	0.0045	0.015	0.021	0.018	0.018	0.015	0.018	0.0165	0.0195	0.0165	0.021	0.018	0.018	0.018	0.018	0.0255	0.018
K	0	0	0	0	0	0	0	0	0	0	0	0	0	0.009	0	0	0	0	0	0	0	0	0	0	0	0	0	0	0	0	0	0	0	0	0	0	0	0	0	0	0	0	0	0	0	0	0	0	0
Ni	0	0	0.0015	0	0	0	0	0	0	0	0	0	0	0.0015	0	0	0	0	0	0	0	0	0	0	0	0	0	0	0	0	0	0	0	0	0	0	0	0	0	0	0	0	0	0	0	0	0.0015	0	0
Total	4.017	4.017	4.017	4.0035	4.0065	4.014	4.011	4.014	4.011	4.02	4.0185	4.014	4.014	3.984	4.005	4.0095	4.0125	4.0035	4.014	4.0125	4.0455	4.041	4.05	4.05	4.0515	4.053	4.0455	4.0575	4.065	4.0425	4.038	4.044	4.0455	4.041	4.056	4.053	4.0545	4.044	4.0485	4.053	4.044	4.0185	4.0335	4.026	4.0185	4.014	4.0245	4.032	4.0125
Enstatite	28.7547	28.7016	28.6147	28.5276	29.4656	28.9074	29.0494	32.373	32.3976	32.5529	32.5283	32.2458	32.3217	31.6547	32.5172	32.5653	32.344	32.7217	31.9455	31.8598	32.0059	31.7578	32.3292	31.7716	31.918	32.0672	31.296	32.0233	31.9364	31.6334	31.8991	31.9055	31.8617	26.5078	26.3777	26.4901	26.5051	26.8889	26.6617	26.8382	26.5776	27.8413	25.3394	25.7381	25.5157	26.0305	26.7477	27.2453	27.2588
Ferrosilite	61.8868	62.0349	60.0303	61.0429	61.2977	62.1396	62.0532	57.8469	57.8149	57.855	57.7358	57.739	57.8149	58.6731	57.5363	57.3733	58.067	57.4159	57.835	57.622	57.9646	58.2718	57.8251	58.1259	58.0527	58.1446	55.8174	58.1514	58.3092	56.541	57.9377	57.9764	58.2046	36.4855	36.3703	36.4238	36.7107	38.3704	36.5583	36.1765	35.5605	38.749	37.4811	37.4716	37.3568	36.8702	37.766	35.7736	35.8346
Wollastonite	9.35849	9.26348	11.355	10.4294	9.23664	8.95296	8.89734	9.78014	9.78756	9.59215	9.73585	10.0152	9.86343	9.67226	9.94644	10.0614	9.58904	9.86239	10.2195	10.5183	10.0295	9.97046	9.8457	10.1025	10.0293	9.78817	12.8866	9.82533	9.75434	11.8256	10.1632	10.1182	9.93377	37.0067	37.252	37.0861	36.7841	34.7407	36.7799	36.9853	37.8619	33.4096	37.1795	36.7903	37.1276	37.0992	35.4863	36.9811	36.9066
total	100	100	100	100	100	100	100	100	100	100	100	100	100	100	100	100	100	100	100	100	100	100	100	100	100	100	100	100	100	100	100	100	100	100	100	100	100	100	100	100	100	100	100	100	100	100	100	100	100
Mg#	31.7236	31.6318	32.2801	31.8493	32.4643	31.75	31.8865	35.8824	35.9125	36.0067	36.0368	35.8347	35.8586	35.0442	36.1088	36.2084	35.7744	36.302	35.5818	35.6048	35.5738	35.2748	35.8598	35.342	35.476	35.5466	35.9256	35.5125	35.3883	35.8759	35.5078	35.4971	35.3758	42.0804	42.0375	42.1053	41.928	41.2032	42.1729	42.5904	42.7718	41.8099	40.3361	40.7186	40.5832	41.3835	41.4605	43.2335	43.2039
Steer Basin Member
	RC-10.1-004
	pigeonite	pigeonite	pigeonite	pigeonite	pigeonite	pigeonite	pigeonite	pigeonite	pigeonite	pigeonite	pigeonite	pigeonite	pigeonite	pigeonite	pigeonite	pigeonite	pigeonite	pigeonite	pigeonite	pigeonite	augite	augite	augite	augite	augite	augite	augite	augite
	core	core	rim	core	core	core	core	core	core	rim	core	core	core	core	core	core	core	core	rim	core	core	core	core	core	core	core	rim	core
	single	single	single	cluster	single	single	single	single	single	single	single	single	single	cluster	cluster	cluster	single	cluster	cluster	cluster	single	cluster	cluster	single	cluster	cluster	cluster	cluster
SiO2	49.526	49.831	49.136	49.538	49.331	49.395	49.348	49.807	49.857	49.113	49.833	49.628	49.386	49.27	49.854	49.364	49.644	49.161	49.049	49.302	50.367	49.84	49.813	48.187	50.085	50.34	49.499	49.941
TiO2	0.192	0.239	0.177	0.238	0.189	0.229	0.187	0.194	0.17	0.194	0.212	0.247	0.235	0.132	0.216	0.198	0.181	0.295	0.212	0.123	0.371	0.337	0.371	0.317	0.397	0.321	0.334	0.283
Al2O3	0.403	0.361	0.411	0.431	0.414	0.361	0.381	0.649	0.271	0.647	0.4	0.376	0.443	0.3	0.386	0.346	0.331	0.357	0.352	0.401	0.762	0.802	0.842	0.729	0.796	1.042	0.814	0.778
Cr2O3	0.009	0	0.02	0.052	0	0.029	0	0.015	0.021	0	0.026	0.062	0	0	0	0	0	0	0	0	0.019	0	0	0.021	0	0	0.013	0
FeO	34.312	34.528	34.275	33.134	34.647	34.222	34.251	33.324	34.264	32.846	33.948	33.847	34.2	34.253	33.712	35.739	34.587	33.553	33.6	34.499	22.772	23.832	22.4	22.464	22.682	22.418	22.582	21.764
MnO	0.974	0.871	0.926	0.96	0.961	1.001	0.914	0.9	0.929	0.97	0.824	1.014	0.971	0.945	0.911	1.041	0.899	0.96	0.923	0.906	0.554	0.638	0.611	0.638	0.641	0.525	0.596	0.562
MgO	9.824	9.822	9.76	9.601	9.673	9.943	10.044	9.84	9.845	9.66	9.83	9.658	9.952	10.005	9.882	8.799	9.898	9.674	9.921	10.002	8.56	8.637	8.425	8.09	8.48	8.602	8.344	8.375
CaO	4.749	4.72	4.71	5.722	4.648	4.75	4.705	5.984	4.652	4.524	4.636	4.681	4.699	4.78	4.69	4.42	4.681	4.641	4.812	4.679	16.834	15.347	16.709	16.375	16.7	16.661	16.917	17.026
Na2O	0.073	0.056	0.006	0.108	0	0.141	0.072	0.071	0.034	0.082	0.066	0.017	0.008	0.001	0.098	0	0.04	0.159	0.102	0	0.195	0.13	0.237	0.158	0.232	0.197	0.28	0.22
K2O	0.042	0	0	0	0	0	0.021	0.036	0	0.031	0	0	0	0.013	0.016	0	0.003	0	0	0.001	0.005	0	0.006	0.023	0.013	0.004	0.024	0.005
NiO	0.008	0.021	0.035	0.01	0	0.008	0.007	0.004	0	0.005	0	0.032	0	0	0.001	0.034	0.023	0	0.024	0.009	0.029	0.034	0	0.016	0	0.006	0.021	0.028
Total	100.112	100.449	99.456	99.794	99.863	100.079	99.93	100.824	100.043	98.072	99.775	99.562	99.894	99.699	99.766	99.941	100.287	98.8	98.995	99.922	100.468	99.597	99.414	97.018	100.026	100.116	99.424	98.982
O	6	6	6	6	6	6	6	6	6	6	6	6	6	6	6	6	6	6	6	6	6	6	6	6	6	6	6	6
Si	1.9887	1.99266	1.98708	1.99032	1.98822	1.98468	1.98486	1.98066	1.9995	2.00046	2.00004	1.9986	1.98588	1.9872	2.00022	1.99734	1.99026	1.99542	1.9887	1.98468	1.97274	1.97322	1.97124	1.96308	1.97112	1.97316	1.96404	1.98012
Ti	0.00582	0.0072	0.0054	0.0072	0.0057	0.0069	0.00564	0.00582	0.0051	0.00594	0.00642	0.0075	0.00708	0.00402	0.00654	0.006	0.00546	0.009	0.00648	0.00372	0.01092	0.01002	0.01104	0.00972	0.01176	0.00948	0.00996	0.00846
Al	0.01908	0.01704	0.01962	0.0204	0.01968	0.0171	0.01806	0.03042	0.01284	0.03108	0.0189	0.01782	0.021	0.01428	0.01824	0.0165	0.01566	0.0171	0.0168	0.01902	0.03516	0.03744	0.0393	0.03498	0.0369	0.04812	0.0381	0.03636
Cr	0.0003	0	0.00066	0.00168	0	0.0009	0	0.00048	0.00066	0	0.00084	0.00198	0	0	0	0	0	0	0	0	0.0006	0	0	0.00066	0	0	0.00042	0
Fe2	1.1523	1.1547	1.1592	1.11336	1.16784	1.14996	1.15218	1.10832	1.14924	1.11888	1.13946	1.14	1.15014	1.15542	1.13118	1.20936	1.15962	1.13898	1.13934	1.16148	0.74592	0.78912	0.74136	0.76536	0.74658	0.73488	0.74934	0.72168
Mn	0.03312	0.02952	0.03174	0.0327	0.03282	0.03408	0.03114	0.0303	0.03156	0.03348	0.02802	0.03462	0.03306	0.03228	0.03096	0.0357	0.03054	0.033	0.03168	0.0309	0.01836	0.02142	0.02046	0.02202	0.02136	0.01746	0.02004	0.0189
Mg	0.58806	0.58548	0.58836	0.57504	0.58116	0.59556	0.60222	0.58332	0.58854	0.58656	0.58812	0.57978	0.59658	0.60156	0.59106	0.5307	0.59154	0.58536	0.59964	0.60018	0.4998	0.50976	0.49698	0.49128	0.49752	0.50262	0.49356	0.495
Ca	0.20436	0.20226	0.20412	0.24636	0.2007	0.20448	0.2028	0.255	0.19992	0.19746	0.19938	0.20202	0.20244	0.20658	0.2016	0.19164	0.20106	0.20184	0.20904	0.20184	0.7065	0.65106	0.70848	0.71478	0.70422	0.69978	0.71922	0.72336
Na	0.0057	0.00432	0.00048	0.0084	0	0.01098	0.00564	0.00546	0.00264	0.00648	0.00516	0.00132	0.0006	6e-05	0.00762	0	0.00312	0.01254	0.00804	0	0.01482	0.00996	0.01818	0.01248	0.0177	0.015	0.02154	0.01692
K	0.00216	0	0	0	0	0	0.00108	0.0018	0	0.00162	0	0	0	0.00066	0.00084	0	0.00018	0	0	6e-05	0.00024	0	0.0003	0.0012	0.00066	0.00018	0.0012	0.00024
Ni	0.00024	0.00066	0.00114	0.0003	0	0.00024	0.00024	0.00012	0	0.00018	0	0.00102	0	0	6e-05	0.00108	0.00072	0	0.00078	0.0003	0.0009	0.00108	0	0.00054	0	0.00018	0.00066	0.0009
Total	3.99972	3.99384	3.99768	3.9957	3.99618	4.00488	4.0038	4.0017	3.99	3.98208	3.98628	3.98466	3.99684	4.00206	3.98832	3.98838	3.9981	3.99324	4.00044	4.00212	4.00596	4.00302	4.00734	4.01616	4.00782	4.00086	4.01814	4.00188
Enstatite	30.2388	30.1415	30.1463	29.7215	29.8077	30.5415	30.7695	29.9655	30.3731	30.8245	30.5206	30.1686	30.607	30.6362	30.7229	27.4732	30.3009	30.3897	30.782	30.5668	25.6016	26.1423	25.5278	24.9201	25.5358	25.9446	25.1544	25.5149
Ferrosilite	59.2527	59.4459	59.395	57.5451	59.8984	58.9723	58.8688	56.935	59.3095	58.7987	59.1325	59.3194	59.007	58.8431	58.798	62.606	59.4001	59.1315	58.4871	59.1536	38.2088	40.4689	38.0806	38.8228	38.3192	37.9336	38.1903	37.1992
Wollastonite	10.5085	10.4127	10.4587	12.7334	10.2939	10.4862	10.3617	13.0995	10.3174	10.3768	10.3469	10.512	10.386	10.5207	10.479	9.9208	10.299	10.4788	10.7309	10.2796	36.1896	33.3887	36.3917	36.2571	36.145	36.1218	36.6553	37.2858
total	100	100	100	100	100	100	100	100	100	100	100	100	100	100	100	100	100	100	100	100	100	100	100	100	100	100	100	100
Mg#	33.7896	33.6448	33.6675	34.0583	33.2281	34.1193	34.3263	34.4825	33.8673	34.3935	34.043	33.7125	34.1543	34.2383	34.3193	30.4989	33.7799	33.9469	34.4823	34.069	40.1214	39.2461	40.1328	39.0947	39.9904	40.6158	39.7104	40.6845
Big Bluff Member
	RC-10.1-011
	augite	augite	augite	augite	augite	augite	augite	augite	augite	augite	augite	augite	augite	augite	augite	augite	augite	augite	augite	augite	augite	augite
	core	core	core	core	core	core	core	core	core	core	core	core	core	core	core	core	core	core	core	core	core	core
	single	single	single	single	single	single	single	single	single	single	single	single	single	single	single	cluster	cluster	cluster	single	single	single	single
SiO2	49.238	47.604	47.754	47.684	48.278	47.21	46.626	46.981	46.368	47.441	47.306	46.186	47.51	47.544	47.229	47.781	47.686	48.536	47.911	47.978	47.86	47.316
TiO2	0.413	0.413	0.336	0.291	0.331	0.323	0.337	0.352	0.337	0.337	0.374	0.336	0.339	0.38	0.295	0.317	0.317	0.343	0.434	0.427	0.343	0.317
Al2O3	0.985	0.716	0.648	0.687	0.766	0.612	0.611	0.613	0.634	0.561	0.624	0.668	0.612	0.594	0.5	0.839	0.617	0.603	0.612	0.624	0.583	0.652
Cr2O3	0.012	0	0.034	0	0.003	0.013	0	0.003	0	0.01	0	0.012	0	0.024	0.006	0	0.019	0.017	0.024	0.008	0.005	0
FeO	27.86	28.144	26.721	25.844	26.539	26.775	25.433	25.595	25.192	27.015	25.593	27.704	27.272	27.179	32.947	25.936	27.883	27.267	27.931	27.972	27.384	27.19
MnO	0.652	0.616	0.622	0.64	0.671	0.679	0.57	0.561	0.563	0.665	0.588	0.67	0.603	0.597	0.853	0.575	0.619	0.612	0.613	0.629	0.611	0.607
MgO	3.559	3.555	4.178	4.506	4.536	3.966	3.6	3.692	3.76	3.9	3.751	3.799	3.762	3.578	3.884	3.737	3.537	3.746	3.364	3.262	3.319	3.555
CaO	15.823	17.449	16.687	16.082	14.843	15.863	17.216	17.274	17.386	15.818	17.185	16.92	18.218	18.132	13.24	17.094	17.846	18.046	18.263	18.398	18.297	18.104
Na2O	0.187	0.134	0.284	0.212	0.219	0.169	0.235	0.284	0.155	0.258	0.22	0.178	0.201	0.228	0.175	0.3	0.176	0.236	0.239	0.165	0.208	0.244
K2O	0.373	0	0	0	0	0	0	0	0	0	0.018	0	0	0	0	0.01	0	0	0	0	0	0
NiO	0	0.008	0	0	0	0.013	0.001	0	0	0	0	0	0.007	0.004	0	0.02	0.022	0	0	0	0	0
BaO	0	0	0	0.026	0.007	0	0.013	0.055	0	0.027	0	0.011	0	0	0	0	0	0.001	0	0.015	0.039	0.027
Total	99.102	98.638	97.265	95.971	96.193	95.623	94.642	95.41	94.395	96.032	95.659	96.485	98.524	98.26	99.13	96.609	98.72	99.407	99.391	99.479	98.65	98.012
O	6	6	6	6	6	6	6	6	6	6	6	6	6	6	6	6	6	6	6	6	6	6
Si	2.004	1.9665	1.983	1.9965	2.0115	1.9935	1.989	1.989	1.983	1.9965	1.9935	1.9545	1.962	1.968	1.965	1.992	1.968	1.9785	1.965	1.9665	1.974	1.965
Ti	0.012	0.0135	0.0105	0.009	0.0105	0.0105	0.0105	0.0105	0.0105	0.0105	0.012	0.0105	0.0105	0.012	0.009	0.0105	0.0105	0.0105	0.0135	0.0135	0.0105	0.0105
Al	0.048	0.0345	0.0315	0.0345	0.0375	0.03	0.03	0.03	0.0315	0.0285	0.0315	0.033	0.03	0.0285	0.024	0.0405	0.03	0.0285	0.03	0.03	0.0285	0.0315
Cr	0	0	0.0015	0	0	0	0	0	0	0	0	0	0	0.0015	0	0	0	0	0.0015	0	0	0
Fe2	0.948	0.972	0.9285	0.9045	0.924	0.9465	0.9075	0.906	0.9015	0.951	0.9015	0.981	0.942	0.9405	1.146	0.9045	0.963	0.93	0.9585	0.9585	0.945	0.945
Mn	0.0225	0.021	0.0225	0.0225	0.024	0.024	0.021	0.0195	0.021	0.024	0.021	0.024	0.021	0.021	0.03	0.021	0.021	0.021	0.021	0.0225	0.021	0.021
Mg	0.216	0.219	0.258	0.2805	0.282	0.249	0.2295	0.2325	0.24	0.2445	0.2355	0.24	0.231	0.2205	0.2415	0.2325	0.2175	0.228	0.2055	0.1995	0.204	0.2205
Ca	0.69	0.7725	0.7425	0.7215	0.663	0.7185	0.7875	0.783	0.7965	0.7125	0.7755	0.7665	0.807	0.804	0.5895	0.7635	0.789	0.789	0.8025	0.8085	0.8085	0.8055
Na	0.015	0.0105	0.0225	0.0165	0.018	0.0135	0.0195	0.024	0.0135	0.021	0.018	0.015	0.0165	0.018	0.0135	0.024	0.0135	0.018	0.0195	0.0135	0.0165	0.0195
K	0.0195	0	0	0	0	0	0	0	0	0	0.0015	0	0	0	0	0	0	0	0	0	0	0
Ni	0	0	0	0	0	0	0	0	0	0	0.0015	0	0	0	0	0	0	0	0	0	0	0
Ba	0	0	0	0	0	0	0	0	0	0	0	0	0	0	0	0	0	0	0	0	0	0
Total	3.9765	4.0095	4.0005	3.987	3.969	3.987	3.9945	3.996	3.996	3.99	3.9885	4.0245	4.02	4.014	4.02	3.99	4.014	4.005	4.0155	4.011	4.0095	4.0185
Enstatite	11.6505	11.1536	13.3748	14.7128	15.0883	13.0094	11.9252	12.0999	12.3839	12.8145	12.3137	12.0755	11.6667	11.2214	12.2155	12.2336	11.0434	11.7103	10.45	10.1449	10.4215	11.1872
Ferrosilite	51.1327	49.5034	48.1337	47.443	49.4382	49.4514	47.1551	47.1507	46.517	49.8428	47.1373	49.3585	47.5758	47.8626	57.9666	47.5927	48.8957	47.7658	48.7414	48.7414	48.2759	47.9452
Wollastonite	37.2168	39.343	38.4914	37.8442	35.4735	37.5392	40.9197	40.7494	41.0991	37.3428	40.549	38.566	40.7576	40.916	29.8179	40.1736	40.0609	40.5239	40.8085	41.1137	41.3027	40.8676
total	100	100	100	100	100	100	100	100	100	100	100	100	100	100	100	100	100	100	100	100	100	100
Mg#	18.5567	18.3879	21.7446	23.6709	23.3831	20.8281	20.1847	20.4216	21.025	20.4517	20.7124	19.656	19.6931	18.9922	17.4054	20.4485	18.4244	19.6891	17.6546	17.228	17.7546	18.9189
Magpie Basin Member
	RC-10.2-004
	pigeonite	pigeonite	pigeonite	pigeonite	pigeonite	pigeonite	pigeonite	pigeonite	pigeonite	pigeonite	pigeonite	pigeonite	pigeonite	pigeonite	pigeonite	pigeonite	pigeonite	augite	augite	augite	augite	augite	augite	augite	augite	augite	augite	augite	augite	augite	augite	augite	augite	augite	augite	augite	augite	augite	augite	augite	augite	augite	augite	augite	augite	augite	augite	augite	augite
	core	core	core	core	core	core	core	core	core	core	core	core	core	core	core	core	core	core	core	core	core	core	core	rim	core	core	core	core	core	core	core	core	core	core	core	core	core	core	core	core	core	core	core	core	core	core	core	core	core
	cluster	cluster	cluster	cluster	cluster	cluster	cluster	cluster	cluster	cluster	cluster	cluster	cluster	cluster	cluster	cluster	cluster	cluster	cluster	cluster	cluster	cluster	cluster	cluster	cluster	cluster	cluster	cluster	cluster	cluster	cluster	cluster	cluster	cluster	cluster	cluster	cluster	cluster	cluster	cluster	cluster	cluster	cluster	cluster	cluster	cluster	cluster	cluster	cluster
SiO2	46.944	47.381	46.149	46.434	46.925	46.513	46.447	46.541	47.118	46.976	47.006	46.972	46.956	47.205	47.028	46.915	46.898	48.171	48.154	48.234	48.287	48.294	48.019	46.109	47.35	47.49	47.594	47.235	48.099	47.83	48.14	48.016	47.768	47.882	47.788	47.647	47.824	47.853	47.429	47.44	47.778	47.729	47.918	47.978	48.166	47.909	48.007	47.897	48.045
TiO2	0.136	0.201	0.213	0.254	0.193	0.208	0.173	0.181	0.312	0.14	0.191	0.158	0.2	0.156	0.246	0.113	0.185	0.308	0.279	0.325	0.3	0.342	0.35	0.328	0.379	0.297	0.304	0.278	0.263	0.249	0.276	0.307	0.291	0.299	0.319	0.315	0.312	0.302	0.322	0.27	0.339	0.287	0.338	0.33	0.32	0.316	0.311	0.312	0.254
Al2O3	0.424	0.492	0.258	0.251	0.242	0.268	0.24	0.242	0.855	0.364	0.257	0.372	0.281	0.293	0.274	0.269	0.284	0.634	0.626	0.648	0.693	0.647	0.628	0.681	0.635	0.631	0.645	0.694	0.605	0.602	0.698	0.683	0.662	0.659	0.698	0.71	0.677	0.683	0.664	0.631	0.617	0.611	0.713	0.702	0.69	0.69	0.701	0.675	0.705
Cr2O3	0	0	0.026	0.005	0	0	0.001	0.007	0.025	0.019	0.017	0.021	0.018	0.006	0.024	0.016	0	0	0	0	0.015	0.002	0.023	0	0.018	0.003	0.02	0.023	0	0	0.006	0.005	0	0.001	0.004	0	0	0.024	0	0.016	0.018	0	0.007	0.006	0	0.018	0	0.007	0
FeO	38.41	37.508	39.451	39.464	39.662	39.257	39.739	39.356	30.849	39.033	39.51	39.025	39.801	39.646	39.518	39.623	38.964	26.08	26.061	25.459	26.124	26.072	27.036	25.503	26.51	25.824	25.899	25.552	25.915	26.027	25.69	26.296	25.913	26.339	25.957	25.796	26.212	25.937	25.614	26.355	25.307	25.238	25.938	25.438	25.184	25.77	25.881	26.349	26.089
MnO	0.99	0.968	1.066	1.03	1.032	1.053	1.058	1.039	0.792	1.04	1.025	1.057	1.05	1.036	1.045	1.064	1.043	0.675	0.65	0.637	0.658	0.642	0.67	0.662	0.663	0.609	0.676	0.641	0.634	0.625	0.661	0.614	0.663	0.665	0.646	0.631	0.661	0.665	0.658	0.657	0.62	0.606	0.652	0.658	0.641	0.649	0.672	0.622	0.647
MgO	6.648	6.454	6.816	7.004	6.936	6.853	6.854	6.857	5.893	6.819	6.733	6.746	6.839	6.723	6.924	7.126	6.997	6.293	6.061	6.135	6.247	6.105	6.089	5.945	6.204	5.985	6.161	5.997	6.087	5.993	6.501	6.395	6.239	6.362	6.306	6.418	6.394	6.383	6.137	6.094	6.12	6.052	6.463	6.434	6.967	6.428	6.73	6.055	6.047
CaO	4.498	5.419	4.522	4.236	4.334	4.263	4.311	4.278	10.844	4.174	4.258	4.306	4.274	4.118	4.193	4.199	4.275	16.663	16.878	16.907	16.471	16.644	15.6	17.04	16.475	16.913	16.5	16.21	16.798	16.715	16.539	16.566	16.561	16.405	16.372	16.448	16.545	16.403	16.846	16.322	17.274	17.421	16.413	16.324	16.668	16.514	16.453	16.524	16.848
Na2O	0.083	0.047	0.098	0.047	0.018	0.044	0.071	0.059	0.197	0.078	0.06	0.004	0.088	0.034	0.071	0.047	0.05	0.245	0.213	0.189	0.279	0.231	0.187	0.222	0.204	0.232	0.169	0.228	0.208	0.182	0.215	0.228	0.195	0.256	0.21	0.18	0.227	0.217	0.196	0.216	0.267	0.265	0.164	0.194	0.233	0.244	0.19	0.194	0.216
K2O	0.007	0.023	0	0	0	0	0	0	0.083	0.006	0	0	0	0	0	0	0	0	0	0	0	0	0	0.007	0	0	0.022	0.031	0	0	0	0	0	0	0	0	0	0	0	0	0	0	0	0	0	0	0	0	0
NiO	0	0.01	0.01	0	0	0.021	0.001	0	0.011	0.001	0	0.006	0.019	0	0.009	0	0.01	0	0.023	0.004	0.008	0	0	0.016	0	0	0	0.016	0.014	0.027	0	0	0.02	0	0.012	0	0	0.015	0.014	0	0.003	0.005	0.015	0.005	0.011	0.012	0.022	0.019	0.001
Total	98.14	98.53	98.609	98.745	99.352	98.517	98.905	98.605	96.979	98.671	99.057	98.707	99.526	99.218	99.335	99.402	98.757	99.097	98.968	98.562	99.084	98.979	98.602	96.513	98.438	98.046	97.99	96.905	98.623	98.26	98.726	99.128	98.312	98.868	98.312	98.166	98.886	98.482	97.901	98.001	98.352	98.214	98.636	98.084	98.88	98.581	98.967	98.686	98.854
O	6	6	6	6	6	6	6	6	6	6	6	6	6	6	6	6	6	6	6	6	6	6	6	6	6	6	6	6	6	6	6	6	6	6	6	6	6	6	6	6	6	6	6	6	6	6	6	6	6
Si	1.9755	1.98	1.9485	1.953	1.9605	1.9605	1.9545	1.9605	1.9725	1.9695	1.968	1.9695	1.959	1.971	1.962	1.959	1.9665	1.956	1.959	1.9635	1.959	1.9605	1.962	1.932	1.9425	1.953	1.9545	1.959	1.9605	1.959	1.9575	1.95	1.9545	1.95	1.9545	1.9515	1.9485	1.953	1.95	1.953	1.953	1.9545	1.953	1.9605	1.9515	1.953	1.9485	1.956	1.956
Ti	0.0045	0.006	0.0075	0.0075	0.006	0.006	0.006	0.006	0.0105	0.0045	0.006	0.0045	0.006	0.0045	0.0075	0.003	0.006	0.009	0.009	0.0105	0.009	0.0105	0.0105	0.0105	0.012	0.009	0.009	0.009	0.0075	0.0075	0.009	0.009	0.009	0.009	0.0105	0.009	0.009	0.009	0.0105	0.009	0.0105	0.009	0.0105	0.0105	0.009	0.009	0.009	0.009	0.0075
Al	0.021	0.024	0.0135	0.012	0.012	0.0135	0.012	0.012	0.042	0.018	0.012	0.018	0.0135	0.015	0.0135	0.0135	0.0135	0.03	0.03	0.0315	0.033	0.0315	0.03	0.033	0.03	0.03	0.0315	0.0345	0.0285	0.0285	0.033	0.033	0.0315	0.0315	0.033	0.0345	0.033	0.033	0.0315	0.03	0.03	0.03	0.0345	0.0345	0.033	0.033	0.033	0.033	0.0345
Cr	0	0	0.0015	0	0	0	0	0	0.0015	0	0	0	0	0	0.0015	0	0	0	0	0	0	0	0	0	0	0	0	0.0015	0	0	0	0	0	0	0	0	0	0.0015	0	0	0	0	0	0	0	0	0	0	0
Fe2	1.3515	1.311	1.3935	1.389	1.386	1.383	1.398	1.386	1.08	1.3695	1.383	1.368	1.389	1.3845	1.38	1.383	1.3665	0.885	0.8865	0.867	0.8865	0.885	0.924	0.894	0.909	0.888	0.8895	0.8865	0.8835	0.8925	0.873	0.8925	0.8865	0.897	0.888	0.8835	0.8925	0.885	0.8805	0.9075	0.8655	0.864	0.8835	0.87	0.8535	0.879	0.879	0.9	0.888
Mn	0.036	0.0345	0.0375	0.036	0.036	0.0375	0.0375	0.0375	0.0285	0.0375	0.036	0.0375	0.0375	0.036	0.0375	0.0375	0.0375	0.0225	0.0225	0.0225	0.0225	0.0225	0.0225	0.024	0.0225	0.021	0.024	0.0225	0.0225	0.021	0.0225	0.021	0.0225	0.0225	0.0225	0.0225	0.0225	0.0225	0.0225	0.0225	0.021	0.021	0.0225	0.0225	0.0225	0.0225	0.0225	0.021	0.0225
Mg	0.417	0.402	0.429	0.4395	0.432	0.4305	0.4305	0.4305	0.3675	0.426	0.42	0.4215	0.426	0.4185	0.4305	0.444	0.438	0.381	0.3675	0.372	0.378	0.369	0.3705	0.372	0.3795	0.3675	0.3765	0.3705	0.3705	0.366	0.3945	0.387	0.381	0.387	0.384	0.3915	0.3885	0.3885	0.3765	0.3735	0.3735	0.369	0.393	0.3915	0.42	0.39	0.408	0.369	0.3675
Ca	0.2025	0.243	0.204	0.1905	0.1935	0.192	0.195	0.1935	0.486	0.1875	0.1905	0.1935	0.1905	0.1845	0.1875	0.1875	0.192	0.7245	0.735	0.738	0.7155	0.7245	0.6825	0.765	0.7245	0.7455	0.726	0.72	0.7335	0.7335	0.72	0.7215	0.726	0.7155	0.717	0.7215	0.7215	0.717	0.7425	0.72	0.756	0.765	0.717	0.7155	0.723	0.7215	0.7155	0.723	0.735
Na	0.006	0.0045	0.0075	0.0045	0.0015	0.003	0.006	0.0045	0.0165	0.006	0.0045	0	0.0075	0.003	0.006	0.0045	0.0045	0.0195	0.0165	0.015	0.0225	0.018	0.015	0.018	0.0165	0.018	0.0135	0.018	0.0165	0.015	0.0165	0.018	0.015	0.0195	0.0165	0.015	0.018	0.0165	0.015	0.0165	0.021	0.021	0.0135	0.015	0.018	0.0195	0.015	0.015	0.0165
K	0	0.0015	0	0	0	0	0	0	0.0045	0	0	0	0	0	0	0	0	0	0	0	0	0	0	0	0	0	0.0015	0.0015	0	0	0	0	0	0	0	0	0	0	0	0	0	0	0	0	0	0	0	0	0
Ni	0	0	0	0	0	0	0	0	0	0	0	0	0	0	0	0	0	0	0	0	0	0	0	0	0	0	0	0	0	0.0015	0	0	0	0	0	0	0	0	0	0	0	0	0	0	0	0	0	0	0
Total	4.014	4.005	4.0425	4.0335	4.029	4.029	4.038	4.0305	4.0065	4.02	4.0215	4.0155	4.0305	4.0185	4.026	4.0335	4.023	4.029	4.026	4.0185	4.026	4.0215	4.0185	4.05	4.038	4.032	4.0275	4.0245	4.0245	4.026	4.026	4.0335	4.0275	4.035	4.0275	4.029	4.035	4.029	4.032	4.032	4.032	4.032	4.026	4.02	4.032	4.0305	4.032	4.026	4.0275
Enstatite	10.274	12.4233	10.0666	9.43536	9.61969	9.57367	9.63677	9.62687	25.1358	9.45537	9.55606	9.75794	9.49888	9.28302	9.38438	9.30752	9.61683	36.3979	36.9532	37.3293	36.1364	36.6187	34.522	37.6662	35.9911	37.2564	36.4458	36.4188	36.9057	36.8223	36.2264	36.057	36.4184	35.7839	36.0483	36.1382	36.03	36.0211	37.1343	35.982	37.8947	38.2883	35.9669	36.1912	36.2134	36.2472	35.7303	36.2952	36.9254
Ferrosilite	21.1568	20.5521	21.1695	21.7682	21.4765	21.466	21.275	21.4179	19.007	21.4826	21.0685	21.2557	21.2416	21.0566	21.5465	22.0402	21.9384	19.1409	18.4766	18.8164	19.0909	18.6505	18.7405	18.3161	18.8525	18.3658	18.9006	18.7405	18.6415	18.3735	19.8491	19.3403	19.1121	19.3548	19.3062	19.6093	19.4007	19.5177	18.8297	18.6657	18.7218	18.4685	19.7141	19.8027	21.0368	19.5931	20.3745	18.5241	18.4627
Wollastonite	68.5693	67.0245	68.7639	68.7964	68.9038	68.9604	69.0882	68.9552	55.8573	69.062	69.3755	68.9864	69.2595	69.6604	69.0691	68.6523	68.4448	44.4612	44.5701	43.8543	44.7727	44.7309	46.7375	44.0177	45.1565	44.3778	44.6536	44.8407	44.4528	44.8042	43.9245	44.6027	44.4695	44.8612	44.6456	44.2524	44.5693	44.4612	44.036	45.3523	43.3835	43.2432	44.319	44.0061	42.7498	44.1598	43.8951	45.1807	44.6119
total	100	100	100	100	100	100	100	100	100	100	100	100	100	100	100	100	100	100	100	100	100	100	100	100	100	100	100	100	100	100	100	100	100	100	100	100	100	100	100	100	100	100	100	100	100	100	100	100	100
Mg#	23.5793	23.4676	23.5391	24.0361	23.7624	23.7386	23.5439	23.6994	25.3886	23.726	23.2945	23.5541	23.4711	23.2113	23.778	24.3021	24.2727	30.0948	29.3062	30.0242	29.8932	29.4258	28.6211	29.3839	29.4529	29.2712	29.7393	29.4749	29.5455	29.0822	31.1243	30.2462	30.0592	30.1402	30.1887	30.7059	30.3279	30.5065	29.9523	29.1569	30.1453	29.927	30.7873	31.0345	32.98	30.7329	31.7016	29.078	29.2712
[truncated: 80 more columns]

## Sheet: Table S3_Argon data
Table S3: Complete argon data set including J-values for all 40Ar/39Ar single feldspar fusion experiments. Ages are calculated using the recommended age for the Fish Canyon sanidine (FCs) neutron fluence monitor of 28.172 ± 0.028 Ma (Rivera et al., 2011)
and 40K decay constants of Min et al. (2000).
Run_ID	Sample	Material	Ar40	± 1s	Ar39	± 1s	Ar38	± 1s	Ar37	± 1s	Ar36	± 1s	Ca/K	40Ar*/39ArK	± 1s	%40Ar*	Age [Ma]	± 1s	± 1s (including J)
Shoshone Falls Rhyolite (sample A2 751.6-754)
EK65DB19; J = 0.0020624 ± 0.00000028
90632-69A		Plagioclase	0.20842	0.0120814	0.079831	0.0003265	0.0010927	0.000164	0.000426	0.0003444	0.0002864	6.36e-05	2.54837	1.64036	0.294011	62.9147	6.10659	1.09267	1.0927	1
90632-68A		Plagioclase	6.85992	0.0133282	0.869877	0.0015146	0.010355	0.0002062	0.0001679	0.0003257	0.0003123	6.39e-05	0.0920832	7.76684	0.0309122	98.687	28.733	0.113454	0.119732	2
90632-67A		Plagioclase	0.1688	0.0120599	0.049713	0.0002766	0.0006438	0.0001575	0.000296	0.0003362	0.0002602	6.32e-05	2.83918	1.94502	0.469512	57.3493	7.23847	1.74382	1.74384	3
90632-66A		Plagioclase	0.14569	0.0120702	0.056595	0.0002766	0.0006019	0.0001587	0.000407	0.0003362	0.0001776	6.39e-05	3.42744	1.77362	0.415337	68.969	6.60176	1.54315	1.54317	4
90632-65A		Plagioclase	0.112684	0.0120391	0.035916	0.0002581	0.0001724	0.0001436	0.000339	0.0003245	0.0001321	6.46e-05	4.4962	2.21852	0.657591	70.7534	8.25399	2.44099	2.44102	5
90632-64A		Plagioclase	0.0557591	0.0024443	0.0238799	0.0001243	0.000317	6.58e-05	1.42e-05	4.59e-05	8.69e-05	2.23e-05	0.199192	1.25379	0.29859	53.8077	4.66937	1.11057	1.11059	6
90632-63A		Plagioclase	0.0239286	0.0024397	0.0099133	0.0001051	3.38e-05	6.05e-05	8e-05	4.59e-05	3.72e-05	2.22e-05	2.70971	1.40061	0.717819	58.0932	5.21534	2.66904	2.66905	7
90632-62A		Plagioclase	0.0136473	0.0024398	0.0071223	0.0001043	3.68e-05	6.13e-05	-2.72e-05	4.33e-05	-1e-05	2.23e-05	-1.28165	2.27771	1.00031	119.188	8.47371	3.71272	3.71274	8
90632-61A		Plagioclase	0.0708479	0.0024412	0.0196392	0.0001133	0.000284	6.18e-05	-1.01e-05	4.96e-05	7.82e-05	2.22e-05	-0.172364	2.40646	0.362958	66.8475	8.95149	1.34679	1.34684	9
90632-60A		Plagioclase	0.0302466	0.0024437	0.0148998	0.0001089	0.000125	6.22e-05	1.45e-05	4.54e-05	1.19e-05	2.22e-05	0.325825	1.79984	0.477982	88.8464	6.69918	1.77581	1.77583	10
90632-59A		Plagioclase	0.0439585	0.0024438	0.0218368	0.0001249	0.0003498	6.05e-05	3.45e-05	4.74e-05	5.16e-05	2.23e-05	0.529275	1.32584	0.327108	65.9946	4.93731	1.21646	1.21648	11
90632-58A		Plagioclase	0.0198792	0.0024422	0.011352	0.0001071	9.88e-05	5.86e-05	7.14e-05	4.85e-05	-1.06e-05	2.23e-05	2.10375	2.11027	0.628994	120.689	7.85213	2.33536	2.33538	12
90632-57A		Plagioclase	0.0609786	0.0024416	0.0244677	0.0001342	0.0003307	5.97e-05	3.63e-05	4.64e-05	4.88e-05	2.24e-05	0.495143	1.91261	0.292379	76.8933	7.11808	1.086	1.08604	13
90632-56A		Plagioclase	0.0400651	0.0024417	0.0202025	0.0001177	0.0002867	6.27e-05	-4.01884e-06	4.64e-05	1.84e-05	2.23e-05	-0.0664028	1.70504	0.353469	86.1664	6.34693	1.31347	1.3135	14
90632-55A		Plagioclase	0.0488691	0.0024434	0.0240068	0.0001281	0.0003268	6.05e-05	-1.75e-05	4.54e-05	1.82e-05	2.22e-05	-0.243458	1.79601	0.295899	88.43	6.68497	1.09933	1.09937	15
90632-54A		Plagioclase	0.0297133	0.0024412	0.0150565	0.0001099	0.0001762	5.93e-05	-1.51e-05	4.49e-05	-2.51603e-06	2.22e-05	-0.334399	2.00509	0.472293	101.839	7.46157	1.75393	1.75396	16
90632-53A		Plagioclase	0.0344815	0.0024399	0.0179477	0.0001183	0.0001758	6.05e-05	5.64555e-06	4.69e-05	9.69573e-06	2.24e-05	0.104835	1.75994	0.398467	91.8047	6.55095	1.48051	1.48054	17
90632-52A		Plagioclase	0.149549	0.0026184	0.0654398	0.0003728	0.0010529	6.19e-05	0.0002261	4.64e-05	0.0002216	2.25e-05	1.12843	1.31768	0.111304	57.7601	4.90698	0.413927	0.413979	18
90632-51A		Plagioclase	0.0605519	0.0024529	0.017442	0.0001135	0.0002674	6.48e-05	8.7e-05	4.8e-05	8.73e-05	2.24e-05	1.62862	2.04014	0.411682	58.8521	7.59174	1.52873	1.52876	19
90632-50A		Plagioclase	0.0491217	0.0024503	0.0190979	0.000122	0.0002599	5.87e-05	8.09e-05	4.74e-05	0.0001055	2.24e-05	1.38267	0.976562	0.374706	38.0289	3.63794	1.39447	1.39448	20
90632-49A		Plagioclase	0.0388252	0.0024457	0.0161184	0.0001208	0.0002402	6.06e-05	9.66e-05	4.59e-05	7.85e-05	2.22e-05	1.9552	1.0319	0.44042	42.9011	3.84387	1.63884	1.63885	21
90632-48A		Plagioclase	0.0444527	0.0024491	0.0200892	0.000127	0.0002849	6.33e-05	-2.49e-05	4.55e-05	4.64e-05	2.24e-05	-0.404133	1.50387	0.356457	68.1195	5.59925	1.32512	1.32514	22
90632-47A		Plagioclase	0.0280453	0.0024452	0.0110123	0.0001082	0.0002039	6.38e-05	1.13e-05	4.59e-05	1.44e-05	2.23e-05	0.334116	2.16556	0.647109	85.2025	8.05741	2.40234	2.40237	23
90632-46A		Plagioclase	0.0573214	0.0024495	0.0259317	0.0001296	0.000408	6.38e-05	6.79e-05	4.5e-05	5.69e-05	2.25e-05	0.851744	1.58703	0.277444	71.9289	5.90838	1.03122	1.03125	24
90632-45A		Plagioclase	0.0498139	0.0024506	0.0211089	0.0001226	0.0003486	6.14e-05	8.96e-05	4.6e-05	7.34e-05	2.24e-05	1.38013	1.37598	0.33954	58.4037	5.12376	1.26256	1.26258	25
90632-44A		Plagioclase	0.0332957	0.0024479	0.0136368	0.0001146	0.0002143	6.19e-05	-2.25081e-06	4.8e-05	5.56e-05	2.25e-05	-0.0535967	1.22023	0.528317	50.0839	4.54454	1.96515	1.96516	26
90632-43A		Plagioclase	0.170408	0.002639	0.0316009	0.0001871	0.0005314	6.28e-05	0.0001231	4.42e-05	0.0002903	2.31e-05	1.26447	2.69665	0.236015	50.0829	10.028	0.875233	0.875336	27
90632-42A		Plagioclase	0.0622445	0.0024573	0.0271318	0.0001543	0.0003996	6.1e-05	4.13e-05	4.55e-05	7.62e-05	2.26e-05	0.49375	1.47285	0.266493	64.3263	5.48393	0.990745	0.990772	28
90632-41A		Plagioclase	0.0523694	0.0024598	0.0205908	0.0001467	0.0003755	6.38e-05	0.0001203	4.65e-05	8.78e-05	2.24e-05	1.89476	1.34588	0.348004	52.9939	5.01183	1.29412	1.29413	29
90632-40A		Plagioclase	0.0471053	0.0024627	0.0175431	0.0001393	0.0005034	6.59e-05	2.43e-05	4.75e-05	9.83e-05	2.22e-05	0.449129	1.02905	0.406219	38.3986	3.83327	1.51158	1.51159	30
90632-39A		Plagioclase	0.114284	0.0025336	0.0322652	0.0002045	0.0006616	6.1e-05	9.35e-05	4.7e-05	0.0002034	2.28e-05	0.937519	1.69539	0.226604	47.946	6.31109	0.842064	0.842107	31
90632-38A		Plagioclase	0.140566	0.0025503	0.0488911	0.0002869	0.0009056	6.59e-05	0.0001335	4.75e-05	0.0001817	2.26e-05	0.883483	1.79838	0.148838	62.6611	6.69378	0.552968	0.553041	32
90632-37A		Plagioclase	0.120035	0.0025238	0.0454872	0.0002589	0.0008704	6.59e-05	0.0001528	4.65e-05	0.0002135	2.25e-05	1.08599	1.27935	0.158637	48.564	4.76441	0.589999	0.590034	33
90632-36A		Plagioclase	0.0942813	0.0025033	0.0223777	0.0001544	0.0004861	6.11e-05	5.87e-05	4.75e-05	0.0001509	2.27e-05	0.846168	2.23061	0.324889	53.0334	8.29888	1.20596	1.20602	34
90632-35A		Plagioclase	0.108788	0.0024932	0.0314389	0.0001787	0.0004972	6.19e-05	2.34e-05	4.7e-05	0.000143	2.27e-05	0.240041	2.10826	0.231463	61.0457	7.84468	0.859391	0.859456	35
90632-34A		Plagioclase	0.0595667	0.0024645	0.0229831	0.0001704	0.0004549	6.71e-05	4.92e-05	4.6e-05	0.0001352	2.26e-05	0.690685	0.862341	0.31487	33.3342	3.21281	1.17207	1.17208	36
90632-33A		Plagioclase	0.127955	0.0025518	0.0559012	0.0002775	0.000889	6.19e-05	0.000223	4.7e-05	0.0001546	2.31e-05	1.28597	1.51275	0.132636	66.2005	5.63227	0.493063	0.493121	37
Kimberly Member (sample A2 1419-1424)
EK65DB22; J = 0.0020703 ± 0.00000039
90639-73A		Plagioclase	1.32232	0.0159215	0.560477	0.0026503	0.0076917	0.0005072	3.54e-05	0.000148	0.0002999	0.0001071	0.0331972	2.19597	0.0652552	93.2915	8.2015	0.243164	0.243663	1
90639-72A		Plagioclase	1.29766	0.0153448	0.530315	0.0025459	0.0068821	0.0004811	0.0003806	0.00012	0.0004277	0.0001006	0.376543	2.21659	0.0651169	90.7811	8.27834	0.242638	0.243148	2
90639-71A		Plagioclase	1.1343	0.0148448	0.414723	0.0022493	0.0049041	0.0004604	0.0004944	0.00012	0.0007185	9.87e-05	0.625004	2.23833	0.0813203	82.0047	8.35937	0.303001	0.303418	3
90639-70A		Plagioclase	1.13484	0.0145159	0.498713	0.00264	0.0061822	0.0004602	0.0002367	0.0001575	0.000146	9.59e-05	0.248729	2.19328	0.0661295	96.6003	8.19148	0.246423	0.246914	4
90639-69A		Plagioclase	1.74398	0.0147164	0.780144	0.003428	0.0100701	0.0004354	-2.99e-05	0.0001109	9.93e-05	9.18e-05	-0.0200471	2.19159	0.0414713	98.2658	8.18518	0.154538	0.155319	5
90639-68A		Plagioclase	0.999976	0.0133749	0.407788	0.0017542	0.0067974	0.0004382	0.0001682	0.0001292	0.0004364	9.16e-05	0.215788	2.13715	0.0759474	87.3458	7.98233	0.28304	0.283447	6
90639-67A		Plagioclase	1.62592	0.0138679	0.689044	0.0021434	0.01134	0.0004429	0.0005115	0.0001047	0.0004654	9.07e-05	0.388098	2.16954	0.0451337	92.1411	8.10301	0.168193	0.168897	7
90639-66A		Plagioclase	0.536288	0.0133078	0.165169	0.0009067	0.0055204	0.0004684	0.0007497	0.000148	0.0005527	9.05e-05	2.37183	2.34314	0.184649	72.2647	8.74983	0.687858	0.688059	8
90639-65A		Plagioclase	1.27804	0.0131671	0.504309	0.0020445	0.008106	0.0004174	9.98e-05	0.000148	0.0005547	8.99e-05	0.103293	2.20546	0.0606627	87.2215	8.23686	0.226046	0.226588	9
90639-64A		Plagioclase	1.9342	0.0145696	0.786002	0.0031288	0.0168521	0.0004994	0.0007566	0.0001386	0.0006457	9.01e-05	0.502257	2.23233	0.0404803	90.9072	8.33701	0.150832	0.151663	10
90639-63A		Plagioclase	2.80249	0.0149994	1.14728	0.0029307	0.0199542	0.0004658	0.0006449	0.00012	0.0008885	8.98e-05	0.293155	2.21915	0.0278561	91.0456	8.28788	0.103796	0.104985	11
90639-62A		Plagioclase	1.12878	0.0132062	0.470956	0.0023388	0.0073504	0.0004272	0.0002103	9.5e-05	0.0004534	8.92e-05	0.232525	2.1144	0.0644559	88.4136	7.89752	0.240226	0.240694	12
90639-61A		Plagioclase	1.65007	0.0138783	0.656241	0.0029309	0.0103856	0.0004276	0.0002265	0.0001292	0.0008609	9.01e-05	0.179622	2.12562	0.047622	84.7246	7.93934	0.177482	0.178122	13
90639-60A		Plagioclase	1.62179	0.0142606	0.701405	0.0033273	0.009284	0.0004316	-3.17e-05	0.0001091	0.0003959	8.9e-05	-0.0234936	2.13781	0.0445709	92.6724	7.98479	0.166106	0.166799	14
90639-59A		Plagioclase	0.427238	0.0030017	0.167458	0.0004807	0.0025824	5.95e-05	1.39e-05	2.9e-05	0.000233	1.29e-05	0.0389779	2.13304	0.0301437	83.7919	7.96699	0.11234	0.113357	15
90639-58A		Plagioclase	0.553223	0.0031623	0.225697	0.0008704	0.0029279	4.83e-05	4.43e-05	2.97e-05	0.0002119	1.28e-05	0.0917115	2.16976	0.0237781	88.7158	8.10386	0.0886102	0.0899396	16
90639-57A		Plagioclase	0.318914	0.0028231	0.128509	0.0003908	0.0020377	5.33e-05	4.27e-05	3.12e-05	0.0001612	1.26e-05	0.155157	2.109	0.0376247	85.1707	7.87742	0.140228	0.141025	17
90639-56A		Plagioclase	0.411534	0.0032202	0.161818	0.0004407	0.0029733	6.76e-05	3.75e-05	3.05e-05	0.0001849	1.29e-05	0.108385	2.20218	0.0319032	86.782	8.22466	0.118881	0.119905	18
90639-55A		Plagioclase	0.297898	0.0010143	0.118082	0.0003405	0.0019074	5.19e-05	5.72e-05	2.91e-05	0.0001547	1.15e-05	0.226169	2.13661	0.0313708	84.8751	7.98032	0.116913	0.117893	19
90639-54A		Plagioclase	0.294064	0.001212	0.121899	0.0004304	0.0018766	5.61e-05	8.08e-05	3.14e-05	9.73e-05	1.09e-05	0.309277	2.1823	0.0299364	90.6574	8.15058	0.111557	0.112628	20
90639-53A		Plagioclase	0.886881	0.0026056	0.391705	0.0009602	0.005069	6.31e-05	-1.25e-05	2.98e-05	0.0001188	1.15e-05	-0.0149386	2.16807	0.0123862	95.9746	8.09755	0.0461579	0.0486575	21
90639-52A		Plagioclase	0.211489	0.0010002	0.090733	0.0004604	0.0013107	4.78e-05	2.03e-05	3.19e-05	8.55e-05	1.11e-05	0.104088	2.04936	0.0402131	88.118	7.65512	0.149893	0.150598	22
90639-51A		Plagioclase	0.296334	0.0013153	0.125973	0.0003905	0.0019592	5.52e-05	2.48e-05	3.19e-05	0.0001114	1.08e-05	0.0916305	2.08766	0.0287376	88.946	7.79789	0.10711	0.108132	23
90639-50A		Plagioclase	0.356511	0.0013153	0.149543	0.0004005	0.0022273	4.7e-05	8.96e-05	3.39e-05	0.0001007	1.08e-05	0.278944	2.18974	0.0243548	92.0499	8.17832	0.0907558	0.092078	24
90639-49A		Plagioclase	0.354898	0.0017117	0.160578	0.0007003	0.002024	4.86e-05	9.93e-05	3.12e-05	7.22e-05	1.01e-05	0.287573	2.083	0.0238198	94.4533	7.78049	0.0887815	0.0900055	25
90639-48A		Plagioclase	0.801226	0.0015048	0.343035	0.0009301	0.0047949	5.64e-05	5.58e-05	3.18e-05	0.0002472	1.01e-05	0.0756118	2.11898	0.0115911	90.9247	7.91461	0.0431994	0.0457453	26
90639-47A		Plagioclase	0.38463	0.0015048	0.161427	0.0006102	0.0022156	4.58e-05	7.6e-05	3.48e-05	0.000128	9.99049e-06	0.218666	2.15016	0.0226739	90.438	8.0308	0.0844987	0.0858671	27
90639-46A		Plagioclase	0.350787	0.0013055	0.149606	0.0005402	0.0020961	4.66e-05	0.0001149	3.11e-05	0.0001449	1.08e-05	0.35672	2.06571	0.0248477	88.2876	7.71605	0.0926161	0.093771	28
90639-45A		Plagioclase	0.0958092	0.0006325	0.0283648	0.0001708	0.0004428	3.91e-05	2.86e-05	3.75e-05	5.64e-05	1e-05	0.467723	2.79726	0.112209	82.9803	10.4408	0.417614	0.418085	29
90639-44A		Plagioclase	0.370328	0.0018111	0.162834	0.0007502	0.0018711	5.19e-05	5.55e-05	3.75e-05	6.2e-05	1.02e-05	0.15802	2.16208	0.02441	95.2779	8.07524	0.0909664	0.0922529	30
90639-43A		Plagioclase	0.350404	0.0015133	0.155626	0.0007002	0.001977	4.67e-05	-3.72e-05	3.5e-05	7.84e-05	1.02e-05	-0.110874	2.09178	0.0242269	93.1184	7.81324	0.0902972	0.091511	31
90639-42A		Plagioclase	0.305088	0.0014142	0.134939	0.0006502	0.0016526	5.34e-05	-6.82446e-06	3.5e-05	8.93e-05	9.82904e-06	-0.0234272	2.0577	0.0266281	91.2189	7.68621	0.0992538	0.100324	32
90639-41A		Plagioclase	0.365912	0.0019127	0.158366	0.0006902	0.0019491	5.27e-05	7.59e-05	2.97e-05	7.17e-05	1.03e-05	0.221731	2.17942	0.0251587	94.5313	8.13985	0.0937534	0.095022	33
90639-40A		Plagioclase	0.202828	0.0011218	0.0736004	0.0003104	0.0010518	5.02e-05	0.0001271	3.04e-05	8.56e-05	1.06e-05	0.798599	2.43631	0.0472934	88.5774	9.09689	0.176144	0.176991	34
90639-39A		Plagioclase	0.258423	0.0010239	0.110354	0.0004503	0.001385	4.78e-05	-2.15e-05	3.11e-05	7.14e-05	1.04e-05	-0.089993	2.14002	0.0313841	91.5946	7.99303	0.116961	0.117944	35
90639-38A		Plagioclase	0.893424	0.0021061	0.379018	0.0011001	0.0061436	8.29e-05	-7.96e-05	3.11e-05	0.0003224	1.05e-05	-0.0969722	2.09497	0.0118281	89.0791	7.82512	0.0440848	0.0465277	36
Kimberly Member (sample A2 1945-1953)
EK65DB21; J = 0.0020685 ± 0.00000039
90637-69A		Plagioclase	0.33527	0.0121495	0.125934	0.0005515	0.0018151	0.0001537	-0.0001798	0.0003197	0.0002361	6.39e-05	-0.686599	2.06969	0.186339	77.9347	7.72419	0.693944	0.694096	1
90637-68A		Plagioclase	0.37159	0.0121198	0.11459	0.0004966	0.0016117	0.0001559	0.000239	0.0003401	0.0004337	6.39e-05	1.00251	2.14929	0.205729	66.4008	8.0206	0.766026	0.766174	2
90637-67A		Plagioclase	0.18444	0.0121062	0.053495	0.000297	0.0008425	0.0001622	0.000178	0.0003401	0.0002776	6.32e-05	1.59713	1.95996	0.437246	56.938	7.31548	1.62871	1.62877	3
90637-66A		Plagioclase	0.74171	0.0123223	0.323557	0.0012182	0.00427	0.0001769	0.00031	0.0003289	0.0002165	6.32e-05	0.459651	2.10676	0.0728339	92.0981	7.86222	0.271219	0.271621	4
90637-65A		Plagioclase	0.49876	0.0122577	0.093689	0.0003996	0.0014031	0.0001501	-0.000171	0.0003401	0.0009724	6.54e-05	-0.875202	2.1838	0.255907	41.1203	8.14911	0.952796	0.952919	5
90637-64A		Plagioclase	0.113053	0.0024519	0.0477262	0.0001702	0.000641	6.22e-05	1.87e-05	4.63e-05	3.68e-05	2.22e-05	0.137444	2.13979	0.149292	90.5236	7.98523	0.555898	0.5561	6
90637-63A		Plagioclase	0.234188	0.002581	0.0961221	0.0002403	0.0012097	6.32e-05	4.17668e-06	4.63e-05	8.36e-05	2.22e-05	0.0152707	2.17254	0.0747371	89.3631	8.10717	0.278269	0.278685	7
90637-62A		Plagioclase	0.0728846	0.0024417	0.0239185	0.00012	0.0003616	6.42e-05	8.24e-05	4.49e-05	9e-05	2.22e-05	1.20974	1.96931	0.297141	64.7342	7.35033	1.10681	1.1069	8
90637-61A		Plagioclase	0.151507	0.0024729	0.0415448	0.000162	0.0006314	6.32e-05	8.57e-05	4.49e-05	0.0001544	2.26e-05	0.724486	2.56172	0.174369	70.3713	9.55564	0.648707	0.648955	9
90637-60A		Plagioclase	0.182927	0.0025087	0.0783916	0.0001702	0.0009366	6.17e-05	8e-05	4.84e-05	2.55e-05	2.26e-05	0.357747	2.24636	0.0924583	96.462	8.382	0.344198	0.344557	10
90637-59A		Plagioclase	0.273361	0.0025843	0.110984	0.0003152	0.0014026	5.96e-05	4.36e-05	4.59e-05	0.0001372	2.25e-05	0.13752	2.09503	0.0655368	85.2366	7.81855	0.244052	0.244494	11
90637-58A		Plagioclase	0.294616	0.0025615	0.126574	0.0002403	0.0015113	7.17e-05	4.01e-05	4.96e-05	8.18e-05	2.23e-05	0.110843	2.13438	0.0570269	91.8933	7.96509	0.212345	0.212871	12
90637-57A		Plagioclase	0.315369	0.0028074	0.136027	0.0005289	0.0017501	6.92e-05	5.04e-05	4.45e-05	9.89e-05	2.22e-05	0.129607	2.10217	0.0539613	90.8646	7.84515	0.200943	0.201483	13
90637-56A		Plagioclase	0.476426	0.0032142	0.166767	0.0006769	0.0025183	7.43e-05	0.000107	4.68e-05	0.0004181	2.3e-05	0.22422	2.1132	0.0466836	74.12	7.88623	0.173839	0.174468	14
90637-55A		Plagioclase	0.0588648	0.0024746	0.0095286	0.0001075	0.0005885	6.17e-05	1.61e-05	4.68e-05	0.0001889	2.27e-05	0.591502	0.287888	0.762357	4.66831	1.07639	2.84954	2.84954	15
90637-54A		Plagioclase	0.643415	0.0034178	0.234195	0.0007661	0.0032215	8.14e-05	5.7e-05	4.68e-05	0.0004928	2.32e-05	0.0849311	2.1181	0.0340023	77.257	7.90445	0.126615	0.127482	16
90637-53A		Plagioclase	0.165521	0.0024842	0.0702747	0.000162	0.000836	6.47e-05	5.75e-05	4.68e-05	3.7e-05	2.2e-05	0.285524	2.20518	0.100922	93.8177	8.22871	0.375738	0.376056	17
90637-52A		Plagioclase	0.154505	0.0025135	0.0680069	0.0001785	0.0008801	6.42e-05	-8.91482e-06	5.02e-05	1.44e-05	2.21e-05	-0.0456974	2.20218	0.104788	97.1429	8.21752	0.390133	0.390438	18
90637-51A		Plagioclase	0.397496	0.0029122	0.0276947	0.0001465	0.0004783	6.32e-05	1.39e-05	4.54e-05	0.0002909	2.28e-05	0.174724	11.203	0.275777	78.1977	41.4214	1.00806	1.011	19
90637-50A		Plagioclase	0.144028	0.0024583	0.0616144	0.0001541	0.0007195	6e-05	8.27003e-06	4.63e-05	4.58e-05	2.22e-05	0.0467349	2.11262	0.115776	90.5709	7.88405	0.431121	0.431375	20
90637-49A		Plagioclase	0.181141	0.002511	0.0723743	0.000162	0.000947	6.63e-05	5.3e-05	4.79e-05	0.0001021	2.25e-05	0.254949	2.08758	0.0998196	83.5797	7.79083	0.371723	0.372011	21
90637-48A		Plagioclase	0.0705593	0.0024555	0.0288152	0.0001391	0.0003345	6.04e-05	9.79177e-06	4.63e-05	3.36e-05	2.24e-05	0.118095	2.10093	0.248787	85.9788	7.84051	0.926446	0.926562	22
90637-47A		Plagioclase	0.396461	0.0030267	0.168422	0.0006176	0.0020238	6.8e-05	4.63e-05	4.54e-05	0.0001002	2.25e-05	0.0954527	2.17553	0.0448082	92.6157	8.1183	0.166833	0.167528	23
90637-46A		Plagioclase	0.124809	0.0024659	0.0273441	0.0001288	0.0003516	6.22e-05	4.9e-05	4.63e-05	7.86e-05	2.23e-05	0.622426	3.72473	0.262425	81.75	13.8772	0.973975	0.974323	24
90637-45A		Plagioclase	0.207952	0.0027587	0.0846406	0.0004115	0.001196	6.52e-05	5.19e-05	4.63e-05	0.0001147	2.26e-05	0.212636	2.05662	0.0873118	83.8817	7.67551	0.325166	0.325485	25
90637-44A		Plagioclase	0.245295	0.0026703	0.0776036	0.0003057	0.0010655	6.74e-05	-5.17756e-06	4.68e-05	0.0002464	2.28e-05	-0.0231239	2.2073	0.0951072	69.9776	8.23659	0.354087	0.354425	26
90637-43A		Plagioclase	0.162323	0.0025462	0.0663456	0.0002774	0.0008897	6.32e-05	2.58e-05	4.54e-05	7.2e-05	2.27e-05	0.134586	2.12343	0.11005	86.972	7.92431	0.409792	0.410062	27
90637-42A		Plagioclase	0.019455	0.0024398	0.0036869	0.000101	7.29e-05	5.93e-05	-2.54e-05	4.45e-05	8.5972e-06	2.2e-05	-2.38228	4.47241	1.91569	84.9957	16.6501	7.09908	7.09915	28
90637-41A		Plagioclase	0.0629761	0.0024414	0.0251999	0.0001242	0.0003583	6.27e-05	2.97e-05	4.74e-05	3.74e-05	2.22e-05	0.407197	2.06869	0.282764	82.944	7.72048	1.05304	1.05314	29
90637-40A		Plagioclase	0.697696	0.0032803	0.153749	0.0004505	0.0020432	6.86e-05	7.86e-05	4.68e-05	0.0012989	2.37e-05	0.176605	2.01831	0.051636	44.5633	7.53283	0.192318	0.192837	30
90637-39A		Plagioclase	0.264103	0.0025211	0.102218	0.0002132	0.0013424	6.47e-05	6.3e-05	4.58e-05	0.0001661	2.26e-05	0.212828	2.10267	0.0710517	81.5486	7.847	0.264585	0.264995	31
90637-38A		Plagioclase	0.33524	0.0026703	0.105786	0.0003152	0.0013151	6.86e-05	9.76e-05	4.68e-05	0.0002835	2.25e-05	0.318318	2.37685	0.0691792	75.1494	8.86772	0.257466	0.258004	32
90637-37A		Plagioclase	0.295403	0.0025708	0.128677	0.0002868	0.0016283	7.11e-05	3.86e-05	4.68e-05	6.66e-05	2.26e-05	0.103372	2.14081	0.0567669	93.4515	7.98901	0.211374	0.211906	33
90637-36A		Plagioclase	0.0273595	0.0024391	0.0051633	0.0001035	0.0001502	6.42e-05	0.0001064	4.58e-05	7.68e-05	2.23e-05	7.10196	1.1489	1.38743	21.6704	4.29182	5.17673	5.17674	34
90637-35A		Plagioclase	0.160701	0.002584	0.048931	0.0002681	0.0009848	6.92e-05	0.0002059	4.63e-05	0.000171	2.24e-05	1.44865	2.29655	0.148193	70.0351	8.56885	0.551627	0.551862	35
90637-34A		Plagioclase	0.320335	0.0027587	0.109366	0.0004115	0.0014116	7.11e-05	8.89e-05	4.74e-05	0.0001671	2.23e-05	0.279859	2.4791	0.067179	84.8077	9.24821	0.24997	0.250572	36
90637-33A		Plagioclase	0.206733	0.0025109	0.0901045	0.0002132	0.001203	6.63e-05	1.19e-05	4.68e-05	3.4e-05	2.25e-05	0.0453968	2.17878	0.0802236	95.1663	8.13042	0.298693	0.299083	37
Castleford Crossing Member (sample A2 2102-2106)
EK65DB20; J = 0.0020658 ± 0.00000027
90631-69A		Plagioclase	0.122294	0.0120408	0.048934	0.0003189	0.0004742	0.0001581	0.000329	0.0003444	6.39e-05	6.32e-05	3.22069	2.2366	0.478172	89.5935	8.3348	1.77783	1.77786	1
90631-68A		Plagioclase	0.09807	0.0120503	0.038095	0.000264	0.000639	0.0001581	0.0002224	0.0003214	5.28e-05	6.32e-05	2.79516	2.27124	0.610818	88.3365	8.4636	2.27084	2.27087	2
90631-67A		Plagioclase	0.0956	0.0120599	0.041089	0.0002702	0.0002255	0.0001476	0.0005224	0.0003257	-1.98e-05	6.29e-05	6.0841	2.7155	0.566081	116.726	10.1145	2.1026	2.10264	3
90631-66A		Plagioclase	0.15942	0.0120599	0.065904	0.0003189	0.0007428	0.0001436	0.000477	0.0003401	0.0001345	6.32e-05	3.46182	1.94732	0.354701	80.5854	7.25896	1.31955	1.31959	4
90631-65A		Plagioclase	0.25584	0.0120934	0.063094	0.0003265	0.0009834	0.0001553	-8e-05	0.0003362	0.0003596	6.36e-05	-0.605821	2.32328	0.371245	57.4307	8.65705	1.38003	1.38008	5
90631-64A		Plagioclase	0.112765	0.0024555	0.0299304	0.0001249	0.000365	6.13e-05	8.74e-05	4.54e-05	0.000161	2.24e-05	1.00307	2.19809	0.239518	58.4403	8.19161	0.890593	0.890658	6
90631-63A		Plagioclase	0.0428382	0.0024391	0.015689	0.0001128	0.0001811	6.22e-05	4.07e-05	4.49e-05	4.32e-05	2.23e-05	0.890081	1.94036	0.455078	71.1914	7.23307	1.693	1.69303	7
90631-62A		Plagioclase	0.0775485	0.0024378	0.0299525	0.0001294	0.0003607	6.32e-05	1.74e-05	4.68e-05	5.2e-05	2.22e-05	0.199617	2.07466	0.237499	80.2968	7.7326	0.883309	0.883367	8
90631-61A		Plagioclase	0.0585407	0.0024414	0.0211639	0.0001154	0.0001701	6.09e-05	0.0001078	4.45e-05	4.28e-05	2.26e-05	1.74694	2.22886	0.34133	80.6984	8.30601	1.26907	1.26912	9
90631-60A		Plagioclase	0.0216703	0.0024385	0.0069838	0.000105	0.0001705	6e-05	2.24e-05	4.58e-05	2.5e-05	2.22e-05	1.10016	2.07791	1.01716	67.0789	7.7447	3.78301	3.78303	10
90631-59A		Plagioclase	0.0404959	0.0024415	0.0174215	0.0001149	0.0001646	6.17e-05	5.69e-05	4.9e-05	6.70215e-07	2.24e-05	1.11815	2.35371	0.412571	101.436	8.77015	1.53356	1.5336	11
90631-58A		Plagioclase	0.009592	0.0024379	0.0036422	0.000101	7.79e-05	6.09e-05	-6.1e-05	4.58e-05	1.44735e-06	2.22e-05	-5.73525	2.27458	1.94571	86.7275	8.47602	7.23355	7.23355	12
90631-57A		Plagioclase	0.0322814	0.0024399	0.0124365	0.0001062	0.0002245	6.13e-05	4.25543e-06	4.63e-05	2.71e-05	2.25e-05	0.117005	1.94583	0.57884	75.1196	7.25339	2.1534	2.15342	13
90631-56A		Plagioclase	0.0425766	0.0024432	0.0166543	0.0001103	0.0001664	5.96e-05	0.000123	4.63e-05	7.95015e-06	2.22e-05	2.52189	2.51255	0.427582	98.4018	9.36047	1.58884	1.58888	14
90631-55A		Plagioclase	0.01996	0.00244	0.0057964	0.0001039	7.99e-05	6.13e-05	7.48e-05	4.74e-05	3.22e-05	2.24e-05	4.40758	1.96379	1.23711	57.0563	7.32022	4.60213	4.60214	15
90631-54A		Plagioclase	0.0616245	0.0024472	0.021042	0.0001274	0.0003827	5.93e-05	3.41e-05	4.74e-05	7.62e-05	2.24e-05	0.552079	1.86633	0.340502	63.8474	6.95761	1.26694	1.26697	16
90631-53A		Plagioclase	0.0506801	0.002457	0.0220802	0.0001182	0.0002472	5.96e-05	8.4e-05	4.68e-05	3.14e-05	2.21e-05	1.29771	1.91912	0.321701	83.754	7.15402	1.19686	1.19689	17
90631-52A		Plagioclase	0.0732381	0.002457	0.0248708	0.0001702	0.0006267	6.22e-05	2.86e-05	4.63e-05	8.78e-05	2.22e-05	0.391223	1.90371	0.286762	64.7738	7.0967	1.0669	1.06695	18
90631-51A		Plagioclase	0.0945911	0.0024843	0.0346611	0.000187	0.0005238	5.96e-05	9.17e-05	4.54e-05	8.96e-05	2.23e-05	0.900909	1.99014	0.20695	73.0555	7.41825	0.769825	0.769887	19
90631-50A		Plagioclase	0.0723181	0.0024729	0.0245141	0.0001541	0.0005289	6.47e-05	8.19e-05	4.68e-05	9.12e-05	2.24e-05	1.13642	1.88306	0.292772	63.939	7.01988	1.08931	1.08935	20
90631-49A		Plagioclase	0.0474791	0.0024394	0.011514	0.0001071	0.0001494	6.09e-05	5.51e-05	4.54e-05	6.65e-05	2.21e-05	1.62704	2.46174	0.614873	59.7846	9.17167	2.28502	2.28505	21
90631-48A		Plagioclase	0.0432242	0.0024409	0.0179046	0.0001118	0.0003385	6.47e-05	1.14e-05	4.74e-05	1.56938e-06	2.22e-05	0.216768	2.39262	0.397398	99.3137	8.9148	1.47704	1.47708	22
90631-47A		Plagioclase	0.0337842	0.0024382	0.0055319	0.0001022	0.0001234	5.93e-05	4.34e-05	4.68e-05	3.19e-05	2.19e-05	2.66129	4.48841	1.27491	73.5682	16.6876	4.71822	4.71827	23
90631-46A		Plagioclase	0.0153441	0.0024376	0.0039484	0.0001022	8.37e-05	6e-05	-0.0001005	4.54e-05	5.57613e-06	2.22e-05	-8.63015	3.10067	1.79846	80.1935	11.5445	6.67477	6.67479	24
90631-45A		Plagioclase	0.0647064	0.0024546	0.0235312	0.000162	0.0004085	6.13e-05	3.95e-05	4.59e-05	7.79e-05	2.22e-05	0.568616	1.78178	0.302577	64.9198	6.64302	1.12603	1.12606	25
90631-44A		Plagioclase	0.0510105	0.0024419	0.0177076	0.0001138	0.0002596	6.17e-05	-3.89074e-07	4.96e-05	6.48e-05	2.24e-05	-0.0074421	1.78417	0.404532	62.0647	6.6519	1.50544	1.50547	26
90631-43A		Plagioclase	0.0189555	0.002439	0.0050638	0.0001039	9.37e-05	6.13e-05	7.01e-05	4.68e-05	2.7e-05	2.23e-05	4.68725	2.34261	1.41249	62.6043	8.7289	5.25045	5.25046	27
90631-42A		Plagioclase	0.101642	0.0024428	0.0377064	0.0001465	0.0004597	6.63e-05	0.000134	4.63e-05	7.19e-05	2.22e-05	1.20225	2.17103	0.188576	80.6749	8.09098	0.701215	0.701295	28
90631-41A		Plagioclase	0.0583701	0.0024428	0.0229129	0.0001171	0.0003408	6e-05	6.83e-05	4.45e-05	1.83e-05	2.22e-05	1.00821	2.34636	0.310515	92.2682	8.74284	1.15422	1.15428	29
90631-40A		Plagioclase	0.0506484	0.0024398	0.0190803	0.0001275	0.0003057	6.32e-05	1.80514e-07	4.54e-05	5.8e-05	2.23e-05	0.0031946	1.74358	0.373628	65.8232	6.50085	1.39055	1.39057	30
90631-39A		Plagioclase	0.0436867	0.0024392	0.0121776	0.000108	0.0001304	6.04e-05	1.6e-05	4.54e-05	4.49e-05	2.21e-05	0.443423	2.49954	0.581884	69.8053	9.31213	2.16226	2.1623	31
90631-38A		Plagioclase	0.0519839	0.002443	0.0219239	0.0001182	0.0002529	6.09e-05	7.81e-05	4.68e-05	4.42708e-06	2.23e-05	1.20071	2.35521	0.325549	99.5006	8.77574	1.21009	1.21014	32
90631-37A		Plagioclase	0.021159	0.0024393	0.0083147	0.0001047	4.4e-05	6.13e-05	5.88e-05	4.68e-05	2.52517e-06	2.22e-05	2.38489	2.54639	0.857417	100.191	9.48622	3.18582	3.18585	33
90631-36A		Plagioclase	0.0424384	0.0024431	0.0134514	0.000116	0.0001944	6e-05	2.38e-05	4.54e-05	4.11e-05	2.22e-05	0.595744	2.26208	0.529616	71.8326	8.42953	1.96899	1.96903	34
90631-35A		Plagioclase	0.0326892	0.0024401	0.0113828	0.0001118	0.0002192	6e-05	4.18e-05	4.45e-05	4.93e-05	2.22e-05	1.2367	1.62522	0.62556	56.6858	6.06027	2.32874	2.32876	35
90631-34A		Plagioclase	0.0804574	0.0024441	0.0306299	0.0001342	0.0004091	6.32e-05	5.02e-05	4.54e-05	6.07e-05	2.22e-05	0.551255	2.0537	0.232618	78.3338	7.65465	0.865193	0.865251	36
90631-33A		Plagioclase	0.039279	0.0024425	0.0146811	0.0001128	0.0001433	6.05e-05	7.31e-05	4.63e-05	2.6e-05	2.25e-05	1.67277	2.21098	0.490824	82.7638	8.23953	1.82497	1.825	37
Castleford Crossing Member (sample MBH-12.2-013)
EK65DB24; J = 0.0020722 ± 0.00000064
90643-70A		Plagioclase	0.0907314	0.0024504	0.0248962	0.0001328	0.0003912	6.27e-05	9.55e-05	4.64e-05	0.0001214	2.22e-05	1.3859	2.24116	0.286338	61.5926	8.37756	1.06787	1.06818	1
90643-69A		Plagioclase	0.714108	0.003215	0.0173221	0.0001128	0.0002703	6.01e-05	4.91e-05	4.45e-05	0.0004993	2.3e-05	1.02243	32.6116	0.492733	79.2258	118.235	1.72927	1.76471	2
90643-68A		Plagioclase	0.0516915	0.0024452	0.020296	0.0001236	0.0003383	5.89e-05	5.75e-05	4.54e-05	4.06e-05	2.23e-05	1.02187	1.98731	0.351815	78.1683	7.4306	1.31275	1.31294	3
90643-67A		Plagioclase	0.0852532	0.0024471	0.0312747	0.0001391	0.0005177	6.37e-05	0.0001196	4.64e-05	6.64e-05	2.24e-05	1.37869	2.1443	0.229405	78.7913	8.01629	0.855713	0.856066	4
90643-66A		Plagioclase	0.0684564	0.0024492	0.0167692	0.0001268	0.0003504	6e-05	9.89e-05	4.79e-05	0.0001199	2.22e-05	2.12507	2.03096	0.425196	49.8145	7.59347	1.58642	1.58659	5
90643-65A		Plagioclase	0.297743	0.0027597	0.0582393	0.0003057	0.0009344	6.42e-05	0.0001412	4.54e-05	0.0002813	2.26e-05	0.872122	3.69926	0.127544	72.481	13.8072	0.474235	0.476117	6
90643-64A		Plagioclase	0.175014	0.0026059	0.0331948	0.0002044	0.0007306	6.05e-05	0.0001195	4.69e-05	0.000177	2.24e-05	1.29518	3.72785	0.218749	70.8144	13.9135	0.81331	0.814426	7
90643-63A		Plagioclase	0.118676	0.0024552	0.0180364	0.0001183	0.0002787	5.89e-05	0.0001126	4.59e-05	6.55e-05	2.22e-05	2.24267	5.57968	0.397401	84.8998	20.7856	1.47193	1.4733	8
90643-62A		Plagioclase	0.101577	0.0025047	0.0329291	0.0001956	0.0005491	6.32e-05	6.36e-05	4.54e-05	0.0001196	2.23e-05	0.69412	2.02465	0.217977	65.7562	7.56994	0.813286	0.813617	9
90643-61A		Plagioclase	0.0158812	0.0024382	0.0051095	0.0001022	0.0001098	6.05e-05	-2.54789e-06	4.45e-05	1.34e-05	2.22e-05	-0.178938	2.31476	1.39413	74.6342	8.65204	5.1985	5.19857	10
90643-60A		Plagioclase	0.199276	0.0024933	0.0233637	0.0001133	0.0002823	6.22e-05	0.0001471	4.74e-05	0.0003681	2.27e-05	2.25797	3.91174	0.31236	45.9148	14.5971	1.16091	1.16178	11
90643-59A		Plagioclase	0.0672313	0.0024424	0.0123692	0.000108	0.0002061	6.42e-05	-1.07e-05	4.59e-05	5.89e-05	2.24e-05	-0.310189	3.99346	0.579291	73.626	14.9008	2.15263	2.15311	12
90643-58A		Plagioclase	0.0776202	0.0024415	0.0262334	0.0001255	0.0003553	6.05e-05	0.0001012	4.63e-05	9.43e-05	2.25e-05	1.38149	1.938	0.274431	65.6045	7.2466	1.02411	1.02435	13
90643-57A		Plagioclase	0.0710162	0.002455	0.0137395	0.0001243	0.0003875	6.09e-05	3.73e-05	4.59e-05	0.0001355	2.23e-05	0.97207	2.26048	0.520049	43.8058	8.44961	1.93939	1.93957	14
90643-56A		Plagioclase	0.112984	0.0025355	0.0356191	0.0002222	0.0006484	6.09e-05	0.0001342	4.59e-05	0.0001085	2.24e-05	1.34711	2.31358	0.202647	73.0551	8.64762	0.75564	0.756105	15
90643-55A		Plagioclase	0.173692	0.0026315	0.0307104	0.000187	0.0004575	6.69e-05	0.0001117	4.54e-05	0.0002188	2.23e-05	1.29939	3.57524	0.236048	63.3099	13.3461	0.877903	0.878855	16
90643-54A		Plagioclase	0.320792	0.0029689	0.0595466	0.0003247	0.0010328	6.58e-05	0.0002201	4.63e-05	0.0003698	2.28e-05	1.32028	3.58138	0.127333	66.5803	13.3689	0.473566	0.475334	17
90643-53A		Plagioclase	0.0953943	0.0024828	0.0337114	0.0001702	0.0004597	6.22e-05	8.87e-05	4.63e-05	8.27e-05	2.25e-05	0.93925	2.13151	0.21441	75.46	7.96861	0.7998	0.800174	18
90643-52A		Plagioclase	0.21526	0.0025529	0.0446711	0.0001465	0.0006626	6.27e-05	0.0002052	4.54e-05	0.0001448	2.24e-05	1.63736	3.9115	0.16186	81.2879	14.5962	0.601571	0.603229	19
90643-51A		Plagioclase	0.0523699	0.0024489	0.0172043	0.0001165	0.0003665	6.32e-05	3.96e-05	4.54e-05	5.14e-05	2.23e-05	0.819812	2.18238	0.415567	71.8238	8.15834	1.55001	1.55021	20
90643-50A		Plagioclase	0.29487	0.002859	0.0314246	0.0001785	0.0005575	6.32e-05	0.0001456	4.74e-05	0.0002055	2.26e-05	1.65007	7.48773	0.239564	79.9051	27.839	0.883867	0.887939	21
90643-49A		Plagioclase	0.206852	0.0026709	0.0443807	0.0001956	0.0007378	6.63e-05	0.0001725	4.49e-05	0.0002655	2.23e-05	1.38264	2.92638	0.163472	62.8817	10.9312	0.608793	0.609714	22
90643-48A		Plagioclase	0.198818	0.0026709	0.0287129	0.000187	0.0005047	6.17e-05	8.37e-05	4.74e-05	0.0002826	2.25e-05	1.03637	4.02133	0.255067	58.1677	15.0044	0.947766	0.948879	23
90643-47A		Plagioclase	0.166304	0.0025528	0.0456792	0.0001956	0.0006821	6.27e-05	0.0001372	4.63e-05	0.0001825	2.24e-05	1.06664	2.48666	0.158323	68.4163	9.29292	0.590152	0.59084	24
90643-46A		Plagioclase	0.0654421	0.0024477	0.0175472	0.0001236	0.000298	6.32e-05	-4.47e-05	4.59e-05	0.0001084	2.21e-05	-0.903781	1.84482	0.404482	49.5832	6.89887	1.50971	1.50986	25
90643-45A		Plagioclase	0.032609	0.0024373	0.0057996	0.0001047	0.0002522	6.17e-05	1.76e-05	4.63e-05	8.5e-05	2.22e-05	1.07657	1.29117	1.22514	23.0006	4.83119	4.57802	4.57805	26
90643-44A		Plagioclase	0.0641491	0.0024446	0.0229721	0.0001212	0.0003295	6.17e-05	0.0001053	4.63e-05	5.47e-05	2.22e-05	1.62478	2.14416	0.310053	76.9017	8.01578	1.15654	1.1568	27
90643-43A		Plagioclase	0.090639	0.0024846	0.0310815	0.000162	0.0004895	6.13e-05	5.05e-05	4.63e-05	9.88e-05	2.24e-05	0.576016	1.98655	0.231473	68.2513	7.42777	0.863711	0.864012	28
90643-42A		Plagioclase	0.0652395	0.0024437	0.0248409	0.0001294	0.00038	6.13e-05	0.0001294	4.59e-05	3.02e-05	2.21e-05	1.84373	2.33466	0.285324	89.0267	8.72621	1.06388	1.06422	29
90643-41A		Plagioclase	0.128723	0.0024973	0.0421732	0.0002043	0.0006328	6.63e-05	0.000113	4.59e-05	0.0001458	2.25e-05	0.947848	2.0546	0.171076	67.4325	7.68168	0.638256	0.638691	30
90643-40A		Plagioclase	0.0918167	0.0024664	0.031277	0.000162	0.0005088	6.22e-05	4.21e-05	4.49e-05	9.46e-05	2.25e-05	0.476333	2.04851	0.230389	69.9167	7.65895	0.859556	0.859877	31
90643-39A		Plagioclase	0.244595	0.0028076	0.0226259	0.0001541	0.0005132	6.37e-05	8.88e-05	4.68e-05	0.0002331	2.25e-05	1.38692	7.78008	0.328855	72.0713	28.9173	1.21258	1.21578	32
90643-38A		Plagioclase	0.318536	0.0029125	0.0469003	0.0002222	0.000801	6.42e-05	0.0002012	4.54e-05	0.0001905	2.26e-05	1.51462	5.63267	0.160539	83.0517	20.9818	0.594555	0.598004	33
90643-37A		Plagioclase	0.126304	0.0025215	0.0351203	0.0002132	0.0006254	6.09e-05	6.97e-05	4.79e-05	0.000164	2.23e-05	0.70013	2.22704	0.205007	62.0379	8.32493	0.764574	0.765001	34
90643-36A		Plagioclase	0.313993	0.0032806	0.0217349	0.0001465	0.000378	6.04e-05	5.6e-05	4.63e-05	0.0002832	2.28e-05	0.907518	10.5762	0.35877	73.3251	39.198	1.31538	1.32078	35
90643-35A		Plagioclase	0.115219	0.0024696	0.0376763	0.000187	0.0005228	6.04e-05	0.0001293	4.68e-05	0.0001178	2.24e-05	1.20922	2.17018	0.190976	71.0822	8.11285	0.71233	0.712765	36
90643-34A		Plagioclase	0.148315	0.0025712	0.0330352	0.000187	0.0005745	6.27e-05	0.0001798	4.79e-05	0.0001524	2.27e-05	1.91524	3.18595	0.221644	71.0578	11.8977	0.824993	0.825798	37
Lincoln Reservoir Member (sample RC-10.1-008)
EK65DB09; J = 0.0020578 ± 0.00000032
90609-74A		Plagioclase	0.0382255	0.0024414	0.0139939	0.0001113	0.0001401	6.05e-05	0.0001115	4.54e-05	3.42e-05	2.22e-05	2.96345	2.11877	0.508715	77.65	7.86614	1.88455	1.88459	1
90609-73A		Plagioclase	2.35525	0.0030883	0.301075	0.0006868	0.0034426	6.8e-05	-4.25e-05	4.69e-05	6.38e-05	2.22e-05	-0.0524871	7.74195	0.0305494	99.1627	28.5783	0.111882	0.120293	2
90609-72A		Plagioclase	0.012167	0.0024382	0.003053	0.0001002	2.44e-05	5.97e-05	-4.33e-05	4.69e-05	1.72e-05	2.22e-05	-5.26963	2.08007	2.32798	52.3991	7.72278	8.62478	8.62478	3
90609-71A		Plagioclase	0.0255853	0.00244	0.0079613	0.0001047	0.0001432	5.89e-05	7.7e-05	4.74e-05	3.21e-05	2.22e-05	3.59113	2.15384	0.89351	67.0755	7.99607	3.3098	3.30982	4
90609-70A		Plagioclase	0.0326599	0.00244	0.0098094	0.000104	7.7e-05	5.86e-05	-1.82e-05	4.54e-05	3.28e-05	2.25e-05	-0.687576	2.29742	0.732534	69.1637	8.52782	2.71271	2.71274	5
90609-69A		Plagioclase	0.0313596	0.0024456	0.0121371	0.0001098	0.0002038	6.27e-05	3.4e-05	4.85e-05	-2.84751e-06	2.22e-05	1.03668	2.69157	0.586112	104.358	9.98687	2.16873	2.16878	6
90609-68A		Plagioclase	0.0181285	0.0024407	0.0066329	0.0001026	4.78e-05	6.13e-05	5.22e-05	4.49e-05	3.41e-05	2.22e-05	2.91148	1.31193	1.07395	48.0542	4.8747	3.98508	3.98509	7
90609-67A		Plagioclase	0.0374766	0.0024438	0.0122062	0.0001059	0.0001571	6.18e-05	4.04e-05	4.64e-05	3.54e-05	2.23e-05	1.22344	2.25073	0.585314	73.4297	8.35494	2.16773	2.16777	8
90609-66A		Plagioclase	0.0449144	0.0024414	0.0157078	0.0001094	0.0001005	6.13e-05	9.49e-05	4.79e-05	3.27e-05	2.23e-05	2.23499	2.32349	0.455138	81.3673	8.6244	1.68537	1.68542	9
90609-65A		Plagioclase	0.0859597	0.0024447	0.0265565	0.0001288	0.0002414	6.27e-05	0.0001421	4.54e-05	7.14e-05	2.24e-05	1.97721	2.51003	0.270285	77.6533	9.315	1.00048	1.00058	10
90609-64A		Plagioclase	0.0396831	0.0024393	0.0139025	0.0001118	0.0002058	6.27e-05	6.35e-05	4.49e-05	4.8e-05	2.23e-05	1.68703	1.88978	0.513626	66.3072	7.01765	1.90364	1.90367	11
90609-63A		Plagioclase	0.0384229	0.0024407	0.0107677	0.0001098	0.0001871	5.97e-05	4.61e-05	4.59e-05	4.34e-05	2.24e-05	1.57812	2.4245	0.665285	68.0474	8.99839	2.46303	2.46307	12
90609-62A		Plagioclase	0.057163	0.0024456	0.0185099	0.0001149	0.000253	6.47e-05	0.0001187	4.69e-05	8.53e-05	2.24e-05	2.36425	1.80534	0.387171	58.5324	6.70466	1.43521	1.43525	13
90609-61A		Plagioclase	0.0454848	0.0024421	0.0122766	0.0001089	0.000147	5.93e-05	9.78e-05	4.59e-05	6.2e-05	2.21e-05	2.93346	2.3142	0.577049	62.5255	8.58999	2.13684	2.13688	14
90609-60A		Plagioclase	0.0470001	0.0024508	0.0157172	0.0001144	0.0002829	6.09e-05	5.86e-05	4.69e-05	7.01e-05	2.24e-05	1.37346	1.71227	0.455885	57.3527	6.35961	1.69025	1.69028	15
90609-59A		Plagioclase	0.0709727	0.0024456	0.012484	0.0001089	0.0002858	5.97e-05	0.0001324	4.64e-05	0.0001323	2.22e-05	3.90077	2.67797	0.571557	47.134	9.93653	2.11493	2.11498	16
90609-58A		Plagioclase	0.0541441	0.0024475	0.0084753	0.0001043	0.000105	6.42e-05	5.11e-05	4.54e-05	5.23e-05	2.21e-05	2.21791	4.62976	0.838451	72.5575	17.1444	3.09017	3.09029	17
90609-57A		Plagioclase	0.614738	0.0033493	0.0139337	0.0001089	0.00064	6.58e-05	3.93e-05	4.59e-05	0.0019644	2.58e-05	1.03293	2.06573	0.609576	4.68929	7.66964	2.25844	2.25847	18
90609-56A		Plagioclase	0.0214297	0.0024399	0.004636	0.0001026	6.66e-05	5.93e-05	6.12e-05	4.69e-05	3.62e-05	2.24e-05	4.83095	2.48656	1.54701	53.8094	9.22814	5.72665	5.72666	19
90609-55A		Plagioclase	0.0321495	0.0024406	0.0102176	0.0001055	0.0001014	6.01e-05	0.0001276	4.54e-05	2.33e-05	2.23e-05	4.57052	2.64824	0.700816	84.2051	9.82652	2.59339	2.59343	20
90609-54A		Plagioclase	0.0245416	0.0024387	0.0082832	0.0001055	9.31e-05	6.01e-05	5.64e-05	4.54e-05	3.01e-05	2.22e-05	2.48869	1.97544	0.85888	66.756	7.33508	3.18269	3.18271	21
90609-53A		Plagioclase	0.0380714	0.0024399	0.0128314	0.000108	0.0001735	6.01e-05	6.67e-05	4.79e-05	3.81e-05	2.23e-05	1.8999	2.15419	0.557635	72.7083	7.99734	2.06563	2.06567	22
90609-52A		Plagioclase	0.010185	0.0024392	0.0020088	9.95e-05	2.16e-05	5.79e-05	-2.05e-05	4.74e-05	1.17e-05	2.2e-05	-3.72756	3.16267	3.51144	62.5859	11.7292	12.9805	12.9805	23
90609-51A		Plagioclase	0.0343161	0.0024405	0.0083119	0.0001043	0.0001437	6.05e-05	-1.51e-05	4.64e-05	6.76e-05	2.26e-05	-0.661935	1.66871	0.869171	40.5112	6.19813	3.22284	3.22286	24
90609-50A		Plagioclase	0.0353874	0.0024428	0.0118475	0.0001094	0.0001995	6.42e-05	0.0001043	4.74e-05	1.7e-05	2.22e-05	3.20886	2.68582	0.601292	90.0073	9.96558	2.22492	2.22498	25
90609-49A		Plagioclase	0.0225482	0.0024386	0.0027794	0.0001007	0.0001484	6.22e-05	2.43e-05	4.54e-05	1.88e-05	2.23e-05	3.19106	6.22594	2.57691	76.8065	23.0176	9.4666	9.46667	26
90609-48A		Plagioclase	0.0132019	0.0024398	0.002143	0.0001007	8.41e-05	6.22e-05	3.55e-05	4.37e-05	2.76e-05	2.2e-05	6.02273	2.55576	3.29904	41.4798	9.48426	12.2105	12.2105	27
90609-47A		Plagioclase	0.0670527	0.0024484	0.0183256	0.0001315	0.0004244	6.18e-05	6.87e-05	4.64e-05	0.0001102	2.24e-05	1.36296	1.91683	0.390954	52.4699	7.1179	1.4489	1.44894	28
90609-46A		Plagioclase	0.0191643	0.0024412	0.0053441	0.0001022	5.13e-05	5.82e-05	8.98937e-06	4.74e-05	2.21e-05	2.2e-05	0.611512	2.3734	1.32134	66.3066	8.80919	4.89241	4.89243	29
90609-45A		Plagioclase	0.0222817	0.0024405	0.0075141	0.0001055	7.68e-05	6.05e-05	-4.28e-05	4.69e-05	-1.26227e-06	2.2e-05	-2.06778	2.92325	0.938007	98.8615	10.8439	3.46916	3.4692	30
90609-44A		Plagioclase	0.0282412	0.0024412	0.0053967	0.0001039	6.11e-05	5.93e-05	4.22805e-06	4.64e-05	-6.57708e-06	2.24e-05	0.284388	5.5977	1.33059	107.172	20.7082	4.89434	4.89445	31
90609-43A		Plagioclase	0.0214519	0.0024411	0.007026	0.0001067	0.0001032	5.97e-05	4.20919e-06	4.49e-05	3.06123e-06	2.19e-05	0.217296	2.92626	1.00243	96.036	10.8551	3.70739	3.70743	32
90609-42A		Plagioclase	0.023183	0.0024404	0.0071568	0.0001026	4.62e-05	6.01e-05	1.88e-05	4.49e-05	9.89018e-06	2.19e-05	0.950315	2.85927	0.983061	88.4221	10.6073	3.63626	3.6363	33
90609-41A		Plagioclase	0.0192108	0.0024385	0.0054273	0.000101	4.6e-05	6.18e-05	2.21e-05	4.54e-05	3.2e-05	2.19e-05	1.47282	1.8368	1.29425	51.9719	6.82128	4.79737	4.79738	34
90609-40A		Plagioclase	0.034319	0.0024404	0.0122903	0.0001108	0.0001655	5.86e-05	0.0001376	4.85e-05	4.24969e-06	2.21e-05	4.05026	2.85113	0.576979	102.175	10.5772	2.13424	2.1343	35
90609-39A		Plagioclase	0.0176297	0.002439	0.0067374	0.0001039	9.56e-05	6.09e-05	7.07e-05	4.69e-05	2.53e-05	2.21e-05	3.79571	1.6491	1.05503	63.0725	6.1254	3.91218	3.91219	36
90609-38A		Plagioclase	0.0118223	0.002441	0.0034529	0.0001016	4.28e-05	6.05e-05	8.02e-05	4.41e-05	1.36e-05	2.2e-05	8.40028	2.59386	2.04937	75.6894	9.62529	7.58457	7.58458	37
Lincoln Reservoir Member (sample TC-12.1-012)
EK65DB23; J = 0.0020648 ± 0.00000035
90638-37A		Plagioclase	0.0917747	0.0004776	0.0300592	0.0001408	0.0005927	3.19e-05	0.0001715	3.26e-05	0.0001232	1.05e-05	2.61664	1.9336	0.107692	63.4112	7.20442	0.400452	0.400636	1
90638-36A		Plagioclase	0.056635	0.0002802	0.0190956	6.18e-05	0.0002655	3.69e-05	0.0001726	3.04e-05	0.0001049	1e-05	4.14366	1.49137	0.160606	50.3204	5.55922	0.597758	0.597831	2
90638-34A		Plagioclase	0.050615	0.0002419	0.015715	6.84e-05	0.0006607	4.24e-05	2.57e-05	3.55e-05	8.82e-05	1.02e-05	0.726313	1.57598	0.197632	49.0244	5.87411	0.735436	0.735503	3
90638-33A		Plagioclase	0.103899	0.00061	0.0239101	0.000111	0.0003733	4.1e-05	0.00012	3.25e-05	0.0001305	1.04e-05	2.22702	2.80244	0.135344	64.5768	10.4323	0.502379	0.502686	4
90638-32A		Plagioclase	0.070207	0.000246	0.0257076	9.22e-05	0.0003138	3.89e-05	4.41e-05	3.32e-05	5.34e-05	9.82904e-06	0.760868	2.13676	0.117032	78.3927	7.95971	0.435	0.435207	5
90638-31A		Plagioclase	4.07136	0.0033039	0.516662	0.0008401	0.0062746	7.56e-05	2.99e-05	2.69e-05	0.0001822	1.02e-05	0.0256456	7.76015	0.0153586	98.6763	28.7416	0.0564346	0.0741711	6
90638-30A		Plagioclase	0.059344	0.0002332	0.0221782	0.0001108	0.0003607	4.22e-05	7.93e-05	3.34e-05	6.61e-05	9.97647e-06	1.58253	1.84701	0.137609	69.1407	6.88242	0.51179	0.511922	7
90638-29A		Plagioclase	0.031718	0.0002	0.0082413	4.88e-05	0.0001574	2.41e-05	-6.89e-05	3.04e-05	6.71e-05	9.47629e-06	-3.69859	1.26517	0.34955	32.9859	4.71714	1.30159	1.30162	8
90638-28A		Plagioclase	0.096132	0.0004397	0.0196216	0.0001003	0.0004348	4.18e-05	6.91e-05	3.11e-05	0.0002162	1.01e-05	1.5566	1.67104	0.158046	34.16	6.22784	0.588011	0.588104	9
90638-27A		Plagioclase	0.109503	0.0005166	0.0272663	0.0001409	0.0004757	3.5e-05	6.17e-05	2.83e-05	0.0001251	9.94887e-06	0.999767	2.68206	0.112883	66.9011	9.98544	0.419109	0.419446	10
90638-26A		Plagioclase	0.277249	0.001504	0.0241916	0.0001014	0.000297	3.94e-05	0.0001607	3.41e-05	0.0002877	1.03e-05	2.93119	8.02039	0.14775	70.0495	29.6976	0.542616	0.544889	11
90638-25A		Plagioclase	0.047338	0.0002247	0.0168033	8.37e-05	0.0002983	3.28e-05	6.33e-05	3.11e-05	2.72e-05	9.87168e-06	1.66082	2.39745	0.179292	85.2375	8.92844	0.666061	0.66623	12
90638-24A		Plagioclase	0.073308	0.0004657	0.01989	0.0001004	0.0003306	2.97e-05	-1.5e-05	3.05e-05	9.94e-05	9.87168e-06	-0.332338	2.17604	0.152676	59.1732	8.10569	0.567441	0.567605	13
90638-23A		Plagioclase	0.109906	0.0005846	0.0238926	0.0001318	0.0004733	3.54e-05	9.29e-05	3.28e-05	0.0001425	1.05e-05	1.71196	2.88426	0.136164	62.7942	10.736	0.505337	0.505659	14
90638-22A		Plagioclase	0.0616205	0.0024851	0.0177438	0.000131	0.0002795	5.96e-05	5.74e-05	4.68e-05	6.98e-05	2.24e-05	1.42173	2.35186	0.407041	67.8332	8.75904	1.51228	1.51235	15
90638-21A		Plagioclase	0.165312	0.0026044	0.0296265	0.0001709	0.0005094	6.15e-05	0.0001089	4.42e-05	0.0001832	2.26e-05	1.61615	3.79344	0.247259	68.0856	14.107	0.915928	0.916235	16
90638-20A		Plagioclase	0.115698	0.0025273	0.034444	0.0002227	0.0006029	6.28e-05	0.0001211	4.58e-05	0.000135	2.26e-05	1.54414	2.24818	0.211989	67.0369	8.37381	0.78777	0.787896	17
90638-19A		Plagioclase	0.137365	0.0025671	0.0478695	0.0002592	0.0006504	6.42e-05	0.0002155	4.54e-05	0.0001199	2.24e-05	1.97637	2.19811	0.151779	76.7145	8.18775	0.564082	0.56425	18
90638-18A		Plagioclase	0.0698818	0.0024906	0.0227741	0.0001708	0.0003364	6.06e-05	0.0001655	4.54e-05	6.94e-05	2.26e-05	3.18637	2.28569	0.319647	74.5665	8.51319	1.18775	1.18783	19
90638-17A		Plagioclase	0.133394	0.0025798	0.0339062	0.0001961	0.0009155	6.68e-05	0.0001108	4.83e-05	0.0002051	2.26e-05	1.43198	2.18441	0.215816	55.6129	8.13683	0.802098	0.802215	20
90638-16A		Plagioclase	0.109405	0.0025182	0.0384229	0.0002408	0.0007548	6.19e-05	0.0001578	4.63e-05	0.0001133	2.24e-05	1.79778	2.03703	0.188577	71.6513	7.58899	0.701073	0.70119	21
90638-15A		Plagioclase	0.0869402	0.0025154	0.0296726	0.0002137	0.0004366	6.06e-05	0.0001378	4.67e-05	7.74e-05	2.24e-05	2.03116	2.2298	0.244098	76.2138	8.3055	0.907123	0.907231	22
90638-14A		Plagioclase	0.120486	0.0025394	0.0393662	0.0002407	0.0007673	6.47e-05	0.0002783	4.72e-05	0.0001559	2.27e-05	3.08906	2.0017	0.186225	65.4714	7.45764	0.692382	0.692496	23
90638-13A		Plagioclase	0.0594931	0.0024779	0.0210971	0.0001472	0.0002739	6.14e-05	9.55699e-06	4.67e-05	3.23e-05	2.25e-05	0.19783	2.36622	0.343218	84.087	8.81238	1.27512	1.27521	24
90638-12A		Plagioclase	0.0888566	0.0024945	0.0240844	0.0001626	0.0003285	6.57e-05	7.3e-05	4.67e-05	8.48e-05	2.23e-05	1.32339	2.68769	0.29893	72.9701	10.0063	1.10985	1.10998	25
90638-11A		Plagioclase	0.0723488	0.002478	0.0247119	0.000179	0.0004009	6.36e-05	6.77e-05	4.62e-05	8.7e-05	2.25e-05	1.19552	1.92132	0.293357	65.7408	7.15875	1.09087	1.09094	26
90638-10A		Plagioclase	0.105825	0.0025228	0.0300979	0.0001707	0.0003659	6.18e-05	0.0001045	4.44e-05	9.93e-05	2.25e-05	1.51293	2.58806	0.241141	73.7251	9.63638	0.895476	0.895623	27
90638-09A		Plagioclase	0.0801263	0.0024817	0.0286855	0.0001707	0.000386	6.13e-05	6.21e-05	4.72e-05	5.39e-05	2.22e-05	0.941505	2.26651	0.249624	81.2925	8.44193	0.927593	0.927702	28
90638-08A		Plagioclase	0.140209	0.0025805	0.025921	0.000179	0.0004495	6.22e-05	9.21e-05	4.77e-05	0.0002848	2.26e-05	1.54627	2.18791	0.28212	40.51	8.14982	1.04852	1.04861	29
90638-07A		Plagioclase	0.0914468	0.0024916	0.0270836	0.000196	0.0005303	6.22e-05	5.07e-05	4.57e-05	0.0001096	2.24e-05	0.813026	2.19823	0.266036	65.2252	8.18816	0.988718	0.988814	30
90638-06A		Plagioclase	0.0597097	0.0024771	0.0203091	0.0001274	0.0002492	6.22e-05	5.07e-05	4.66e-05	5.69e-05	2.22e-05	1.08269	2.14354	0.352369	73.0392	7.98491	1.30972	1.30979	31
90638-05A		Plagioclase	0.260718	0.0028259	0.0384913	0.0002136	0.0006095	6.51e-05	0.0001445	4.87e-05	0.0005878	2.33e-05	1.62835	2.2766	0.197865	33.6596	8.47942	0.735242	0.73538	32
90638-04A		Plagioclase	0.100513	0.0025065	0.033185	0.0002225	0.0005957	6.26e-05	0.0001568	4.99e-05	0.0001166	2.25e-05	2.04858	2.06004	0.218974	68.1113	7.67454	0.814044	0.814146	33
90638-03A		Plagioclase	0.110244	0.0025169	0.0389885	0.0002406	0.0007175	6.13e-05	0.0001959	4.66e-05	0.0001366	2.24e-05	2.17687	1.86744	0.185557	66.1365	6.95839	0.690086	0.690186	34
90638-02A		Plagioclase	0.151054	0.0025832	0.0439268	0.000259	0.0006848	6.13e-05	0.0001457	4.44e-05	0.0001012	2.24e-05	1.43589	2.80487	0.165835	81.6988	10.4413	0.615556	0.615807	35
90638-01A		Plagioclase	0.0758005	0.0024772	0.0203435	0.00012	0.0017287	7.6e-05	0.0001187	4.66e-05	0.0001106	2.27e-05	2.52255	2.21172	0.358598	59.4314	8.23832	1.33268	1.33276	36
Dry Gulch Member ( sample DG-11.1-004)
EK65DB13; J = 0.0020551 ± 0.00000037
90618-42A		Plagioclase	0.251007	0.0125605	0.0977086	0.0004792	0.000749	0.0004074	0.0001329	0.000148	2.96e-05	8.88e-05	0.707399	2.50141	0.303142	97.5687	9.27095	1.12066	1.12078	1
90618-41A		Plagioclase	0.21894	0.012589	0.0791891	0.0004667	0.0006206	0.0004106	0.0003893	0.0001575	9.79e-05	8.94e-05	2.55357	2.49496	0.376519	90.3629	9.24709	1.39193	1.39203	2
90618-40A		Plagioclase	0.331939	0.0125928	0.100682	0.0004845	0.0009085	0.0004103	0.0003993	0.00012	0.0003058	8.99e-05	2.05916	2.46888	0.296657	74.9959	9.15068	1.09676	1.09688	3
90618-39A		Plagioclase	0.105285	0.012563	0.0394653	0.0004404	0.0001283	0.0004063	0.0005852	0.000148	2.72e-05	8.92e-05	7.69564	2.77317	0.75469	103.901	10.2753	2.78839	2.78845	4
90618-38A		Plagioclase	0.0714952	0.0125282	0.0275098	0.0004397	0.000174	0.0004079	0.0001168	0.000148	-2.29e-05	8.93e-05	2.20001	2.93175	1.08074	112.975	10.8611	3.99178	3.99183	5
90618-37A		Plagioclase	0.163788	0.0125586	0.0622539	0.0004618	0.0004742	0.0004071	0.0002846	0.0001386	0.0001273	8.92e-05	2.36802	2.11237	0.476827	80.4032	7.83215	1.76414	1.76419	6
90618-36A		Plagioclase	0.210385	0.012531	0.0690444	0.0004652	0.0008949	0.0004079	0.0004836	0.0001292	0.0001658	8.93e-05	3.62587	2.47419	0.430211	81.2746	9.1703	1.59049	1.59058	7
90618-35A		Plagioclase	0.20868	0.012512	0.0537016	0.0004532	0.0007586	0.0004063	0.0003589	0.0001575	0.0003211	8.92e-05	3.45858	2.23806	0.553353	57.6489	8.29714	2.04674	2.04679	8
90618-34A		Plagioclase	0.161241	0.0124582	0.0580391	0.0004483	0.0008704	0.0004079	0.00038	0.00012	5.22e-05	8.89e-05	3.38441	2.64393	0.508847	95.2688	9.79774	1.88056	1.88064	9
90618-33A		Plagioclase	0.22702	0.012445	0.0763141	0.0004547	0.0005451	0.0004022	-0.0002891	0.000167	0.0001358	8.83e-05	-1.9576	2.35643	0.385356	79.4449	8.73488	1.42501	1.42509	10
90618-32A		Plagioclase	0.299744	0.0124328	0.0987571	0.0004845	0.0012006	0.0004092	3.94e-05	0.0001082	0.0002587	8.88e-05	0.205927	2.25618	0.298147	74.4951	8.36415	1.10274	1.10284	11
90618-31A		Plagioclase	0.191235	0.0123517	0.065854	0.0004559	0.0010023	0.0004039	0.000178	0.00012	0.0001003	8.79e-05	1.3938	2.50166	0.443421	86.2983	9.27187	1.63924	1.63932	12
90618-30A		Plagioclase	0.19514	0.0123239	0.0608306	0.0004553	0.0009616	0.0004014	0.0001237	0.0001292	0.0001796	8.78e-05	1.0485	2.36471	0.479462	73.8508	8.76554	1.77297	1.77304	13
90618-29A		Plagioclase	0.153435	0.012317	0.0553099	0.0004509	0.0007213	0.0004022	-0.0003604	0.0001386	8.04e-05	8.79e-05	-3.35648	2.19645	0.527286	79.4498	8.14321	1.95049	1.95054	14
90618-28A		Plagioclase	0.139477	0.0123037	0.0496023	0.0004505	0.000678	0.0004031	7.55e-05	0.0001109	9.16e-05	8.72e-05	0.783987	2.28791	0.583529	81.5255	8.4815	2.15813	2.15819	15
90618-27A		Plagioclase	0.406857	0.0123195	0.123448	0.0005315	0.0017291	0.0004005	0.0002151	0.0001292	0.0004355	8.85e-05	0.896269	2.27436	0.237755	69.139	8.43139	0.879343	0.879472	16
90618-26A		Plagioclase	0.250259	0.0122832	0.0644431	0.000462	0.0009762	0.0004016	-0.0001017	0.0001109	0.0003727	8.75e-05	-0.811512	2.11856	0.449938	54.6885	7.85507	1.66464	1.6647	17
90618-25A		Plagioclase	0.277555	0.0123047	0.0794089	0.0004578	0.0010451	0.0003979	1.12e-05	0.00012	0.0003573	8.82e-05	0.0727725	2.15005	0.368048	61.647	7.97158	1.36158	1.36165	18
90618-24A		Plagioclase	0.224979	0.0123237	0.0685197	0.0004764	0.0009506	0.0004006	0.0003596	0.0002154	0.0002687	8.72e-05	2.69313	2.21867	0.426565	67.6568	8.22542	1.57784	1.57791	19
90618-23A		Plagioclase	0.252446	0.0123259	0.0734271	0.0004768	0.0010717	0.0004022	-0.0002768	0.0001386	0.0003066	8.82e-05	-1.93393	2.10714	0.398172	61.4659	7.81283	1.47315	1.47321	20
90618-22A		Plagioclase	0.183854	0.0123419	0.0386562	0.0004443	0.0006132	0.0004031	0.0002154	0.0001109	0.0003531	8.78e-05	2.85672	2.14174	0.753765	45.0819	7.94082	2.78857	2.78861	21
90618-21A		Plagioclase	0.16082	0.0123412	0.0432483	0.0004416	0.0007218	0.0003997	0.0005247	0.0001109	0.000212	8.81e-05	6.21694	2.50688	0.676839	67.4142	9.29117	2.50211	2.50217	22
90618-20A		Plagioclase	0.159592	0.0124028	0.0551321	0.0004462	0.0006163	0.0004042	0.0001136	0.0001575	8.48e-05	8.82e-05	1.05479	2.47336	0.532392	85.603	9.16724	1.96826	1.96833	23
90618-19A		Plagioclase	0.210465	0.0124156	0.0736097	0.0004579	0.0006074	0.0004043	0.0001778	0.0001109	0.0001485	8.88e-05	1.23598	2.30188	0.399811	80.6532	8.53318	1.47862	1.4787	24
90618-18A		Plagioclase	0.283057	0.0124594	0.0718282	0.0004627	0.0008888	0.0004101	0.0004658	0.0001292	0.0004222	8.9e-05	3.31628	2.31712	0.4114	58.8574	8.58954	1.52144	1.52151	25
90618-17A		Plagioclase	0.300791	0.012521	0.0986425	0.0004973	0.0014548	0.0004068	0.0005119	0.00012	0.0002631	8.92e-05	2.64997	2.35733	0.300055	77.4065	8.73822	1.10957	1.10968	26
90618-16A		Plagioclase	0.25362	0.0125296	0.0806455	0.0004829	0.0012419	0.0004067	0.0005941	0.0001292	0.0001751	8.95e-05	3.76018	2.64672	0.368679	84.2339	9.80803	1.36253	1.36264	27
90618-15A		Plagioclase	0.403707	0.0126082	0.126635	0.0005977	0.0018966	0.0004102	0.0003603	0.0001292	0.0003035	8.97e-05	1.45165	2.52703	0.235227	79.4024	9.36566	0.869543	0.869705	28
90618-14A		Plagioclase	0.291536	0.0125606	0.0911365	0.0004792	0.0013267	0.0004077	0.0001085	0.0001292	0.0002857	8.95e-05	0.607256	2.28289	0.325846	71.5077	8.46293	1.20513	1.20522	29
90618-13A		Plagioclase	0.188466	0.012569	0.0466684	0.0004589	0.0008203	0.000413	0.0003593	0.000167	0.0003311	9.01e-05	3.92148	2.07747	0.642265	51.4826	7.70303	2.37639	2.37643	30
90618-12A		Plagioclase	0.124	0.0125634	0.0411747	0.0004458	0.0003888	0.0004099	0.0003326	7.38e-05	0.0001321	8.94e-05	4.1123	2.21797	0.719285	73.705	8.22282	2.66059	2.66064	31
90618-11A		Plagioclase	0.393535	0.0126167	0.100547	0.0004943	0.0013792	0.0004131	-8e-05	0.000148	0.0005757	8.97e-05	-0.405034	2.1827	0.296337	55.8965	8.09234	1.09621	1.09631	32
90618-10A		Plagioclase	0.212776	0.0125624	0.072965	0.0004887	0.0008132	0.0004103	3.63e-05	0.0001386	0.0001457	8.93e-05	0.252796	2.32465	0.406266	79.8877	8.61738	1.50243	1.50251	33
90618-09A		Plagioclase	0.182434	0.01254	0.065952	0.0004743	0.0006559	0.000406	0.0002759	0.0001575	9.12e-05	8.94e-05	2.12497	2.43515	0.450811	88.1648	9.02598	1.66678	1.66686	34
90618-08A		Plagioclase	0.167493	0.012526	0.0568279	0.0004696	0.0008589	0.0004075	-0.000178	9.94e-05	0.0001068	8.89e-05	-1.58973	2.31592	0.517813	78.7955	8.58508	1.91498	1.91504	35
90618-07A		Plagioclase	0.205018	0.012512	0.0621527	0.0004691	0.0010819	0.000407	0.000336	0.00012	0.0002428	8.95e-05	2.7434	2.24069	0.477195	68.0117	8.30687	1.76503	1.7651	36
90618-06A		Plagioclase	0.129132	0.0124717	0.0397292	0.0004461	0.0004431	0.0004075	0.0004443	0.0001766	9.19e-05	8.89e-05	5.66821	2.78772	0.745888	85.7848	10.3291	2.75578	2.75585	37
Dry Gulch Member (sample Q2-11.1-004)
EK65DB15; J = 0.0020586 ± 0.00000035
90623-37A		Plagioclase	0.147879	0.000536	0.0523616	0.0001011	0.0007042	3.78e-05	0.0001602	3.2e-05	0.0001142	1e-05	1.40834	2.22591	0.0591981	78.9504	8.26622	0.219338	0.219796	1
90623-36A		Plagioclase	0.171158	0.0006719	0.0448232	8.73e-05	0.0005192	3.84e-05	5.56e-05	3.19e-05	0.0002439	1.06e-05	0.570345	2.21236	0.0737485	58.0501	8.21601	0.273257	0.27362	2
90623-35A		Plagioclase	0.0940177	0.0024487	0.03103	0.0001465	0.0003651	6.42e-05	0.0001131	4.49e-05	6.73e-05	2.2e-05	1.48816	2.43827	0.228609	80.604	9.05287	0.846663	0.846805	3
90623-34A		Plagioclase	0.171665	0.0025164	0.0452625	0.0001702	0.0005883	6.22e-05	0.0001103	4.68e-05	0.0002266	2.28e-05	0.99385	2.33352	0.161712	61.6349	8.66488	0.599035	0.59922	4
90623-33A		Plagioclase	0.0883912	0.0024427	0.0219238	0.0001149	0.0002768	6.17e-05	9.42e-05	4.68e-05	0.0001213	2.23e-05	1.75101	2.44611	0.327247	60.7601	9.0819	1.21195	1.21205	5
90623-32A		Plagioclase	0.0532125	0.0024426	0.0186228	0.0001194	0.0002692	6.27e-05	0.0001017	4.49e-05	7.04e-05	2.22e-05	2.22477	1.81544	0.382418	63.6223	6.74472	1.41811	1.41816	6
90623-31A		Plagioclase	0.0905125	0.0024507	0.0305626	0.0001465	0.0003647	6.27e-05	7.53e-05	4.54e-05	5.61e-05	2.21e-05	1.00231	2.44928	0.232659	82.851	9.09362	0.861643	0.861784	7
90623-30A		Plagioclase	0.0578545	0.0024453	0.0206223	0.00012	0.0002453	6.13e-05	8.85e-05	4.63e-05	4.78e-05	2.22e-05	1.74504	2.1797	0.345962	77.8158	8.095	1.28197	1.28204	8
90623-29A		Plagioclase	0.0524369	0.0024393	0.0138483	0.0001118	0.0001041	5.89e-05	3.72e-05	4.74e-05	9.84e-05	2.25e-05	1.09105	1.70402	0.520439	45.079	6.33147	1.93037	1.9304	9
90623-28A		Plagioclase	0.0679265	0.0024483	0.0257584	0.00012	0.0003721	6.17e-05	2.25e-05	4.59e-05	3.1e-05	2.23e-05	0.354248	2.28699	0.277953	86.9032	8.49251	1.02973	1.02983	10
90623-27A		Plagioclase	0.110681	0.0024451	0.0401584	0.0001465	0.0004686	6.32e-05	0.0001432	4.45e-05	4.1e-05	2.22e-05	1.44624	2.50567	0.177445	91.0637	9.30247	0.657083	0.657276	11
90623-26A		Plagioclase	0.271336	0.0026703	0.0496745	0.000187	0.0007769	6.63e-05	0.0001099	4.49e-05	0.0005209	2.28e-05	0.896729	2.36363	0.149018	43.3462	8.77641	0.551978	0.552183	12
90623-25A		Plagioclase	0.128769	0.0024763	0.0352023	0.0001541	0.0004437	6.37e-05	7.58e-05	4.58e-05	0.0001592	2.23e-05	0.871614	2.33833	0.20384	64.0388	8.68268	0.755083	0.75523	13
90623-24A		Plagioclase	0.101359	0.0024493	0.0308332	0.0001541	0.0005057	5.96e-05	1.06e-05	4.58e-05	9.88e-05	2.2e-05	0.139533	2.33201	0.229956	71.0866	8.6593	0.851835	0.851965	14
90623-23A		Plagioclase	0.364249	0.0030266	0.0703246	0.0003152	0.0011525	6.8e-05	0.0002157	4.68e-05	0.0007247	2.32e-05	1.23974	2.14946	0.109144	41.5656	7.98293	0.404458	0.40469	15
90623-22A		Plagioclase	0.249846	0.0028583	0.0706919	0.0003343	0.0010552	6.74e-05	0.0002256	4.49e-05	0.0002942	2.24e-05	1.28915	2.34	0.104669	66.3177	8.68887	0.387725	0.388011	16
90623-21A		Plagioclase	0.173241	0.0025773	0.0538757	0.0002962	0.0007609	6.17e-05	7.61e-05	4.49e-05	0.0001449	2.22e-05	0.57011	2.43098	0.133843	75.7459	9.02587	0.495702	0.495944	17
90623-20A		Plagioclase	0.153989	0.00248	0.0446731	0.0001465	0.000565	6.09e-05	0.0002102	4.63e-05	0.0001479	2.23e-05	1.89773	2.53173	0.160521	73.5528	9.39896	0.594383	0.594602	18
90623-19A		Plagioclase	0.240289	0.002574	0.0471735	0.0001465	0.0006218	6.36e-05	0.0001647	4.74e-05	0.0003913	2.28e-05	1.40641	2.66933	0.155882	52.4851	9.9084	0.577044	0.577293	19
90623-18A		Plagioclase	0.132642	0.0024922	0.0446642	0.0001869	0.000659	6.57e-05	0.0001971	4.79e-05	0.0001148	2.23e-05	1.77645	2.27058	0.160972	76.5723	8.4317	0.596371	0.596546	20
90623-17A		Plagioclase	0.0799072	0.0024479	0.0243697	0.0001261	0.0002732	6.04e-05	0.0001066	4.63e-05	0.0001007	2.22e-05	1.75975	2.11318	0.293113	64.5434	7.84849	1.08628	1.08636	21
90623-16A		Plagioclase	0.105548	0.0024761	0.035175	0.000162	0.0004583	6.13e-05	0.0001224	4.58e-05	8.48e-05	2.2e-05	1.39871	2.33308	0.201451	77.8809	8.66326	0.746243	0.746391	22
90623-15A		Plagioclase	0.856316	0.0035608	0.0520638	0.0001956	0.0012459	6.57e-05	0.0001408	4.63e-05	0.0025801	2.63e-05	1.08579	1.69252	0.169603	10.3065	6.28885	0.629093	0.629186	23
90623-14A		Plagioclase	0.226305	0.0027128	0.0459073	0.0002132	0.0006951	6.13e-05	9.77e-05	4.63e-05	0.0003847	2.32e-05	0.854507	2.45755	0.163629	49.9399	9.12427	0.605983	0.606184	24
90623-13A		Plagioclase	0.174866	0.0026304	0.0581827	0.0003247	0.000868	6.17e-05	0.000129	4.63e-05	0.0001485	2.22e-05	0.88879	2.27529	0.124356	75.8435	8.44917	0.460713	0.46094	25
90623-12A		Plagioclase	0.17933	0.00267	0.0556737	0.0002868	0.0009322	6.52e-05	0.0001007	4.63e-05	0.0001701	2.24e-05	0.72515	2.33426	0.131296	72.6034	8.66762	0.486362	0.486589	26
90623-11A		Plagioclase	0.183872	0.0025739	0.0473665	0.0002043	0.0006279	6.47e-05	0.0001543	4.63e-05	0.0002847	2.31e-05	1.30407	2.13657	0.157088	55.1287	7.93514	0.582142	0.582301	27
90623-10A		Plagioclase	0.150274	0.002594	0.0396269	0.0002132	0.0005934	6.04e-05	0.0001835	4.54e-05	0.0001915	2.26e-05	1.85209	2.42096	0.184182	63.9316	8.98875	0.682152	0.682326	28
90623-09A		Plagioclase	0.157153	0.0025738	0.0527417	0.0002868	0.0007378	6.31e-05	0.0001172	4.68e-05	0.0001324	2.23e-05	0.888158	2.26191	0.137135	76.0504	8.39959	0.508068	0.508272	29
90623-08A		Plagioclase	0.179408	0.0026304	0.0598178	0.0003057	0.0008535	6.57e-05	0.0002129	4.74e-05	0.0001411	2.21e-05	1.42146	2.34855	0.120665	78.4329	8.72056	0.44697	0.44722	30
90623-07A		Plagioclase	0.198575	0.00267	0.0501736	0.0002587	0.0009304	6.63e-05	0.000207	4.79e-05	0.0003118	2.27e-05	1.64575	2.16591	0.147043	54.8076	8.04389	0.544883	0.545058	31
90623-06A		Plagioclase	0.131189	0.0024798	0.0318	0.000162	0.0004494	6.52e-05	0.0001117	4.68e-05	0.0002119	2.25e-05	1.39989	2.18852	0.22725	53.1332	8.12768	0.842061	0.842176	32
90623-05A		Plagioclase	0.0627867	0.002449	0.0206189	0.0001255	0.0002653	6.04e-05	3.3e-05	4.58e-05	5.63e-05	2.24e-05	0.637737	2.25107	0.34809	74.0657	8.35944	1.28966	1.28974	33
90623-04A		Plagioclase	0.106042	0.0024479	0.0326076	0.0001465	0.0004589	6.31e-05	7.6e-05	4.63e-05	0.0001157	2.23e-05	0.928403	2.22614	0.219624	68.576	8.26706	0.813739	0.813863	34
90623-03A		Plagioclase	0.110574	0.0024656	0.0172779	0.0001206	0.0002095	6.27e-05	7.65e-05	4.84e-05	0.0002411	2.28e-05	1.76042	2.30089	0.422837	36.0026	8.54401	1.56644	1.5665	35
90623-02A		Plagioclase	0.242577	0.0027128	0.0631015	0.0003343	0.0010986	6.47e-05	0.0002022	4.84e-05	0.0003442	2.3e-05	1.27335	2.26391	0.11869	58.9874	8.40699	0.439732	0.439968	36
90623-01A		Plagioclase	0.270854	0.0027128	0.0629896	0.0002495	0.0008236	6.57e-05	0.0001082	4.68e-05	0.0004016	2.27e-05	0.682074	2.41906	0.117404	56.3601	8.98172	0.434827	0.435099	37
Wooden Shoe Member (sample RC-10.1-002)
QL-OSU-31B; J = 0.0037308 ± 0.00000092
2483-01		sanidine	0.0767602	1.88e-05	0.0509287	1.68e-05	0.0006025	7.92454e-07	0.0017143	2.77e-05	3.57254e-06	8.35429e-08	0.0659771	1.48816	0.0007932	98.7815	10.133	0.005386	0.0059309
2483-02		sanidine	0.0363036	1.76e-05	0.023197	1.73e-05	0.0002775	5.05868e-07	0.0007647	2.18e-05	5.99548e-06	9.32019e-08	0.064616	1.48969	0.0018093	95.2298	10.1434	0.0122859	0.0125348
2483-03		sanidine	0.0299224	1.97e-05	0.0198171	1.71e-05	0.0002359	4.49098e-07	0.0006322	2.22e-05	1.52517e-06	7.36474e-08	0.0625233	1.48871	0.0019746	98.6403	10.1367	0.013408	0.0136362
2483-04		sanidine	0.0422282	1.85e-05	0.0282567	1.63e-05	0.0003356	5.44092e-07	0.000924	2.06e-05	7.68056e-07	6.69823e-08	0.0640922	1.48815	0.0012941	99.6253	10.133	0.0087873	0.0091315
2483-05		sanidine	0.0896487	2.15e-05	0.0587547	1.82e-05	0.0006983	8.70944e-07	0.0019122	2.62e-05	7.6759e-06	1.05266e-07	0.0637908	1.48862	0.0008017	97.6067	10.1361	0.005444	0.005984
2483-06		sanidine	0.0425674	1.79e-05	0.0282709	1.74e-05	0.000336	5.43847e-07	0.0008717	2.19e-05	1.70491e-06	7.04391e-08	0.0604333	1.48937	0.0013445	98.9612	10.1412	0.0091297	0.0094619
2483-07		sanidine	0.070917	1.97e-05	0.0470952	1.75e-05	0.0005583	7.56691e-07	0.0015703	2.49e-05	3.06523e-06	8.14696e-08	0.0653527	1.48826	0.0008703	98.8793	10.1337	0.0059098	0.0064105
2483-08		sanidine	0.0418017	1.87e-05	0.027986	1.58e-05	0.0003313	5.96656e-07	0.0009751	2.26e-05	7.86297e-07	6.94433e-08	0.0682887	1.48726	0.0013094	99.6178	10.1269	0.008891	0.0092309
2483-09		sanidine	0.060589	1.87e-05	0.0394908	1.64e-05	0.0004713	7.31566e-07	0.0012852	2.36e-05	6.20839e-06	9.78015e-08	0.0637849	1.48913	0.0010793	97.103	10.1396	0.0073289	0.0077387
2483-10		sanidine	0.0490742	1.97e-05	0.0329081	1.64e-05	0.0003903	5.99837e-07	0.0011356	2.46e-05	5.31224e-07	6.61714e-08	0.0676369	1.48839	0.0011333	99.8551	10.1346	0.0076952	0.0080861
2483-11		sanidine	0.0788991	2.11e-05	0.0519645	1.79e-05	0.0006197	8.4322e-07	0.0017016	2.57e-05	4.86827e-06	8.32617e-08	0.0641828	1.49219	0.0008182	98.3235	10.1604	0.0055557	0.0060882
2483-12		sanidine	0.0528456	1.86e-05	0.0347193	1.77e-05	0.0004126	6.03352e-07	0.0012271	2.31e-05	4.06586e-06	7.97232e-08	0.0692711	1.48915	0.0011594	97.881	10.1397	0.0078723	0.0082552
2483-13		sanidine	0.0255777	1.74e-05	0.0171438	1.64e-05	0.000205	4.06929e-07	0.0005779	2.07e-05	2.88718e-07	7.11949e-08	0.0660718	1.48884	0.0021498	99.8378	10.1376	0.0145974	0.0148073
2483-14		sanidine	0.0239219	1.56e-05	0.0159252	1.68e-05	0.0001885	3.9033e-07	0.0004673	2.24e-05	9.86646e-07	6.61736e-08	0.0575079	1.48519	0.0022359	98.9176	10.1128	0.0151824	0.0153833
2483-15		sanidine	0.0459075	1.86e-05	0.0285059	1.74e-05	0.0003414	5.12015e-07	0.0008431	2.08e-05	1.18e-05	1.18569e-07	0.0579662	1.48823	0.0016764	92.4505	10.1335	0.011383	0.0116508
2483-16		sanidine	0.116274	1.95e-05	0.0768896	1.82e-05	0.0009165	1.10031e-06	0.0025414	2.91e-05	6.40884e-06	9.96559e-08	0.0647824	1.48919	0.0005905	98.5224	10.14	0.0040094	0.004717
2483-17		sanidine	0.130812	2.23e-05	0.0872439	1.89e-05	0.0010396	1.30785e-06	0.0028215	3.02e-05	3.09705e-06	8.27304e-08	0.0633865	1.49059	0.00051	99.4593	10.1495	0.0034629	0.0042636
2483-18		sanidine	0.0349667	1.97e-05	0.0233862	1.64e-05	0.000279	4.69454e-07	0.0008571	2.41e-05	7.78798e-07	6.77973e-08	0.0718347	1.48738	0.0016005	99.5246	10.1277	0.0108678	0.0111477
2483-19		sanidine	0.0927083	1.97e-05	0.0608824	1.85e-05	0.0007258	9.41741e-07	0.0020355	2.64e-05	6.65905e-06	9.04775e-08	0.0655301	1.49197	0.0007198	98.024	10.1589	0.0048877	0.0054852
2483-20		sanidine	0.0599115	1.69e-05	0.0392831	1.83e-05	0.0004681	6.7806e-07	0.0016756	2.48e-05	5.04825e-06	9.77851e-08	0.0836032	1.48937	0.0011098	97.7001	10.1412	0.0075359	0.0079351
2483-21		sanidine	0.0369031	1.95e-05	0.024555	1.62e-05	0.0002934	5.32023e-07	0.0009233	2.28e-05	9.85734e-07	6.86192e-08	0.0736955	1.49311	0.001522	99.3962	10.1666	0.0103344	0.0106306
2483-22		sanidine	0.0980848	1.87e-05	0.0647724	1.81e-05	0.0007735	1.01898e-06	0.0018826	2.8e-05	5.92423e-06	9.59523e-08	0.0569665	1.48853	0.0006807	98.3438	10.1355	0.0046222	0.0052473
2483-23		sanidine	0.0807587	1.94e-05	0.0530521	1.74e-05	0.0006335	8.28203e-07	0.0022123	2.66e-05	5.72753e-06	1.06737e-07	0.0817338	1.49257	0.0008634	98.0943	10.163	0.0058629	0.00637
2483-24		sanidine	0.112312	1.96e-05	0.0730739	1.86e-05	0.0008715	1.05452e-06	0.0025477	2.97e-05	9.46029e-06	1.09052e-07	0.0683354	1.50031	0.0006533	97.6593	10.2155	0.0044362	0.0050939
2483-25		sanidine	0.0819038	2.04e-05	0.0535809	1.67e-05	0.0006377	8.30627e-07	0.0016546	2.43e-05	7.65147e-06	9.69003e-08	0.0605268	1.48764	0.0008133	97.365	10.1295	0.0055223	0.0060546
2483-26		sanidine	0.0472402	1.89e-05	0.0308878	1.72e-05	0.0003701	6.15948e-07	0.0010005	2.39e-05	4.18413e-06	8.68274e-08	0.0634875	1.49078	0.0013339	97.5183	10.1508	0.0090575	0.0093929
2483-27		sanidine	0.0476896	1.72e-05	0.0313232	1.74e-05	0.000374	5.56156e-07	0.0010672	2.36e-05	3.72506e-06	8.68238e-08	0.0667766	1.48893	0.0012988	97.8398	10.1382	0.0088193	0.0091626
Big Bluff Member (sample RC-10.1-011)
QL-OSU-31A; J = 0.0037279 ± 0.00000048
2443-01		sanidine	0.0127985	1.41e-05	0.0078012	1.65e-05	9.27e-05	2.5589e-07	0.0002936	1.1e-05	8.20161e-07	7.28724e-08	0.0737672	1.61143	0.0047693	98.2636	10.9613	0.032345	0.0323757
2443-02		sanidine	0.0058651	1.47e-05	0.0036054	1.83e-05	4.29e-05	1.91495e-07	9.72e-05	9.40777e-06	4.45396e-07	7.69851e-08	0.0528439	1.59126	0.0110781	97.8592	10.8245	0.0751364	0.0751493
2443-03		sanidine	0.0096366	1.37e-05	0.0059067	1.7e-05	6.99e-05	2.08133e-07	0.0002229	1.1e-05	4.34639e-07	7.31313e-08	0.0739527	1.61173	0.0063738	98.8317	10.9634	0.0432264	0.0432494
2443-04		sanidine	0.0388506	1.7e-05	0.0228337	1.75e-05	0.0002725	4.39344e-07	0.0007673	1.29e-05	7.05337e-06	9.88347e-08	0.0658636	1.61114	0.0019383	94.73	10.9594	0.0131452	0.0132205
2443-05		sanidine	0.0781113	1.97e-05	0.044603	1.83e-05	0.0005314	8.08005e-07	0.0016192	1.63e-05	6.23574e-06	9.60788e-08	0.071153	1.71164	0.001056	97.7762	11.6409	0.0071587	0.0073135
2443-07		sanidine	0.0128988	1.86e-05	0.0078404	1.61e-05	9.41e-05	2.56631e-07	0.0002885	1.02e-05	6.8022e-07	6.84083e-08	0.0721313	1.62145	0.0048599	98.599	11.0293	0.0329585	0.0329891
2443-08		sanidine	0.0117381	1.33e-05	0.0071537	1.62e-05	8.57e-05	2.54011e-07	0.0003214	1.16e-05	6.98284e-07	7.72474e-08	0.0880532	1.61451	0.005228	98.4367	10.9823	0.0354554	0.0354835
2443-09		sanidine	0.0066786	1.32e-05	0.004089	1.62e-05	4.87e-05	1.82205e-07	0.0001426	1.07e-05	3.8674e-07	7.13522e-08	0.0683636	1.60708	0.0088631	98.4357	10.9318	0.0601101	0.0601265
2443-10		sanidine	0.0163625	1.8e-05	0.0101489	1.74e-05	0.0001213	3.05922e-07	0.0003676	1.18e-05	2.41218e-07	6.92569e-08	0.0709963	1.60726	0.0038644	99.7343	10.9331	0.0262087	0.0262464
2443-11		sanidine	0.0041215	1.35e-05	0.0024698	1.62e-05	2.91e-05	1.26136e-07	7.08e-05	1.02e-05	1.47146e-07	7.07873e-08	0.0561761	1.65247	0.0148673	99.0652	11.2396	0.100813	0.100824
2443-12		sanidine	0.0067723	2.02e-05	0.0041942	1.84e-05	4.95e-05	1.83206e-07	0.0001406	1.07e-05	1.03104e-07	6.84371e-08	0.0656883	1.60923	0.0098619	99.7052	10.9464	0.0668833	0.0668981
2443-15		sanidine	0.0045662	1.31e-05	0.0028492	1.79e-05	3.31e-05	1.68003e-07	0.0001019	1.07e-05	2.36854e-07	7.19638e-08	0.070126	1.57984	0.0133205	98.6214	10.7471	0.0903494	0.09036
2443-16		sanidine	0.0033521	1.32e-05	0.0020921	1.62e-05	2.48e-05	1.358e-07	8.73e-05	1.03e-05	-2.37463e-08	6.7834e-08	0.081768	1.60817	0.016992	100.414	10.9393	0.11524	0.115249
2443-17		sanidine	0.0048821	1.34e-05	0.003013	1.53e-05	3.55e-05	1.58511e-07	0.000123	1.03e-05	2.13007e-07	7.57081e-08	0.0800274	1.60168	0.0119569	98.8916	10.8952	0.0810938	0.0811059
2443-18		sanidine	0.0122307	1.7e-05	0.0075704	1.67e-05	8.98e-05	2.45117e-07	0.00027	1.13e-05	2.94495e-07	6.77562e-08	0.0699085	1.60606	0.0049811	99.4515	10.9249	0.0337818	0.033811
2443-19		sanidine	0.0105564	1.7e-05	0.006444	1.5e-05	7.66e-05	2.10648e-07	0.0002884	1e-05	7.9469e-07	7.67954e-08	0.0877091	1.60414	0.0058008	97.9637	10.9119	0.0393416	0.0393667
2443-20		sanidine	0.0129806	2.02e-05	0.0080042	1.68e-05	9.49e-05	2.56674e-07	0.0002425	1.04e-05	2.77649e-07	6.85032e-08	0.0593849	1.613	0.0049408	99.505	10.972	0.0335077	0.0335374
2443-21		sanidine	0.0187737	1.28e-05	0.0115553	1.6e-05	0.0001377	2.91957e-07	0.0004364	1.2e-05	4.55239e-07	7.48774e-08	0.0740235	1.61517	0.0031675	99.4562	10.9867	0.0214811	0.0215275
2443-22		sanidine	0.0111565	1.7e-05	0.0068038	1.65e-05	8.13e-05	2.42472e-07	0.0002728	1.04e-05	6.4521e-07	6.9372e-08	0.0785727	1.61388	0.0055492	98.4627	10.9779	0.0376342	0.0376607
2443-23		sanidine	0.013424	1.49e-05	0.0081259	1.86e-05	9.63e-05	2.67631e-07	0.0002893	1.09e-05	1.41422e-06	6.92729e-08	0.0697805	1.60209	0.0048346	97.0197	10.898	0.0327892	0.0328191
2443-25		sanidine	0.0189422	1.49e-05	0.0116237	1.76e-05	0.0001375	3.11702e-07	0.0004484	1.14e-05	1.01541e-06	6.87068e-08	0.075611	1.60583	0.0032725	98.5819	10.9234	0.0221943	0.0222388
2443-26		sanidine	0.0164145	1.41e-05	0.0094215	1.74e-05	0.0001125	3.03256e-07	0.0003596	1.13e-05	4.30661e-06	8.2454e-08	0.0748152	1.60804	0.004238	92.3333	10.9383	0.0287424	0.0287768
2443-27		sanidine	0.0112465	1.45e-05	0.0069374	1.68e-05	8.25e-05	2.22267e-07	0.0003076	1.09e-05	3.59747e-07	6.36872e-08	0.0869103	1.60843	0.0052058	99.2572	10.941	0.0353059	0.035334
2443-28		sanidine	0.0247226	1.71e-05	0.0153043	1.86e-05	0.0001808	3.87572e-07	0.0005826	1.15e-05	5.10749e-07	6.84051e-08	0.0746142	1.60769	0.0026212	99.5651	10.936	0.0177769	0.0178325
2443-29		sanidine	0.0069165	1.71e-05	0.0038025	1.73e-05	4.56e-05	1.70918e-07	0.0001308	1.12e-05	2.75183e-06	9.03568e-08	0.0674021	1.60483	0.0111353	88.2625	10.9166	0.0755208	0.0755339
2443-30		sanidine	0.0232441	1.78e-05	0.0141802	1.74e-05	0.0001683	3.53059e-07	0.0005184	1.27e-05	1.57903e-06	7.87889e-08	0.0716572	1.60808	0.0028716	98.1434	10.9386	0.0194749	0.0195256
2443-31		sanidine	0.0031856	1.35e-05	0.0019567	1.68e-05	2.36e-05	1.35236e-07	8.85e-05	1e-05	1.41057e-08	6.697e-08	0.0886333	1.62875	0.0186852	100.085	11.0788	0.126714	0.126722
2443-32		sanidine	0.0090028	1.87e-05	0.0055355	1.63e-05	6.66e-05	2.07323e-07	0.0001497	1.13e-05	1.36389e-07	7.19555e-08	0.0530023	1.62041	0.0070207	99.6764	11.0222	0.0476126	0.0476337
2443-33		sanidine	0.0262829	1.79e-05	0.0151659	1.78e-05	0.0001815	4.17356e-07	0.0005058	1.1e-05	6.29491e-06	9.14837e-08	0.065365	1.61099	0.0028725	92.9952	10.9584	0.0194811	0.019532
2443-34		sanidine	0.0286947	1.72e-05	0.0166727	1.68e-05	0.0001991	3.94975e-07	0.0007084	1.47e-05	6.27258e-06	1.05992e-07	0.0832768	1.61135	0.0027052	93.6625	10.9608	0.0183463	0.0184004
2443-35		sanidine	0.0120569	1.56e-05	0.0073799	1.74e-05	8.82e-05	2.54541e-07	0.0003417	1.22e-05	6.49168e-07	7.49086e-08	0.0907426	1.61042	0.0053082	98.6127	10.9545	0.0360001	0.0360276
2443-36		sanidine	0.0153532	1.86e-05	0.0093975	1.73e-05	0.0001122	3.02796e-07	0.0003573	1.35e-05	9.91663e-07	7.33086e-08	0.0745156	1.60451	0.004258	98.2515	10.9144	0.0288784	0.0289125
2443-37		sanidine	0.0289424	1.87e-05	0.0169551	1.85e-05	0.0002025	4.15856e-07	0.000786	1.26e-05	5.78791e-06	9.12818e-08	0.0908642	1.60801	0.002626	94.2381	10.9381	0.0178094	0.0178649
2443-38		sanidine	0.0149124	1.8e-05	0.0092011	1.64e-05	0.0001093	2.81898e-07	0.0004263	1.15e-05	3.28795e-07	6.5109e-08	0.0908013	1.61298	0.0040695	99.5637	10.9718	0.0275991	0.0276352
2443-39		sanidine	0.0118822	1.87e-05	0.007273	1.78e-05	8.66e-05	2.54179e-07	0.0003361	1.18e-05	4.34537e-07	6.69736e-08	0.0905685	1.61884	0.0054693	99.1279	11.0116	0.0370912	0.0371182
2443-40		sanidine	0.0106008	1.37e-05	0.0064512	1.91e-05	7.73e-05	2.20765e-07	0.0002586	1.14e-05	8.26149e-07	7.06872e-08	0.0785605	1.60744	0.0061633	97.8621	10.9343	0.0417998	0.0418235
Magpie Basin Member (sample MP-11.2-001)
QL-OSU-31A; J = 0.0037198 ± 0.0000007
2459-01		sanidine	0.0156358	1.51e-05	0.0089626	1.35e-05	0.000107	2.94701e-07	0.0005046	2.99204e-06	2.30491e-06	7.98124e-08	0.110351	1.67153	0.0040301	95.85	11.3443	0.0272665	0.0273495
2459-02		sanidine	0.0057	1.35e-05	0.0030503	1.39e-05	3.62e-05	1.58788e-07	0.0003228	2.12788e-06	2.40816e-06	9.11142e-08	0.207425	1.64067	0.0124417	87.8266	11.1355	0.0841875	0.0842134
2459-03		sanidine	0.0132887	1.56e-05	0.0079049	1.33e-05	9.39e-05	2.60448e-07	0.0003353	2.61856e-06	6.94194e-07	7.12644e-08	0.0831492	1.65749	0.0043553	98.6369	11.2493	0.0294686	0.0295441
2459-04		sanidine	0.0165357	1.49e-05	0.0098235	1.3e-05	0.0001163	2.99137e-07	0.0003183	2.37162e-06	5.84552e-07	8.44332e-08	0.0634987	1.66734	0.0037048	99.0938	11.3159	0.0250662	0.0251559
2459-05		sanidine	0.0485913	1.7e-05	0.0288358	1.35e-05	0.0003422	5.75217e-07	0.0011313	3.99366e-06	1.79142e-06	8.12055e-08	0.0768957	1.66893	0.0012957	99.0806	11.3267	0.0087664	0.0090203
2459-06		sanidine	0.0104479	1.49e-05	0.0062362	1.27e-05	7.43e-05	2.12933e-07	0.0002047	2.28985e-06	4.96433e-08	7.49629e-08	0.064351	1.67485	0.0055054	100.011	11.3667	0.0372477	0.0373087
2459-07		sanidine	0.0128098	1.49e-05	0.0076461	1.29e-05	9.08e-05	2.6856e-07	0.0002413	2.40279e-06	1.56747e-07	6.86983e-08	0.0618593	1.67097	0.0043509	99.7812	11.3405	0.0294369	0.0295137
2459-08		sanidine	0.0153458	1.56e-05	0.0091428	1.36e-05	0.0001085	2.96089e-07	0.0003909	2.4291e-06	3.24559e-07	7.34642e-08	0.0838077	1.67053	0.0038546	99.5673	11.3375	0.0260797	0.0261663
2459-10		sanidine	0.0138834	1.63e-05	0.0082558	1.29e-05	9.88e-05	2.82438e-07	0.0002544	2.41399e-06	1.43955e-07	8.47905e-08	0.0603973	1.67815	0.0044965	99.8332	11.3891	0.0304218	0.0304967
2459-11		sanidine	0.0344545	1.77e-05	0.0205501	1.26e-05	0.0002434	4.64428e-07	0.0007072	3.50205e-06	5.52167e-07	7.57249e-08	0.067453	1.67057	0.0017368	99.6812	11.3378	0.0117508	0.0119418
2459-12		sanidine	0.0035532	1.56e-05	0.0021114	1.26e-05	2.47e-05	1.37011e-07	6.84e-05	1.72364e-06	1.84462e-07	7.1989e-08	0.0634647	1.65861	0.0159825	98.5986	11.2569	0.108139	0.108159
2459-13		sanidine	0.0082747	1.63e-05	0.0049289	1.33e-05	5.83e-05	2.07745e-07	0.0002443	2.38882e-06	2.71667e-07	7.49631e-08	0.0971314	1.66556	0.0071977	99.2502	11.3039	0.0486989	0.048745
2459-14		sanidine	0.0099895	1.7e-05	0.0059382	1.32e-05	7.1e-05	2.42547e-07	0.0003224	2.66126e-06	3.74101e-07	7.27243e-08	0.106397	1.66703	0.0059527	99.1345	11.3138	0.040275	0.0403309
2459-15		sanidine	0.0147591	1.63e-05	0.0088333	1.31e-05	0.0001039	3.04623e-07	0.0003058	2.33151e-06	2.82632e-07	7.27233e-08	0.0678585	1.66329	0.0039465	99.5891	11.2885	0.0267019	0.0267858
2459-16		sanidine	0.0163671	1.46e-05	0.0097408	1.25e-05	0.0001161	2.99025e-07	0.0003173	2.36829e-06	3.78568e-07	7.80363e-08	0.0638541	1.67051	0.0035497	99.4603	11.3374	0.0240167	0.0241107
2459-17		sanidine	0.0104161	1.56e-05	0.0062628	1.27e-05	7.41e-05	2.53806e-07	0.0002022	2.08446e-06	1.59386e-08	7.49619e-08	0.0632761	1.66423	0.0055163	100.105	11.2949	0.037323	0.0373832
2459-18		sanidine	0.0063473	1.43e-05	0.003796	1.32e-05	4.52e-05	1.82039e-07	0.0001341	1.97346e-06	1.19083e-07	7.72574e-08	0.0692309	1.66481	0.0092099	99.6044	11.2988	0.0623134	0.0623494
2459-19		sanidine	0.016013	1.63e-05	0.0095017	1.28e-05	0.0001132	2.8792e-07	0.0003303	2.44471e-06	4.94707e-07	7.42116e-08	0.068131	1.67176	0.0036646	99.2381	11.3458	0.0247938	0.024885
2459-20		sanidine	0.0137971	1.64e-05	0.0082122	1.31e-05	9.8e-05	2.71625e-07	0.0003459	2.37901e-06	2.40399e-07	7.42105e-08	0.0825628	1.67396	0.0042909	99.6757	11.3607	0.0290309	0.029109
2459-21		sanidine	0.0116512	1.56e-05	0.0067869	1.4e-05	8.1e-05	2.14738e-07	0.0002543	2.32304e-06	8.49316e-07	7.74034e-08	0.073443	1.68159	0.0053789	97.9931	11.4123	0.0363911	0.0364541
2459-22		sanidine	0.0100288	1.63e-05	0.0059928	1.46e-05	7.08e-05	2.42234e-07	0.0002848	2.18522e-06	8.87285e-08	7.12618e-08	0.0931341	1.6721	0.0060534	99.9577	11.3481	0.040956	0.0410112
2459-23		sanidine	0.0108938	1.56e-05	0.0064476	1.28e-05	7.6e-05	2.33606e-07	0.0001979	2.3497e-06	4.30952e-07	7.71474e-08	0.0601685	1.67131	0.0054491	98.9595	11.3428	0.0368673	0.0369287
2459-24		sanidine	0.0099394	1.59e-05	0.0058655	1.25e-05	7e-05	2.31544e-07	0.0003262	2.57174e-06	6.37343e-07	8.02384e-08	0.109019	1.66582	0.0060656	98.3421	11.3056	0.0410395	0.0410942
2459-25		sanidine	0.0089065	1.49e-05	0.005308	1.3e-05	6.28e-05	2.19154e-07	0.0002526	2.24972e-06	1.93903e-07	7.41206e-08	0.0932707	1.67008	0.0064725	99.5715	11.3344	0.0437914	0.043843
2459-26		sanidine	0.0109086	1.41e-05	0.0063979	1.31e-05	7.62e-05	2.33086e-07	0.0002034	2.21218e-06	3.97248e-07	7.48898e-08	0.0622973	1.68828	0.0053875	99.0575	11.4576	0.0364486	0.0365119
2459-27		sanidine	0.0254388	1.49e-05	0.0151379	1.33e-05	0.0001797	3.94972e-07	0.0005154	2.94226e-06	4.94605e-07	7.99078e-08	0.0667292	1.67267	0.0023749	99.5771	11.352	0.0160683	0.0162088
2459-28		sanidine	0.0167482	1.56e-05	0.0094901	1.29e-05	0.0001128	3.07534e-07	0.0005085	2.82576e-06	3.12671e-06	8.16361e-08	0.105022	1.66996	0.0037999	94.6615	11.3337	0.0257095	0.0257973
2459-29		sanidine	0.0055275	1.56e-05	0.0031352	1.3e-05	3.76e-05	1.49913e-07	0.0002061	1.97431e-06	8.66676e-07	7.93362e-08	0.128832	1.68499	0.0114321	95.6095	11.4353	0.077343	0.0773727
2459-30		sanidine	0.0455588	1.63e-05	0.0269363	1.39e-05	0.0003188	5.43436e-07	0.0009917	3.7315e-06	1.60615e-06	8.42256e-08	0.072159	1.67573	0.0014104	99.1166	11.3727	0.0095426	0.0097782
2459-31		sanidine	0.0093285	1.64e-05	0.0055111	1.36e-05	6.58e-05	2.29865e-07	0.000209	2.25829e-06	2.01517e-07	7.27237e-08	0.0743223	1.68403	0.0064565	99.5298	11.4288	0.0436812	0.0437338
2459-32		sanidine	0.0132417	1.53e-05	0.0066432	1.37e-05	8.01e-05	2.34537e-07	0.0002071	2.22264e-06	7.32487e-06	1.06016e-07	0.0611112	1.66581	0.006316	83.6003	11.3056	0.0427336	0.0427862
2459-33		sanidine	0.0207083	1.56e-05	0.0124148	1.32e-05	0.0001479	3.31944e-07	0.0003705	2.66251e-06	2.54815e-07	7.26878e-08	0.0584912	1.66353	0.0027866	99.7717	11.2901	0.0188543	0.0189729
2459-34		sanidine	0.0323199	1.56e-05	0.0193158	1.43e-05	0.0002293	4.66908e-07	0.0006159	3.22686e-06	3.55523e-07	6.85168e-08	0.0624915	1.66953	0.0018184	99.8198	11.3307	0.012303	0.0124853
2459-35		sanidine	0.0133833	1.63e-05	0.0080001	1.38e-05	9.57e-05	2.50647e-07	0.0003266	2.557e-06	3.43138e-08	7.98105e-08	0.0800147	1.67413	0.004624	100.114	11.3619	0.0312845	0.031357
2459-36		sanidine	0.0101042	1.56e-05	0.0060167	1.31e-05	7.16e-05	2.11231e-07	0.0002078	2.33473e-06	3.78162e-07	6.84078e-08	0.0677065	1.6626	0.0055913	99.0425	11.2839	0.0378307	0.0378899
2459-37		sanidine	0.0117534	1.49e-05	0.0068352	1.36e-05	8.14e-05	2.45624e-07	0.0002379	2.06377e-06	1.36808e-06	8.01094e-08	0.0682105	1.66179	0.005284	96.6811	11.2783	0.0357513	0.0358139
2459-38		sanidine	0.0168521	1.55e-05	0.0100687	1.36e-05	0.0001196	2.90352e-07	0.0003913	2.29775e-06	2.91159e-07	7.86793e-08	0.0761772	1.66742	0.0035908	99.6652	11.3164	0.0242951	0.0243877
2459-39		sanidine	0.0097466	1.49e-05	0.0057626	1.32e-05	6.84e-05	2.4141e-07	0.0001802	1.89596e-06	4.43744e-07	7.0803e-08	0.061285	1.6701	0.0058919	98.7839	11.3346	0.0398635	0.0399201
2459-40		sanidine	0.0126801	1.63e-05	0.0075609	1.27e-05	8.98e-05	2.79303e-07	0.0003002	2.29496e-06	3.27097e-07	8.0385e-08	0.0778125	1.66656	0.0047473	99.4143	11.3106	0.0321196	0.0321896
2459-41		sanidine	0.013171	1.42e-05	0.0070931	1.34e-05	8.49e-05	2.5671e-07	0.0002679	2.14473e-06	3.07859e-06	9.56117e-08	0.0740398	1.72957	0.0055588	93.1775	11.7369	0.0376016	0.037666
2459-42		sanidine	0.0024079	1.49e-05	0.001315	1.34e-05	1.56e-05	1.09629e-07	0.0019017	5.2969e-06	1.18342e-06	8.21823e-08	2.83444	1.67755	0.0277548	91.56	11.385	0.187778	0.18779
2459-43		sanidine	0.0169347	1.49e-05	0.0101241	1.34e-05	0.0001202	3.00539e-07	0.0003584	2.47716e-06	1.43143e-07	7.12623e-08	0.0693799	1.67057	0.0033879	99.9125	11.3377	0.0229216	0.0230201
2459-44		sanidine	0.0100993	1.49e-05	0.0059476	1.33e-05	7.1e-05	2.42284e-07	0.0002938	2.18963e-06	5.57548e-07	7.58395e-08	0.0968088	1.67325	0.005891	98.5789	11.3559	0.0398571	0.039914
2459-45		sanidine	0.0093889	1.42e-05	0.0054297	1.34e-05	6.46e-05	2.0912e-07	0.0002096	2.10777e-06	1.26027e-06	8.44367e-08	0.075661	1.66221	0.006725	96.1649	11.2812	0.0455017	0.0455509
2459-46		sanidine	0.0084488	1.63e-05	0.005058	1.32e-05	5.96e-05	2.07574e-07	0.0002013	2.10726e-06	4.5684e-08	7.58363e-08	0.0779906	1.67011	0.0070385	100.024	11.3347	0.0476211	0.0476685
2459-47		sanidine	0.0096002	1.49e-05	0.0057215	1.37e-05	6.81e-05	2.41206e-07	0.0004082	2.70738e-06	3.58163e-07	7.42103e-08	0.13985	1.66419	0.0061312	99.2196	11.2946	0.0414831	0.0415372
2459-48		sanidine	0.0098529	1.56e-05	0.0058745	1.42e-05	6.94e-05	2.21203e-07	0.0002756	2.15599e-06	1.42026e-07	6.84062e-08	0.0919695	1.67302	0.0059549	99.7881	11.3544	0.0402895	0.0403458
2459-49		sanidine	0.0246788	1.45e-05	0.0147502	1.34e-05	0.0001745	3.73311e-07	0.0004826	2.9212e-06	4.04354e-07	7.41216e-08	0.0641263	1.66679	0.0023493	99.6627	11.3122	0.015895	0.0160361
2459-51		sanidine	0.0047371	1.39e-05	0.0028178	1.37e-05	3.33e-05	1.58968e-07	0.0001235	2.11158e-06	1.90147e-07	7.2877e-08	0.0859097	1.66371	0.0122462	99.0046	11.2914	0.0828575	0.0828846
2459-52		sanidine	0.0094044	1.64e-05	0.005617	1.38e-05	6.68e-05	2.10057e-07	0.0011767	4.09477e-06	5.37142e-07	7.57241e-08	0.410584	1.66175	0.0064389	99.2806	11.2781	0.0435654	0.0436167
2459-53		sanidine	0.0019923	1.49e-05	0.0011563	1.44e-05	1.4e-05	1.06798e-07	0.0020536	5.67374e-06	8.89924e-07	8.36019e-08	3.48115	1.63482	0.0323527	94.8031	11.0959	0.218921	0.218931
2459-54		sanidine	0.0015739	1.4e-05	0.000893	1.36e-05	1.08e-05	8.74161e-08	0.0011854	4.45777e-06	5.09224e-07	7.41353e-08	2.60179	1.69792	0.0391433	96.2869	11.5228	0.264809	0.264817
2459-55		sanidine	0.0147651	1.7e-05	0.0087712	1.33e-05	0.0001044	2.84203e-07	0.0003627	2.72143e-06	4.68819e-07	8.07544e-08	0.0810515	1.66995	0.0042101	99.2436	11.3336	0.0284849	0.0285641
2459-56		sanidine	0.0081219	1.37e-05	0.0047	1.28e-05	5.64e-05	2.06634e-07	0.0002016	2.16254e-06	5.90745e-07	7.66179e-08	0.0840659	1.6932	0.0073125	98.0218	11.4909	0.0494706	0.0495176
2459-57		sanidine	0.0103215	1.49e-05	0.0061088	1.34e-05	7.2e-05	2.11597e-07	0.0002033	2.12923e-06	5.90034e-07	7.63439e-08	0.0652177	1.66266	0.0057598	98.4456	11.2843	0.0389705	0.0390279
2459-58		sanidine	0.0267163	1.56e-05	0.0159254	1.32e-05	0.0001892	4.08989e-07	0.0006684	3.25761e-06	3.88009e-07	7.66158e-08	0.082266	1.67292	0.0022304	99.7617	11.3537	0.0150901	0.0152397
2459-59		sanidine	0.0071629	1.52e-05	0.0042429	1.29e-05	5.06e-05	1.84366e-07	0.0002899	2.5848e-06	1.5096e-07	7.69961e-08	0.133927	1.68227	0.0082707	99.6883	11.4169	0.0559551	0.0559961
2459-60		sanidine	0.0111921	1.46e-05	0.0066659	1.27e-05	7.94e-05	2.44834e-07	0.0002179	2.15043e-06	2.00502e-07	7.85672e-08	0.0640802	1.6719	0.0052255	99.6167	11.3468	0.0353543	0.0354183
2459-61		sanidine	0.0130079	1.56e-05	0.0075543	1.27e-05	9e-05	2.79218e-07	0.0002468	2.84049e-06	1.21814e-06	8.12014e-08	0.0640267	1.67562	0.0047391	97.3507	11.372	0.0320628	0.0321337
2459-62		sanidine	0.0095762	1.49e-05	0.005684	1.34e-05	6.73e-05	2.41178e-07	0.000167	2.20813e-06	1.12687e-07	7.41038e-08	0.0575864	1.68042	0.00614	99.784	11.4044	0.0415406	0.0415956
2459-64		sanidine	0.0052559	1.41e-05	0.0031463	1.36e-05	3.69e-05	1.49554e-07	0.0001197	2.08833e-06	6.75108e-08	7.06137e-08	0.0745787	1.66638	0.0108072	99.7935	11.3094	0.0731205	0.0731513
2459-65		sanidine	0.0011118	1.49e-05	0.0006897	1.28e-05	7.68106e-06	7.82309e-08	0.0011475	4.03569e-06	4.64048e-07	7.41141e-08	3.26109	1.54361	0.0482072	95.6845	10.4786	0.326313	0.326319
2459-66		sanidine	0.0127578	1.56e-05	0.0075951	1.32e-05	9.03e-05	2.58792e-07	0.0002557	2.08271e-06	-3.0456e-10	7.58367e-08	0.065991	1.68169	0.0046552	100.157	11.413	0.0314949	0.0315676
2459-67		sanidine	0.0094643	1.56e-05	0.0056409	1.43e-05	6.69e-05	2.20249e-07	0.0001906	1.81907e-06	1.40098e-08	7.05417e-08	0.0662262	1.67898	0.0063035	100.113	11.3947	0.0426468	0.0427004
2459-68		sanidine	0.0047338	1.49e-05	0.0028356	1.24e-05	3.39e-05	1.4829e-07	0.0001547	2.14518e-06	8.77133e-08	7.33972e-08	0.106953	1.66379	0.011841	99.7029	11.2919	0.0801159	0.0801439
2459-69		sanidine	0.0041028	1.48e-05	0.00243	1.33e-05	2.9e-05	1.47908e-07	0.000101	1.74678e-06	-7.47187e-08	7.67669e-08	0.0814992	1.70015	0.0146023	100.737	11.5379	0.098785	0.0988087
2459-70		sanidine	0.0043811	1.44e-05	0.0026055	1.25e-05	3.12e-05	1.37735e-07	0.0001154	1.83267e-06	1.36443e-07	7.41117e-08	0.0868375	1.66862	0.0129294	99.2761	11.3246	0.0874781	0.0875039
2459-71		sanidine	0.0050471	1.63e-05	0.0030179	1.35e-05	3.58e-05	1.59371e-07	0.0001365	1.86274e-06	4.23237e-07	6.78489e-08	0.0886418	1.63339	0.0112836	97.7066	11.0862	0.0763529	0.0763812
2459-72		sanidine	0.0046092	1.45e-05	0.0027349	1.46e-05	3.22e-05	1.48241e-07	0.0001616	2.18721e-06	2.59993e-07	7.51955e-08	0.115798	1.66092	0.0132015	98.5895	11.2725	0.089322	0.0893471
2459-73		sanidine	0.0049955	1.37e-05	0.0028984	1.34e-05	3.49e-05	1.5935e-07	0.0002391	2.37048e-06	3.81715e-07	7.83874e-08	0.161689	1.6901	0.0122086	98.0942	11.4699	0.0825948	0.0826229
2459-74		sanidine	0.009174	1.56e-05	0.0054502	1.32e-05	6.53e-05	2.09456e-07	0.0003448	3.12978e-06	1.75223e-07	7.62624e-08	0.124	1.67796	0.0064913	99.7246	11.3878	0.0439176	0.0439695
2459-75		sanidine	0.0089881	1.49e-05	0.005398	1.32e-05	6.38e-05	2.19177e-07	0.0001941	2.12574e-06	2.39283e-07	6.68538e-08	0.0704615	1.65395	0.0061366	99.3728	11.2253	0.0415216	0.041575
2459-76		sanidine	0.0048941	1.49e-05	0.0028924	1.39e-05	3.43e-05	1.59038e-07	0.0001192	2.25088e-06	4.27399e-08	6.92683e-08	0.0807451	1.69019	0.0119669	99.9292	11.4705	0.0809595	0.080988
2459-77		sanidine	0.0010536	1.56e-05	0.0006185	1.35e-05	7.35294e-06	7.13384e-08	0.0009512	4.32032e-06	4.05471e-07	7.77541e-08	3.01433	1.63017	0.0575269	95.6381	11.0644	0.389273	0.389279
2459-78		sanidine	0.0055988	1.49e-05	0.00333	1.16e-05	3.91e-05	1.81464e-07	0.000135	2.58044e-06	2.74612e-07	7.1514e-08	0.0794775	1.65918	0.0097335	98.7226	11.2607	0.0658579	0.0658917
2459-79		sanidine	0.00494	1.63e-05	0.0029575	1.36e-05	3.47e-05	1.48651e-07	0.0001002	2.19995e-06	1.78777e-07	7.05491e-08	0.0664264	1.65423	0.0117903	99.0764	11.2272	0.0797755	0.0798033
2459-80		sanidine	0.0062898	1.41e-05	0.0037363	1.36e-05	4.44e-05	1.71991e-07	0.0001924	2.56537e-06	6.98458e-08	7.49273e-08	0.100948	1.68121	0.009355	99.9078	11.4098	0.0632916	0.0633277
2459-81		sanidine	0.0038962	1.49e-05	0.002353	1.3e-05	2.82e-05	1.36671e-07	0.0001458	2.42124e-06	2.6182e-07	6.93791e-08	0.12146	1.62684	0.0140779	98.2865	11.0419	0.0952633	0.0952858
2459-82		sanidine	0.0125152	1.63e-05	0.0074812	1.31e-05	8.91e-05	2.37913e-07	0.0002885	2.77403e-06	2.01619e-07	7.01542e-08	0.0755866	1.66717	0.0045901	99.6988	11.3148	0.0310563	0.0311287
2459-83		sanidine	0.007825	1.56e-05	0.0046306	1.35e-05	5.48e-05	2.0585e-07	0.0002056	2.64492e-06	2.48826e-07	7.84196e-08	0.0870142	1.67659	0.0077896	99.2553	11.3785	0.0527013	0.0527445

## Sheet: Table S4_U-Pb data
Table S4: Zircon U-Pb isotopic data for selected Cassia Formation members
Sample and spot		U (ppm)		Th (ppm)		Pb (ppm)		Th/U		204Pb (ppb)		207Pb/206Pb	±1s		207Pb/235U	±1s		206Pb/238U	±1s		Rho		206Pb/238U	±1s	206Pb/207Pb	±1s
number																							[Ma]	[Ma]	[Ma]	[Ma]
McMullen Creek Member: RC-10.1-006 (20 zircons)
McM2-RH1		91.2265		48.6363		0.546926		0.125657		0.276294		0.0617597	0.0105729		0.0121791	0.00210732		0.00143024	3.71797e-05		0.145183		9.21335	0.231276	-	-
McM2-1-2		144		96.8058		0.211419		0.689649		0.208533		0.0323228	0.00350836		0.00623022	0.000696241		0.00139795	3.71797e-05		0.237989		9.0055	0.239337	-	-
McM2-2-1		73.0068		34.4855		0.101091		0.484577		0.141615		0.0356724	0.00518089		0.007186	0.00108628		0.00146101	6.12586e-05		0.277369		9.41142	0.39431	-	-
McM2-3-1		70.5362		34.2511		0.095201		0.498139		0.0876487		0.0509124	0.00820273		0.00997551	0.00162763		0.00142105	3.66156e-05		0.15792		9.1542	0.2357	-	-
McM2-4-1		116.383		88.9451		0.160389		0.784013		0.0936633		0.0553321	0.00693888		0.00999829	0.00127422		0.00131053	2.9764e-05		0.178207		8.4427	0.191617	-	-
McM2-5-1		137.099		101.672		0.200407		0.760771		0.20968		0.0353879	0.00382179		0.00663071	0.000752345		0.00135895	4.72844e-05		0.30666		8.7544	0.304394	-	-
McM2-6-1		133.539		74.377		0.196441		0.571373		0.0555387		0.0467749	0.00655267		0.00926534	0.00133737		0.00143664	4.99581e-05		0.240918		9.25452	0.32158	-	-
McM2-6-2		110.504		63.8542		0.147207		0.592792		0.115559		0.0392613	0.00643965		0.0073844	0.00123143		0.00136411	4.10721e-05		0.180552		8.78762	0.264402	-	-
McM2-6-3		66.2876		32.0407		0.0822578		0.495859		0.119882		0.0373256	0.00817555		0.00684847	0.00151693		0.00133072	4.38523e-05		0.148777		8.57265	0.282308	-	-
McM2-7-1		50.9585		26.9637		0.0633628		0.542814		0.115491		0.0311287	0.00791276		0.00570853	0.00147234		0.00133003	5.80864e-05		0.169328		8.56825	0.373941	-	-
McM2-8-1		2392.26		2947.54		4.95295		1.26398		1.65368		0.0430856	0.00169815		0.00982951	0.00045076		0.00165462	3.87878e-05		0.511191		10.6575	0.249624	-	-
McM2-9-1		118.988		63.9917		0.159617		0.551707		0.140025		0.0406553	0.00564093		0.00738364	0.00104727		0.0013172	3.87663e-05		0.207498		8.48562	0.24957	-	-
McM2-10-1		139.477		98.1063		0.216181		0.721578		0.0839865		0.0496576	0.00345211		0.00979574	0.000732984		0.00143071	3.96044e-05		0.369943		9.21633	0.254936	-	-
McM2-13-1		144.669		68.2875		0.230721		0.484233		0.359846		0.0370691	0.00313198		0.00797961	0.000724242		0.00156123	5.17585e-05		0.365268		10.0565	0.333128	-	-
McM2-14-1		97.4684		60.9477		0.142469		0.641479		0.186408		0.0330785	0.0075294		0.00628361	0.00144227		0.00137772	4.06791e-05		0.128639		8.87526	0.261869	-	-
McM2-15-1		279.28		183.273		0.42257		0.673207		0.438171		0.0502209	0.00442613		0.0101101	0.000926079		0.00146006	3.64422e-05		0.272485		9.40527	0.234575	-	-
McM2-16-1		265.56		138.274		0.402251		0.534153		0.248916		0.0396303	0.00305087		0.00787795	0.000625737		0.00144173	2.81985e-05		0.246243		9.2873	0.181515	-	-
McM2-17-1		610.296		258.069		0.869661		0.433794		0.352768		0.043803	0.00164545		0.00853332	0.000352873		0.0014129	2.44275e-05		0.418087		9.10174	0.157246	-	-
McM2-18-1		343.449		305.946		0.520806		0.913844		2.18533		0.0381351	0.00542346		0.0074761	0.00107303		0.00142183	2.75251e-05		0.134878		9.15922	0.177184	-	-
McM2-19-1		94.3258		131.875		26.5886		1.43424		0.523152		0.0917483	0.000573461		2.71158	0.0463068		0.21435	0.00340655		0.930614		1251.95	18.0585	1462	12
McM2-19-2		72.5062		42.1113		0.09367		0.595816		0.229576		0.0413795	0.00636364		0.0073371	0.00115263		0.00128599	4.12448e-05		0.204158		8.2847	0.265534	-	-
McM2-19-3		334.872		800.189		129.094		2.45133		0.730478		0.0915989	0.000230566		3.09778	0.0414816		0.245278	0.00322591		0.982174		1414.08	16.6779	1459	4
McM2-20-1		136.771		111.789		0.193193		0.838487		0.165742		0.0334291	0.00373172		0.00630823	0.000731026		0.00136862	4.25762e-05		0.268448		8.81664	0.274083	-	-
McM2-21-1		93.0442		52.4523		0.129948		0.578315		0.0592549		0.0409803	0.00422361		0.00779484	0.000826156		0.00137953	3.41016e-05		0.233232		8.8869	0.219526	-	-
Indian Springs Member: RC-10.1-010 (12 zircons)
McM1-RH1		228.154		153.888		0.35121		0.691936		0.453838		0.0515184	0.00374066		0.00995761	0.000775771		0.00140182	3.95897e-05		0.362503		9.03037	0.254849	-	-
McM1-RH2		112.177		83.1493		0.158507		0.760401		0.32958		0.0435718	0.00599799		0.00797542	0.00112013		0.00132754	3.69776e-05		0.198326		8.55218	0.238053	-	-
McM1-RH3		969.434		896.351		1.59596		0.948525		0.885664		0.0406686	0.00173322		0.00792246	0.00035974		0.00141286	2.21395e-05		0.345096		9.10147	0.142518	-	-
McM1-RH4		158.441		125.994		0.229767		0.815778		0.27048		0.0327751	0.00484582		0.00603116	0.000903043		0.00133462	3.15568e-05		0.157917		8.59775	0.203154	-	-
McM1-RH6		104.963		59.6261		0.143581		0.582758		0.468522		0.0398986	0.0130357		0.0076896	0.0025225		0.0013978	4.10819e-05		0.089594		9.0045	0.264456	-	-
McM1-6-1		149.733		119.119		0.139965		0.816114		0.881073		0.0296294	0.0189815		0.00574099	0.00368002		0.00140528	3.09772e-05		0.0343887		9.05265	0.199408	-	-
McM1-RH7		109.512		62.4859		0.171333		0.58534		0.155049		0.0449378	0.00499565		0.00960031	0.00110796		0.00154943	4.80253e-05		0.268572		9.98054	0.309105	-	-
McM1-RH9		87.1349		44.8252		0.117417		0.527739		0.224656		0.0511167	0.00853995		0.00948114	0.00162077		0.00134523	4.87127e-05		0.211828		8.66608	0.313593	-	-
McM1-RH10		440.266		165.395		0.626548		0.385386		0.666363		0.0444294	0.00427708		0.00867033	0.000850485		0.00141535	2.6652e-05		0.19197		9.11749	0.171564	-	-
Little Creek Member: RC-11.1-004 (19 zircons)
UWS-2-1		82.1483		43.6265		0.122159		0.544805		0.226069		0.0342685	0.00884344		0.00687405	0.00178948		0.00145484	4.97971e-05		0.131485		9.3717	0.320539	-	-
UWS-3-1		87.5092		37.2038		0.146393		0.436137		0.0817648		0.0382925	0.00488191		0.00883036	0.00114243		0.00167249	3.68081e-05		0.170109		10.7726	0.23688	-	-
UWS-4-1		141.105		65.3337		0.2257		0.474991		0.122355		0.0462334	0.00317197		0.0101079	0.00075022		0.00158563	4.48989e-05		0.381508		10.2135	0.288972	-	-
UWS-6-1		97.8041		71.2387		0.171939		0.747219		0.0600474		0.0440958	0.00397884		0.00987488	0.000915901		0.00162418	3.48688e-05		0.231466		10.4616	0.22441	-	-
UWS-7-1		76.0135		36.5047		0.122194		0.492659		0.0865369		0.0501421	0.00946694		0.0106546	0.00205592		0.00154111	6.1399e-05		0.206471		9.927	0.395182	-	-
UWS-8-1		198.574		90.8198		0.328012		0.469187		0.238243		0.0430083	0.00533142		0.00941678	0.00119885		0.00158799	4.60547e-05		0.227804		10.2287	0.29641	-	-
UWS-9-1		93.0573		65.0088		0.16138		0.716656		0.122384		0.0366243	0.00472233		0.00808789	0.00107794		0.00160164	5.40218e-05		0.253072		10.3166	0.34768	-	-
UWS-10-1		176.293		171.985		0.291849		1.00079		0.249688		0.0344563	0.00248822		0.00683528	0.000503049		0.00143875	2.04253e-05		0.192898		9.26814	0.131479	-	-
UWS-11-1		96.318		59.9102		0.146291		0.638091		0.141831		0.0532215	0.00773683		0.0113761	0.00171693		0.00155025	6.28935e-05		0.268807		9.98584	0.404797	-	-
UWS-12-1		168.895		97.4103		0.295828		0.591667		0.191204		0.0358021	0.00368245		0.00826569	0.000870295		0.00167444	3.7691e-05		0.213787		10.7851	0.242561	-	-
UWS-13-1		108.497		53.3678		0.184631		0.504601		0.127665		0.0403179	0.0036788		0.00931996	0.000892241		0.00167654	4.85746e-05		0.30264		10.7986	0.3126	-	-
UWS-15-1		642.985		678.331		1.1896		1.08225		0.153631		0.0431778	0.0015132		0.00926219	0.000349622		0.00155579	2.18172e-05		0.371503		10.0215	0.140423	-	-
UWS-16-1		1313.66		1067.22		2.47268		0.833409		2.23338		0.0410264	0.00296853		0.00941105	0.000689749		0.00166369	1.94132e-05		0.15921		10.716	0.124937	-	-
UWS-16-2		113.801		62.4185		0.181688		0.562673		0.0883933		0.0376369	0.00257469		0.00815514	0.00059957		0.00157151	4.233e-05		0.366373		10.1226	0.272443	-	-
UWS-17-1		94.9688		44.406		0.148186		0.479678		0.152448		0.0369373	0.00489065		0.00784615	0.00106161		0.0015406	4.29178e-05		0.205892		9.92371	0.276234	-	-
UWS-18-1		90.2875		50.6009		0.135076		0.574936		0.000701348		0.0461924	0.00384753		0.0102042	0.000893758		0.00160216	4.33985e-05		0.309262		10.3199	0.279311	-	-
UWS-19-1		722.898		534.62		1.32054		0.758677		0.982249		0.0456407	0.00463505		0.0103515	0.00106491		0.00164494	2.70144e-05		0.159639		10.5952	0.173858	-	-
UWS-20-1		192.287		104.025		0.333737		0.554978		0.0799941		0.0462108	0.00325594		0.0109019	0.000808168		0.00171102	3.94301e-05		0.310864		11.0205	0.253743	-	-
UWS-14-1		347.155		27.7577		21.2532		0.0820253		1.00607		0.0903212	0.000802305		0.789334	0.0392596		0.0633826	0.00310181		0.983923		396.164	18.7764	1432	17
UWS-14-2		458.133		62.8022		25.8958		0.140628		1.16951		0.0925274	0.000651886		0.733059	0.0505558		0.0574602	0.00394204		0.994768		360.161	23.9865	1478	13
UWS-21-1		188.67		66.2738		44.3071		0.360354		0.0408423		0.0899703	0.000767278		2.87154	0.0464399		0.23148	0.00318082		0.849665		1342.25	16.6291	1424	17
UWS-21-2		592.519		690.253		194.766		1.19507		0.80107		0.0930756	0.000175094		3.40965	0.0375455		0.265689	0.00288263		0.985299		1518.88	14.6651	1489	3

## Sheet: Table S5a_Major Elements Refs
Table S5a: XRF major element data and recommended values for international reference material. Batch IDs indicate individual runs.
Batch ID	Reference	SiO2	TiO2	Al2O3	Fe2O3	MnO	MgO	CaO	Na2O	K2O	P2O5
	Material	(wt%)	(wt%)	(wt%)	(wt%)	(wt%)	(wt%)	(wt%)	(wt%)	(wt%)	(wt%)
AFUS401	BH-1	68.8368	0.406377	14.3766	5.7216	0.129063	2.64631	3.42984	3.6859	0.902195	0.0649679
AFUS406	BH-1	68.738	0.40619	14.4279	5.71557	0.128024	2.66719	3.47474	3.72319	0.912015	0.0698161
AFUS407	BH-1	68.6186	0.413211	14.4795	5.72356	0.130024	2.69962	3.51071	3.75579	0.911008	0.075887
AFUS410	BH-1	68.6998	0.418712	14.2884	5.84188	0.131248	2.72483	3.5722	3.81695	0.928968	0.073501
AFUS414	BH-1	68.44	0.40535	14.4312	5.72998	0.128336	2.65285	3.50589	3.73099	0.929329	0.0661889
AFUS416	BH-1	69.4555	0.410597	14.5721	5.75896	0.130157	2.70292	3.52032	3.81148	0.920519	0.0739947
AFUS418	BH-1	69.4322	0.411825	14.5984	5.75501	0.129967	2.71249	3.51664	3.81676	0.912432	0.0729919
AFUS421	BH-1	69.4295	0.41096	14.6081	5.76373	0.129322	2.69506	3.50414	3.80734	0.920294	0.0723717
AFUS428	BH-1	68.7231	0.402848	14.4103	5.70084	0.127832	2.6596	3.44978	3.76803	0.906208	0.0746043
agreed reference value:		66.35	0.423	13.99	5.66	0.13	2.44	3.44	3.84	0.85	0.07
	Average	68.9304	0.409563	14.4658	5.74568	0.12933	2.68454	3.49825	3.76849	0.915885	0.0715915
	StDv	0.396268	0.00486713	0.108645	0.0419467	0.00113242	0.0284379	0.0420179	0.04806	0.00951685	0.00380348
	% StDv	0.574881	1.18837	0.751047	0.730056	0.875602	1.05932	1.20111	1.27531	1.03909	5.31275
AFUS401	WS-1	51.5554	2.5085	13.8784	13.4479	0.177087	5.32101	8.63797	2.82018	1.3206	0.295401
AFUS406	WS-1	51.4528	2.50434	13.8589	13.4335	0.178033	5.2908	8.67735	2.83085	1.30964	0.297477
AFUS407	WS-1	51.5166	2.50735	13.8974	13.4425	0.178033	5.31614	8.68734	2.85733	1.32373	0.299501
AFUS410	WS-1	51.4875	2.56549	13.7325	13.7619	0.182344	5.39372	8.89183	2.89033	1.35113	0.302171
AFUS414	WS-1	51.1488	2.50243	13.8581	13.5131	0.17732	5.23331	8.74277	2.78422	1.34258	0.296877
AFUS416	WS-1	51.9564	2.534	14.0607	13.5564	0.180829	5.35835	8.78249	2.86459	1.32503	0.303978
AFUS418	WS-1	51.8747	2.52454	14.0182	13.5597	0.179572	5.35771	8.77381	2.85485	1.33462	0.304966
AFUS421	WS-1	51.9883	2.52432	14.0434	13.5599	0.179061	5.32856	8.79699	2.86225	1.3369	0.308585
AFUS428	WS-1	51.3121	2.4955	13.8552	13.4213	0.177981	5.29067	8.68028	2.82354	1.31919	0.306375
agreed reference value:		50.99	2.52	13.95	13.43	0.18	5.28	8.81	3.08	1.36	0.3
	Average	51.5881	2.5185	13.9114	13.5218	0.178918	5.32114	8.7412	2.84313	1.32927	0.301703
	StDv	0.291904	0.0215952	0.107925	0.106912	0.00173889	0.0469473	0.0789919	0.0314739	0.0130039	0.00462255
	% StDv	0.565837	0.857465	0.775799	0.790661	0.971891	0.882278	0.903673	1.10702	0.978274	1.53215
AFUS401	BCS375	67.4698	0.378281	20.1189	0.119866	0.00500246	0.011153	0.804321	10.5271	0.752332	0.0192874
AFUS406	BCS375	67.4728	0.378108	20.1359	0.108859	0.00600113	0.0314145	0.81347	10.5299	0.753973	0.0202365
AFUS407	BCS375	67.3555	0.38212	20.0944	0.117847	0.00600113	0.0689091	0.857442	10.4504	0.766052	0.0242838
AFUS410	BCS375	67.4112	0.390597	19.9207	0.114899	0.00601135	0.0650949	0.861666	10.6562	0.776827	0.0255212
AFUS414	BCS375	67.0702	0.374094	20.0928	0.103932	0.00391867	0.0221955	0.85281	10.4222	0.769267	0.0175206
AFUS416	BCS375	68.1434	0.384811	20.4061	0.111547	0.0059614	0.0514465	0.841235	10.6201	0.761673	0.0269981
AFUS418	BCS375	68.0781	0.383047	20.3764	0.111566	0.00595268	0.0514404	0.845537	10.5989	0.759538	0.0259971
AFUS421	BCS375	68.1519	0.38118	20.3913	0.111869	0.00596871	0.0476651	0.841865	10.6238	0.760974	0.0271394
AFUS428	BCS375	67.43	0.377364	20.2218	0.109594	0.0049166	0.0452447	0.822775	10.5289	0.7555	0.0278523
agreed reference value:		67.1	0.38	19.8	0.12	0.003	0.5	0.89	10.4	0.79	0
	Average	67.6203	0.381067	20.1954	0.11222	0.00552601	0.0438404	0.837902	10.5508	0.761793	0.0238707
	StDv	0.397331	0.00485703	0.166513	0.00481134	0.000748636	0.0190518	0.0200228	0.0803523	0.00787452	0.003845
	% StDv	0.587591	1.27459	0.824511	4.28742	13.5475	43.4572	2.38963	0.761574	1.03368	16.1076
AFUS401	MRG-1	39.5738	3.87111	8.50744	18.0608	0.173085	13.6888	14.873	0.722106	0.197135	0.0588772
AFUS406	MRG-1	39.6955	3.84928	8.55996	17.9866	0.171032	13.5771	14.8413	0.769086	0.218441	0.0607096
AFUS407	MRG-1	39.7086	3.86532	8.54477	18.0426	0.171032	13.5822	14.8823	0.786403	0.212401	0.0596978
AFUS410	MRG-1	39.639	3.95216	8.4352	18.4978	0.176333	13.8469	15.2378	0.784459	0.21058	0.0622717
AFUS414	MRG-1	39.3066	3.84545	8.4733	18.1606	0.173401	13.518	15.0393	0.720473	0.205655	0.0545085
AFUS416	MRG-1	39.9755	3.90662	8.63735	18.2305	0.173874	13.7728	15.1096	0.777447	0.203244	0.0629955
AFUS418	MRG-1	39.9056	3.90192	8.60418	18.2227	0.17362	13.7524	15.1089	0.779682	0.204188	0.0639929
AFUS421	MRG-1	39.9885	3.89419	8.60039	18.2238	0.173093	13.7802	15.1011	0.777254	0.202861	0.0643304
AFUS428	MRG-1	39.4734	3.84911	8.50605	18.0223	0.174048	13.5901	14.9402	0.749447	0.200618	0.064657
agreed reference value:		39.5931	3.81852	8.56888	18.1608	0.172188	13.7244	14.8993	0.749524	0.182317	0.0810296
	Average	39.6963	3.88169	8.54096	18.1609	0.17328	13.6787	15.0148	0.762928	0.206125	0.0613379
	StDv	0.231066	0.0352803	0.0664264	0.157997	0.00160355	0.115258	0.136449	0.0259806	0.00656673	0.00328672
	% StDv	0.582084	0.908891	0.77774	0.869988	0.925409	0.842606	0.908761	3.40538	3.1858	5.35839
AFUS410	BCS372/1	20.1168	0.272112	5.22096	3.48095	0.073138	1.39446	66.292	0.110458	0.758691	0.0775844
AFUS416	BCS372/1	20.3155	0.274723	5.36198	3.43129	0.0705432	1.37916	65.6143	0.110637	0.75082	0.0779944
AFUS418	BCS372/1	20.3006	0.273889	5.36077	3.4299	0.0714321	1.37504	65.586	0.106547	0.749674	0.0769915
AFUS421	BCS372/1	20.3675	0.26901	5.34543	3.43428	0.0716245	1.37832	65.5813	0.105898	0.747121	0.0784026
AFUS428	BCS372/1	20.176	0.264645	5.28838	3.39937	0.0698157	1.35537	64.7426	0.106922	0.741799	0.0775884
agreed reference value:		20.5	0.16	3.77	4.82	0.07	2.42	64.8	0.1	0.49	0.08
	Average	20.2553	0.270876	5.3155	3.43516	0.0713107	1.37647	65.5632	0.108092	0.749621	0.0777123
	StDv	0.104589	0.00411457	0.0607822	0.0292452	0.00125265	0.0139754	0.549544	0.00227176	0.00614694	0.000526175
	% StDv	0.516356	1.51899	1.14349	0.851351	1.75661	1.01531	0.83819	2.10168	0.820006	0.677081

## Sheet: Table S5b_Trace Elements Refs
Table S5b: XRF trace element data and recommended values for international reference material. Batch IDs indicate individual runs.
Batch ID	Reference	Zn	V	Ba	La	Ce	Nd	Rb	Sr	Y	Zr	Nb	Th
	Material	(ppm)	(ppm)	(ppm)	(ppm)	(ppm)	(ppm)	(ppm)	(ppm)	(ppm)	(ppm)	(ppm)	(ppm)
AXRHT495	NIM-G	53.9108	0.297773	110.944	111.053	204.901	79.0113	318.439	12.5818	144.117	285.428	55.7036	51.6518
AXRHT504	NIM-G	53.0224	1.66676	99.8927	110.126	205.143	77.1552	318.802	13.0935	144.636	285.429	55.7503	51.4077
AXRHT514	NIM-G	51.6045	2.79905	103.139	110.548	207.104	77.3271	319.057	13.2771	144.196	284.149	55.6305	51.0257
AXRHT517	NIM-G	52.3143	0.0763159	107.045	111.586	204.684	77.0162	319.291	13.0059	143.819	284.283	55.7503	51.178
AXRHT523	NIM-G	54.0952	0.410407	105.099	109.23	203.95	78.185	318.41	13.0561	143.959	283.71	55.4557	51.3192
AXRHT526	NIM-G	53.2904	-0.379128	103.197	110.12	201.402	75.8866	319.005	13.3341	144.139	283.994	55.5812	50.5603
AXRHT529	NIM-G	54.3673	1.49826	109.257	111.681	203.854	77.3857	318.42	13.5941	143.966	284.798	55.5015	51.8749
AXRHT549	NIM-G	54.3458	0.724587	105.331	108.638	204.956	77.2157	319.052	13.4054	144.065	283.677	55.4314	51.9702
AXRHT552	NIM-G	53.3515	1.00068	107.278	109.66	202.868	78.8262	318.282	13.8496	143.988	283.8	55.3301	51.8686
agreed reference value:		50	2	120	109	195	72	320	10	143	300	53	51
	Average	53.3669	0.899411	105.687	110.293	204.318	77.5565	318.751	13.2442	144.098	284.363	55.5705	51.4285
	StDv	0.943657	0.968899	3.38203	1.03489	1.59201	0.972297	0.368289	0.367035	0.231467	0.694725	0.150507	0.464677
	% StDv	1.76824	107.726	3.20004	0.938308	0.779185	1.25366	0.115541	2.7713	0.160631	0.244309	0.27084	0.903541
Devi. from rec. value [%]		-6.73383	55.0294	11.9274	-1.18667	-4.7784	-7.71741	0.390326	-32.4417	-0.767973	5.2123	-4.85003	-0.840201
AXRHT495	MRG-1	215.924	550.148	51.6731	7.64353	31.2648	19.8255	8.42032	273.997	14.7144	111.641	21.2216	0.861339
AXRHT504	MRG-1	213.91	547.75	50.5477	8.61853	34.2986	18.469	8.54074	273.175	14.6751	112.12	21.5171	0.261547
AXRHT514	MRG-1	209.433	550.006	51.944	9.28502	30.5958	19.0414	9.05757	273.957	14.3455	111.738	21.5962	0.57489
AXRHT517	MRG-1	214.896	549.47	51.5348	6.73609	33.2093	20.4991	8.94937	274.883	14.2963	112.307	21.5022	-0.117549
AXRHT523	MRG-1	216.394	549.533	51.8648	8.567	34.6195	18.1838	8.73434	274.125	14.3333	111.7	21.5067	0.550093
AXRHT526	MRG-1	216.341	548.376	54.6821	9.08594	32.7553	18.7357	8.87696	273.112	14.2604	111.827	21.3847	1.16738
AXRHT529	MRG-1	215.241	548.938	51.5086	9.77596	32.7252	15.0506	8.75352	274.395	14.3173	112.222	21.2191	0.533736
AXRHT549	MRG-1	219.638	550.178	54.1203	7.03954	27.199	15.9017	8.79817	273.992	14.2284	111.705	21.2759	0.668189
AXRHT552	MRG-1	218.608	534.896	49.5842	6.8209	28.9453	16.206	8.46328	273.724	14.0716	112.187	21.8029	0.327455
agreed reference value:		191	526	61	9.8	28	19.2	8.5	266	14	108	20	0.93
	Average	215.598	547.699	51.94	8.17472	31.7348	17.9903	8.7327	273.929	14.3603	111.939	21.4474	0.536342
	StDv	2.91867	4.87199	1.58857	1.14298	2.47396	1.86336	0.219384	0.553916	0.206806	0.265273	0.192452	0.365652
	% StDv	1.35375	0.889537	3.05847	13.9819	7.79575	10.3576	2.51221	0.202212	1.44013	0.236981	0.897322	68.1752
Devi. from rec. value [%]		-12.8787	-4.12535	14.8525	16.5845	-13.3384	6.30042	-2.7376	-2.98082	-2.57326	-3.64683	-7.23683	42.3288
AXRHT495	BE-N	116.091	233.453	1109.9	82.0502	154.944	67.7008	44.8117	1373.75	29.6604	267.449	112.71	10.415
AXRHT504	BE-N	117.91	233.564	1120.94	83.4215	149.588	64.3283	44.491	1374.94	29.9261	268.669	112.931	10.4296
AXRHT514	BE-N	115.517	231.437	1102.09	81.7716	152.389	66.7647	44.6327	1376.34	29.789	269.827	112.903	10.3822
AXRHT517	BE-N	115.932	234.491	1121.87	79.7182	152.78	68.5328	44.6192	1375.68	29.882	268.738	112.555	10.4146
AXRHT523	BE-N	118.291	233.255	1112.89	79.279	152.299	65.3758	44.0809	1375	30.0797	268.136	112.8	10.4415
AXRHT526	BE-N	119.167	231.892	1110.84	83.7355	158.208	70.1439	44.4863	1375.71	29.9258	268.117	113.282	10.3752
AXRHT529	BE-N	117.625	233.317	1118.59	80.5583	152.58	66.489	44.362	1376.01	29.8134	268.844	112.613	10.4042
AXRHT549	BE-N	119.766	232.837	1122.51	81.3194	149.894	65.3064	44.2435	1375.71	29.7866	267.68	113.136	10.3854
AXRHT552	BE-N	117.745	244.892	1161.76	85.3032	159.269	68.0459	44.5413	1376.71	29.5799	268.357	112.882	10.4
agreed reference value:		120	235	1025	82	152	70	47	1370	30	265	100	10.4
	Average	117.56	234.349	1120.15	81.9063	153.55	66.9653	44.4743	1375.54	29.827	268.424	112.868	10.4053
	StDv	1.46327	4.0568	17.0076	1.97079	3.35152	1.82922	0.21951	0.876539	0.149396	0.706302	0.235039	0.0222017
	% StDv	1.2447	1.73109	1.51832	2.40615	2.18269	2.7316	0.493567	0.0637233	0.500876	0.263129	0.208243	0.213369
Devi. from rec. value [%]		2.03298	0.277158	-9.28334	0.114256	-1.0198	4.3353	5.37385	-0.404359	0.576694	-1.29213	-12.868	-0.0509748
AXRHT495	JR-3	193.916	0.549666	52.4632	156.651	309.061	103.894	472.472	9.68756	174.289	1670.92	572.159	113.627
AXRHT504	JR-3	192.917	0.694461	54.8426	157.776	308.497	106.049	471.406	10.3389	173.912	1673	572.801	113.633
AXRHT514	JR-3	189.936	1.60623	58.2052	157.52	309.381	104.087	471.562	10.9715	174.1	1673.3	573.081	113.582
AXRHT517	JR-3	190.708	0.792617	53.1903	158.221	310.581	105.15	471.367	10.8081	174.305	1672.55	573.11	113.681
AXRHT523	JR-3	194.275	1.97801	52.987	157.563	309.123	104.902	471.485	10.4691	174.478	1671.91	572.984	113.661
AXRHT526	JR-3	194.309	1.95694	49.4652	155.52	310.451	104.06	471.758	10.5951	174.165	1671.97	572.822	113.941
AXRHT529	JR-3	194.109	0.525707	51.7846	157.767	309.242	103.189	472.009	10.959	174.535	1672.62	572.946	113.619
AXRHT549	JR-3	191.103	0.434693	53.7027	157.636	309.715	103.87	471.194	10.8374	174.366	1671.71	572.912	113.426
AXRHT552	JR-3	193.453	1.76209	49.7736	157.983	316.363	106.081	471.813	11.0239	174.43	1671.88	572.917	113.387
agreed reference value:		209	4.2	65.8	179	327	107	453	10.4	166	1675	564	112
	Average	192.747	1.14449	52.9349	157.404	310.268	104.587	471.674	10.6323	174.287	1672.21	572.859	113.617
	StDv	1.70606	0.662977	2.63748	0.827815	2.38046	1.01624	0.390628	0.426434	0.198584	0.731868	0.282156	0.158919
	% StDv	0.885127	57.9278	4.9825	0.525917	0.767225	0.97167	0.0828174	4.01075	0.113941	0.0437666	0.049254	0.139872
Devi. from rec. value [%]		7.77641	72.7503	19.5518	12.0648	5.11674	2.25532	-4.12231	-2.23354	-4.9919	0.166754	-1.57075	-1.44417

## Sheet: Table S6_Member summary
Table S6: Summary of all members of the Cassia Formation including type localities, mineral phases, distinguishing characteristics, and previous terminology
Member	Type locality	Grid Ref.	Mineral phases*	Distinguishing characteristics	Previous local terminology#
Shoshone Rhyolite	Snake River canyon	N42°32'55.3" W114°22'15.8"	plag, pig, aug, mt, qtz	rhyolite lava exposed in the Snake River canyon at Twin Falls, ID	-
Kimberly	Kimberly borehole	N42°32'55.3" W114°22'15.8"	plag, anorth, san, pig, aug, mt, qtz	rhyolite of equivocal origin only exposed in Kimberly borehole; only member containing anorthoclase crystals	-
Castleford Crossing	Castleford Crossing	N42°32'41.9" W114°57'13.7"	plag, pig, aug, mt, qtz	hydrothermally altered basal ashfall at Castleford Crossing; >1.3 km thick in Kimberly borehole; highest-MgO pyroxenes of all members; distinct paleomagnetic TRM direction and normal polarity	Castleford Crossing ignimbrite (Bonnichsen et al., 1989)
Lincoln Reservoir	Rock Creek canyon, Little Creek section	N42°20'31.0" W114°16'54.8"	plag, pig, aug, mt, ap, zr	four compositonal modes of pyroxene; red axiolites in the basal vitrophyre; highly rheomorphic; well fused parallel-bedded basal ashfall; overlies a baked orange paleosol; distinct paleomagnetic TRM direction and normal polarity; lower Th/Nb whole rock ratios than older members	Goose Creek member B (Hackett et al., 1989) McMullen Creek member 5 (Wright et al., 2002)
McMullen Creek	Rock Creek canyon, Little Creek section	N42°20'30.3'' W114°16'59.3''	plag, pig, aug, mt, ap, zr	compound welding profile, with two intensely welded zones enclosing a central lapilli-tuff; capped by an orange ash and baked paleosol; distinct paleomagnetic TRM direction and normal polarity	Goose Creek member A (Hackett et al., 1989) McMullen Creek member 4 (Wright et al., 2002)
Indian Springs	Dry Gulch quarry	N42°24'55.1'' W114°19'35.6''	plag, pig, aug, mt, ilm, ap, zr	thinnest member (≤8 m); distinct paleomagnetic TRM direction and normal polarity	McMullen Creek member 3 (Wright et al., 2002)
Dry Gulch	Dry Gulch quarry	N42°24'53.0'' W114°19'36.4''	plag, pig, aug, mt, ap, zr	unique Rb/Sr and Th/Nb whole rock ratios; reverse magnetic polarity and distinct paleomagnetic TRM direction	McMullen Creek member 1 (Wright et al., 2002)
Little Creek	Rock Creek canyon, Little Creek section	N42°20'.24.2'' W114°16'55.8''	plag, pig, aug, mt, ap, zr	compound welding profile, with two intensely welded zones enclosing a central lapilli-tuff; high-MgO pyroxenes; distinct paleomagnetic TRM direction and normal polarity	Tuff of Wooden Shoe Butte upper (Williams et al., 1990) McMullen Creek member 2 (Wright et al., 2002)
Wooden Shoe	Rock Creek canyon, Little Creek section	N42°20'20.6'' W114°17'00.0''	plag, san, pig, aug, mt, ap, zr	basal ashfall with two distinct layers of ash-coated pellets; youngest member to contain sanidine crystals, which are absent from all but one of the above units; three composional modes of pyroxene; distinct paleomagnetic TRM direction and normal polarity	Tuff of Day Canyon (Hackett et al., 1989) Tuff of Wooden Shoe Butte lower (Williams et al., 1990)
Deadeye	Rock Creek canyon, Steer Basin	N42°16'44.6" W114°15'42.6"	unknown	non-welded eruption unit from a phreatomagmatic explosive eruption (Ellis and Branney, 2010)	-
Steer Basin	Rock Creek canyon, Shipper section	N42°19'45.9" W114°16'33.1"	plag, san, pig, aug, mt, ilm, ap, zr	distinct basal obsidian layer; low angle cross-bedding in the lower vitrophyre highlighted by crystal concentrations; prominent columnar cooling joints; unique Rb/Sr and Th/Nb whole rock ratios; distinct paleomagnetic TRM direction and normal polarity	-
Big Bluff	Rock Creek canyon, Magpie Basin	N42°15'06.5'' W114°15'55.0''	plag, san, aug, fay, qtz, mt, ilm, ap, zr	thickest member (95 m) with a compound welding profile and multiple erosional benches; uniquely contains fayalitic olivine crystals and lacks pigeonite	-
Magpie Basin	Rock Creek canyon, Magpie Basin	N42°15'01.3'' W114°15'51.2''	plag, san, pig, aug, mt, ilm, ap, zr	reverse magnetic polarity and distinct paleomagnetic TRM direction	-
*Mineral abbreviations: plag - plagioclase; san - sanidine; anorth - anorthoclase; pig - pigeonite; aug - augite; mt - magnetite; ilm - ilmenite; fay - fayalite; ap - apatite; zr - zircon; qtz - quartz.
#Previous terminology provided where different from this study, and where units of the present study could be confidently traced to previous literature.
